# Supplementary material
Source: publisher figshare collection journal article supplement (https://frontiersin.figshare.com/ndownloader/files/24679025)
Supplement: Supplementary file 1 [file 24679025]

## Sheet: Table S2
In situ major elements concentrations in wt% analyzed by EPMA on a Cameca SX100 at LMV (Clermont-Ferrand, France)
Mineral	Sample	Point	Depth (mbsf)	Grain area	Lithology	SiO2	Al2O3	TiO2	CaO	Na2O	K2O	MnO	MgO	FeO	Cr2O3	NiO	Total
					2 sigma	0.424667	0.0653333	0.0546667	0.0286667			0.0613333	0.445333	0.355333	0.0873333	0.054
Ol	Counting time (s) - per element					10	10	10	10			10	10	10	20	20
Ol	735B_58R3_108A	115 / 1 .	284.353	core	Ol-gabbro	37.0688	0.0114	0.0321	0.0396			0.4614	31.9769	30.1456	0.0302	0.1056	99.8716
Ol	735B_58R3_108A	116 / 1 .	284.353	core	Ol-gabbro	37.0837	0.0461	0	0.0312			0.4834	32.2939	30.2985	0.0221	0.115	100.374
Ol	735B_58R3_108A	117 / 1 .	284.353	core	Ol-gabbro	36.7575	0.0384	0.0416	0.0463			0.4085	31.4381	30.2846	0	0.0489	99.0639
Ol	735B_58R3_108A	119 / 1 .	284.353	core	Ol-gabbro	37.024	0	0.0111	0.061			0.516	31.936	30.8706	0	0.0458	100.465
Ol	735B_58R3_108A	120 / 1 .	284.353	core	Ol-gabbro	36.9954	0	0	0.03			0.4926	32.2648	30.559	0	0.0906	100.432
Ol	735B_58R3_108A	141 / 1 .	284.332	core	Ol-gabbro	37.1406	0.0577	0.0112	0.0109			0.4565	32.5566	29.324	0.0247	0.0327	99.6149
Ol	735B_58R3_108A	142 / 1 .	284.332	core	Ol-gabbro	37.3214	0	0	0.0393			0.4717	32.967	29.4602	0	0.0339	100.293
Ol	735B_58R3_108A	144 / 1 .	284.332	core	Ol-gabbro	37.2312	0.0096	0	0.068			0.4981	32.8658	29.1758	0	0.0636	99.9121
Ol	735B_60R4_115B	80 / 1 .	295.385	core	Ol-gabbro	37.9064	0.0097	0.0277	0.0348			0.4126	35.7688	25.4381	0.0049	0.1079	99.7109
Ol	735B_60R4_115B	82 / 1 .	295.385	core	Ol-gabbro	38.0489	0	0	0.0473			0.4319	35.5016	25.9216	0.0016	0.0547	100.008
Ol	735B_60R4_115B	96 / 1 .	295.397	core	Ol-gabbro	38.5096	0.0127	0.041	0.0511			0.3334	36.8961	24.6807	0	0.0697	100.594
Ol	735B_60R4_115B	3 / 1 .	295.387	core	Ol-gabbro	38.1193	0.0035	0	0.0571			0.3722	36.2859	25.3617	0.0664	0.06	100.326
Ol	735B_60R4_115B	20 / 1 .	295.388	core	Ol-gabbro	37.8238	0.0204	0.0441	0.0417			0.4099	35.5652	26.3433	0	0.0434	100.292
Ol	735B_60R4_115B	32 / 1 .	295.386	core	Ol-gabbro	38.0639	0	0.0098	0.0945			0.4242	35.3865	26.1744	0.0074	0.1336	100.294
Ol	735B_68R2_10.5A	1 / 1 .	336.546	core	Ol-gabbro	38.4678	0	0.0458	0.0402			0.3462	38.6699	22.2494	0.0312	0.1367	99.9872
Ol	735B_68R2_10.5A	3 / 1 .	336.546	core	Ol-gabbro	39.0021	0.0096	0.0228	0.0785			0.3158	38.6288	21.7691	0	0.0596	99.8863
Ol	735B_68R2_10.5A	7 / 1 .	336.546	core	Ol-gabbro	38.6191	0.0463	0	0.1087			0.3145	38.5231	21.8032	0.0122	0.1223	99.5494
Ol	735B_68R2_10.5A	14 / 1 .	336.543	core	Ol-gabbro	38.5449	0.0419	0.0632	0.0687			0.358	38.2765	21.881	0.0318	0.0714	99.3374
Ol	735B_68R2_10.5A	20 / 1 .	336.541	core	Ol-gabbro	38.6162	0.0184	0.0196	0.0263			0.3607	38.5093	21.701	0	0.1153	99.3668
Ol	735B_68R2_10.5A	23 / 1 .	336.541	core	Ol-gabbro	38.7169	0.0035	0	0.0288			0.3445	38.5947	22.1304	0	0.1264	99.9452
Ol	735B_68R2_10.5A	25 / 1 .	336.541	core	Ol-gabbro	38.9849	0	0	0.0179			0.4253	38.6877	21.9368	0.0286	0.1224	100.204
Ol	735B_68R2_10.5A	30 / 1 .	336.535	core	Ol-gabbro	38.2191	0	0	0.0193			0.3732	37.363	23.949	0	0.0899	100.013
Ol	735B_68R2_10.5A	47 / 1 .	336.537	core	Ol-gabbro	38.3915	0.027	0.0275	0.0302			0.297	38.1655	22.2434	0	0.0119	99.194
Ol	735B_68R2_10.5A	51 / 1 .	336.547	core	Ol-gabbro	39.0591	0	0.021	0.0411			0.3087	38.6067	21.9622	0.0374	0.1025	100.139
Ol	735B_68R2_10.5A	52 / 1 .	336.547	core	Ol-gabbro	39.0079	0.0061	0.031	0.0719			0.3688	38.878	21.7568	0.0172	0.0405	100.178
Ol	735B_68R2_10.5A	54 / 1 .	336.547	core	Ol-gabbro	38.7497	0	0	0.0577			0.3049	38.9688	21.9795	0.0196	0.0893	100.169
Ol	735B_68R2_10.5A	67 / 1 .	336.535	core	Ol-gabbro	38.5998	0.0246	0	0.0235			0.3402	37.8512	22.9552	0.0188	0.0988	99.9121
Ol	735B_73R5_9	3 / 1 .	371.123	core	Ol-gabbro	38.8212	0	0	0.0302			0.2566	39.4164	21.0934	0.0212	0.1517	99.7907
Ol	735B_73R5_9	5 / 1 .	371.123	core	Ol-gabbro	38.5923	0	0	0.0358			0.2525	39.6729	20.8905	0.0041	0.0939	99.542
Ol	735B_73R5_9	22 / 1 .	371.132	core	Ol-gabbro	38.574	0.0088	0	0.0318			0.3885	38.6376	21.9897	0	0.0688	99.6992
Ol	735B_73R5_9	24 / 1 .	371.132	core	Ol-gabbro	38.541	0.0105	0.0632	0.0618			0.3263	38.3305	21.5449	0.013	0.0877	98.9789
Ol	735B_73R5_9	36 / 1 .	371.135	core	Ol-gabbro	38.7361	0	0	0.0705			0.2576	39.0173	21.6438	0.0041	0.1004	99.8298
Ol	735B_73R5_9	62 / 1 .	371.15	core	Ol-gabbro	38.4217	0	0	0.0809			0.4136	38.4343	22.3195	0.0016	0.1204	99.792
Ol	735B_73R5_9	63 / 1 .	371.15	core	Ol-gabbro	38.516	0.007	0	0.052			0.2397	38.8991	21.8663	0	0.1083	99.6884
Ol	735B_75R5_27	5 / 1 .	390.357	core	Ol-gabbro	38.7866	0	0.0148	0.0504			0.2729	39.8942	21.3183	0	0.1358	100.473
Ol	735B_75R5_27	16 / 1 .	390.353	core	Ol-gabbro	38.8903	0.0026	0	0.0419			0.2837	39.8058	21.4717	0	0.1072	100.603
Ol	735B_75R5_27	34 / 1 .	390.353	core	Ol-gabbro	38.5748	0	0.0165	0.0336			0.3235	39.1199	21.8542	0.0025	0.0862	100.011
Ol	735B_75R5_27	35 / 1 .	390.353	core	Ol-gabbro	38.7169	0.0018	0.0181	0.0908			0.2984	39.149	21.5868	0	0.1073	99.9691
Ol	735B_75R5_27	50 / 1 .	390.347	core	Ol-gabbro	38.863	0.0071	0.0148	0.0491			0.3162	39.2471	21.4584	0.0167	0.055	100.027
Ol	735B_75R5_27	52 / 1 .	390.347	core	Ol-gabbro	38.9585	0.0097	0.0181	0.0658			0.2653	39.5164	21.3845	0	0.103	100.321
Ol	735B_75R5_27	59 / 1 .	390.342	core	Ol-gabbro	39.0221	0	0	0.0673			0.2923	39.4737	20.766	0	0.0726	99.694
Ol	735B_75R5_27	78 / 1 .	390.337	core	Ol-gabbro	38.9133	0	0.0247	0.0462			0.2828	39.3952	21.6178	0.0017	0.0939	100.376
Ol	735B_75R5_27	100 / 1 .	390.347	core	Ol-gabbro	39.0592	0.0106	0.0265	0.0155			0.3008	39.8523	21.0637	0.0143	0.0914	100.434
Ol	735B_75R5_27	101 / 1 .	390.347	core	Ol-gabbro	38.9834	0.0115	0	0.0197			0.3469	39.9776	21.5463	0.0067	0.098	100.99
Ol	735B_69R3_52B	2 / 1 .	344.129	core	Ol-gabbro	39.2644	0.0152	0	0.0795			0.3227	38.9454	22.101	0.016	0.1073	100.852
Ol	735B_69R3_52B	25 / 1 .	344.13	core	Ol-gabbro	38.7501	0.0152	0.0183	0.0695			0.3533	39.0069	22.4635	0	0.0487	100.725
Ol	735B_69R3_52B	34 / 1 .	344.136	core	Ol-gabbro	38.7113	0	0.0412	0.0028			0.3215	38.5461	22.4115	0	0.091	100.125
Ol	735B_69R3_52B	50 / 1 .	344.141	core	Ol-gabbro	38.5111	0.0118	0	0.0791			0.3763	37.6575	23.1438	0	0.0943	99.8739
Ol	735B_69R3_52B	51 / 1 .	344.141	core	Ol-gabbro	38.6115	0.0059	0.0252	0.0416			0.4192	38.5302	22.4524	0.0151	0.1105	100.212
Ol	735B_69R3_52B	67 / 1 .	344.135	core	Ol-gabbro	38.8549	0.0304	0	0			0.3445	38.3917	21.9996	0.0016	0.0996	99.7223
Ol	735B_69R3_52B	92 / 1 .	344.127	core	Ol-gabbro	39.0653	0.0303	0	0.0577			0.3316	38.1304	22.5664	0	0.0922	100.274
Ol	735B_58R3_108A	118 / 1 .	284.353	rim	Ol-gabbro	36.998	0	0	0.0518			0.4459	31.9479	29.9094	0	0.0683	99.4213
Ol	735B_58R3_108A	121 / 1 .	284.353	rim	Ol-gabbro	36.8809	0	0.0016	0.0368			0.5239	32.4299	29.9377	0.0095	0.0654	99.8857
Ol	735B_58R3_108A	143 / 1 .	284.332	rim	Ol-gabbro	37.073	0.0375	0	0.0312			0.4779	33.2218	29.1904	0	0.0783	100.11
Ol	735B_60R4_115B	79 / 1 .	295.385	rim	Ol-gabbro	38.2155	0.0009	0	0.0279			0.4053	36.1503	25.9733	0.0074	0.0396	100.82
Ol	735B_60R4_115B	81 / 1 .	295.385	rim	Ol-gabbro	37.7686	0	0.0163	0.0571			0.4023	35.049	26.3161	0	0.0967	99.7061
Ol	735B_60R4_115B	95 / 1 .	295.397	rim	Ol-gabbro	38.2488	0.0144	0	0.0551			0.4061	36.7983	24.3781	0.0135	0.069	99.9833
Ol	735B_60R4_115B	1 / 1 .	295.387	rim	Ol-gabbro	38.1367	0.0153	0.0316	0.0673			0.365	36.4268	25.1275	0.0238	0.0896	100.284
Ol	735B_60R4_115B	2 / 1 .	295.387	rim	Ol-gabbro	38.1022	0.0026	0	0.007			0.4315	35.9522	25.4566	0	0.0882	100.04
Ol	735B_60R4_115B	21 / 1 .	295.388	rim	Ol-gabbro	37.8572	0.0176	0	0.0461			0.3585	35.6279	26.188	0	0.0588	100.154
Ol	735B_60R4_115B	31 / 1 .	295.386	rim	Ol-gabbro	37.9534	0.0026	0.0277	0.0236			0.3993	35.353	26.1839	0.0033	0.1427	100.09
Ol	735B_68R2_10.5A	2 / 1 .	336.546	rim	Ol-gabbro	38.6271	0.0026	0	0.0609			0.331	38.5664	21.8295	0.0025	0.0989	99.5189
Ol	735B_68R2_10.5A	4 / 1 .	336.546	rim	Ol-gabbro	38.6638	0.0096	0.0178	0.0343			0.3333	38.6103	21.9686	0.0383	0.1412	99.8172
Ol	735B_68R2_10.5A	5 / 1 .	336.546	rim	Ol-gabbro	38.8548	0	0	0.018			0.3848	38.3668	21.9859	0	0.0765	99.6868
Ol	735B_68R2_10.5A	6 / 1 .	336.546	rim	Ol-gabbro	38.6182	0.0218	0	0.0165			0.3537	38.3228	21.9575	0.0033	0.0982	99.392
Ol	735B_68R2_10.5A	12 / 1 .	336.543	rim	Ol-gabbro	38.4177	0.0229	0.0408	0.0055			0.313	38.6939	21.8698	0	0.0764	99.44
Ol	735B_68R2_10.5A	13 / 1 .	336.543	rim	Ol-gabbro	38.5645	0.0087	0	0.048			0.2893	38.2982	21.696	0	0.0876	98.9923
Ol	735B_68R2_10.5A	21 / 1 .	336.541	rim	Ol-gabbro	38.893	0	0	0.0388			0.2793	38.9057	21.1386	0	0.1111	99.3665
Ol	735B_68R2_10.5A	22 / 1 .	336.541	rim	Ol-gabbro	38.9045	0	0.0227	0.0316			0.3444	38.2	21.6427	0	0.1056	99.2515
Ol	735B_68R2_10.5A	24 / 1 .	336.541	rim	Ol-gabbro	38.6601	0.0201	0	0.0233			0.3003	38.8678	21.7735	0.0065	0.11	99.7616
Ol	735B_68R2_10.5A	48 / 1 .	336.537	rim	Ol-gabbro	38.7857	0	0.0293	0.0442			0.3815	37.8923	22.4139	0.0057	0.1272	99.6798
Ol	735B_68R2_10.5A	50 / 1 .	336.547	rim	Ol-gabbro	38.75	0.0369	0.0441	0.0194			0.3431	38.542	21.8811	0	0.0868	99.7034
Ol	735B_68R2_10.5A	53 / 1 .	336.547	rim	Ol-gabbro	39.0825	0.0114	0.0081	0.0289			0.4314	38.8508	21.6259	0	0.0984	100.137
Ol	735B_68R2_10.5A	68 / 1 .	336.535	rim	Ol-gabbro	38.9193	0.0158	0.0196	0.0415			0.2911	38.0275	22.1228	0	0.1049	99.5425
Ol	735B_73R5_9	2 / 1 .	371.123	rim	Ol-gabbro	39.0566	0.0079	0	0.0264			0.2852	39.7831	19.9509	0.0124	0.1488	99.2713
Ol	735B_73R5_9	4 / 1 .	371.123	rim	Ol-gabbro	38.7146	0.0218	0.0227	0.0604			0.3122	39.0873	21.7285	0.0432	0.0803	100.071
Ol	735B_73R5_9	6 / 1 .	371.123	rim	Ol-gabbro	38.4889	0	0	0.0496			0.2905	39.7386	21.343	0	0.1207	100.031
Ol	735B_73R5_9	23 / 1 .	371.132	rim	Ol-gabbro	38.7	0	0.0049	0.0592			0.3587	39.1218	21.4117	0	0.1134	99.7697
Ol	735B_73R5_9	37 / 1 .	371.135	rim	Ol-gabbro	39.006	0.007	0.0211	0.0576			0.3544	38.9385	21.8981	0.0081	0.0981	100.389
Ol	735B_73R5_9	40 / 1 .	371.135	rim	Ol-gabbro	38.4394	0.0132	0.0016	0.0595			0.3829	38.8841	21.478	0.0189	0.1258	99.4034
Ol	735B_73R5_9	64 / 1 .	371.15	rim	Ol-gabbro	38.5864	0.021	0	0.066			0.3256	39.1979	21.8432	0	0.1713	100.211
Ol	735B_75R5_27	6 / 1 .	390.357	rim	Ol-gabbro	39.2978	0.0044	0.0462	0.0322			0.2979	39.6846	21.1663	0.0142	0.0855	100.629
Ol	735B_75R5_27	7 / 1 .	390.357	rim	Ol-gabbro	39.095	0.0203	0	0.0394			0.2752	39.6204	21.1569	0.0042	0.1126	100.324
Ol	735B_75R5_27	17 / 1 .	390.353	rim	Ol-gabbro	39.218	0.0185	0	0.0364			0.2636	39.6576	21.0286	0	0.0595	100.282
Ol	735B_75R5_27	51 / 1 .	390.347	rim	Ol-gabbro	38.8479	0.0098	0.0083	0.0707			0.3377	39.5456	21.4549	0.005	0.104	100.384
Ol	735B_75R5_27	60 / 1 .	390.342	rim	Ol-gabbro	38.6805	0.0088	0.0397	0.0253			0.2862	39.8169	20.51	0	0.1018	99.4692
Ol	735B_75R5_27	61 / 1 .	390.342	rim	Ol-gabbro	39.3369	0.0018	0.0644	0.0014			0.2891	40.2869	20.6349	0.0435	0.1025	100.761
Ol	735B_75R5_27	62 / 1 .	390.342	rim	Ol-gabbro	38.5555	0.0044	0.0033	0.0168			0.3288	39.7004	20.9006	0.0466	0.1516	99.708
Ol	735B_75R5_27	77 / 1 .	390.337	rim	Ol-gabbro	39.0617	0	0.0329	0.0504			0.2378	39.5912	21.3982	0	0.077	100.449
Ol	735B_75R5_27	99 / 1 .	390.347	rim	Ol-gabbro	38.9126	0.0122	0	0.039			0.2334	39.5295	21.5812	0.048	0.0508	100.407
Ol	735B_69R3_52B	1 / 1 .	344.129	rim	Ol-gabbro	38.8653	0	0	0.0483			0.3177	38.4734	22.3798	0.0318	0.1016	100.218
Ol	735B_69R3_52B	26 / 1 .	344.13	rim	Ol-gabbro	38.9743	0.0026	0.0099	0			0.3692	39.0331	22.1254	0	0.1024	100.617
Ol	735B_69R3_52B	27 / 1 .	344.13	rim	Ol-gabbro	38.7337	0	0	0.0284			0.3278	38.5721	22.545	0	0.1053	100.312
Ol	735B_69R3_52B	33 / 1 .	344.136	rim	Ol-gabbro	38.6211	0.0246	0.0206	0.0675			0.2825	38.5154	22.0046	0.0144	0.1118	99.6625
Ol	735B_69R3_52B	52 / 1 .	344.141	rim	Ol-gabbro	39.0721	0.0008	0	0.0632			0.322	38.2503	22.6321	0	0.1121	100.453
Ol	735B_69R3_52B	65 / 1 .	344.135	rim	Ol-gabbro	39.0493	0.0152	0.0518	0.0569			0.3072	38.7877	22.5061	0.0448	0.1218	100.941
Ol	735B_69R3_52B	66 / 1 .	344.135	rim	Ol-gabbro	38.7371	0.0116	0.0384	0.0256			0.2395	38.1779	22.4233	0	0.1092	99.7626
Ol	735B_69R3_52B	91 / 1 .	344.127	rim	Ol-gabbro	38.8498	0	0	0.0283			0.3245	38.4007	22.7801	0	0.158	100.541
Ol	735B_80R1_136	86 / 1 .	425.363	core	Ol-gabbro	33.4013	0.0162	0.0439	0.0339			0.8184	15.8393	49.8093	0	0.0216	99.9839
Ol	735B_80R1_136	102 / 1 .	425.37	core	Ol-gabbro	33.5402	0.0242	0.0599	0.0172			0.7438	18.7712	46.7072	0	0.0029	99.8666
Ol	735B_80R1_136	107 / 1 .	425.372	core	Ol-gabbro	34.4936	0.0077	0.0108	0.0688			0.7278	21.9866	42.0123	0.0165	0.0595	99.3836
Ol	735B_80R1_136	118 / 1 .	425.374	core	Ol-gabbro	37.3619	0.0035	0	0.0548			0.4502	33.8773	27.6662	0.008	0.0581	99.48
Ol	735B_80R1_136	139 / 1 .	425.382	core	Ol-gabbro	39.2785	0.0289	0	0.0886			0.2442	42.0032	18.2246	0	0.0868	99.9548
Ol	735B_80R1_136	165 / 1 .	425.387	core	Ol-gabbro	39.186	0	0	0.0594			0.319	41.8524	18.3744	0.0223	0.139	99.9525
Ol	735B_81R5_7	21 / 1 .	439.247	core	Ol-gabbro	38.3654	0	0	0.0332			0.2987	37.8715	23.371	0	0.1064	100.046
Ol	735B_81R5_7	22 / 1 .	439.247	core	Ol-gabbro	38.6266	0.0009	0.031	0.0526			0.3443	37.6473	22.9562	0.0188	0.0795	99.7572
Ol	735B_81R5_7	37 / 1 .	439.252	core	Ol-gabbro	38.5013	0	0.0326	0.0799			0.3031	38.9254	21.6319	0	0.1284	99.6026
Ol	735B_81R5_7	39 / 1 .	439.252	core	Ol-gabbro	38.7143	0	0.0712	0.0151			0.3498	38.658	21.6595	0.0179	0.0638	99.5496
Ol	735B_81R5_7	67 / 1 .	439.257	core	Ol-gabbro	38.6403	0.021	0	0.0868			0.2905	38.9391	21.3224	0	0.1388	99.4389
Ol	735B_81R5_7	68 / 1 .	439.258	core	Ol-gabbro	39.1034	0	0	0.0662			0.3259	39.4435	21.2041	0	0.0612	100.204
Ol	735B_81R5_7	69 / 1 .	439.258	core	Ol-gabbro	38.7899	0.0044	0.0179	0.0718			0.305	39.2466	21.1521	0	0.1285	99.7162
Ol	735B_79R3_100	2 / 1 .	418.507	core	Ol-gabbro	39.5746	0.042	0	0.0166			0.3511	40.2353	20.0768	0	0.1764	100.473
Ol	735B_79R3_100	5 / 1 .	418.507	core	Ol-gabbro	39.1688	0.0394	0	0.0787			0.2779	40.1535	19.9397	0.0198	0.0897	99.7675
Ol	735B_79R3_100	17 / 1 .	418.509	core	Ol-gabbro	38.6125	0.0061	0	0.0124			0.285	38.6374	22.1019	0.0285	0.1535	99.8373
Ol	735B_79R3_100	18 / 1 .	418.503	core	Ol-gabbro	38.4314	0.0211	0.0082	0.0581			0.3024	38.3998	22.2193	0.0197	0.1499	99.6099
Ol	735B_79R3_100	19 / 1 .	418.503	core	Ol-gabbro	38.6674	0.0114	0	0.0467			0.3191	38.5584	22.3127	0.0155	0.1131	100.044
Ol	735B_79R3_100	33 / 1 .	418.506	core	Ol-gabbro	38.6316	0.0035	0.0049	0.0055			0.2915	39.6782	21.4472	0	0.1259	100.188
Ol	735B_79R3_100	61 / 1 .	418.526	core	Ol-gabbro	38.8861	0	0	0.0777			0.2968	39.9876	20.9438	0.0363	0.1231	100.351
Ol	735B_79R3_100	63 / 1 .	418.526	core	Ol-gabbro	38.5701	0.022	0.0442	0.079			0.2849	39.0561	21.1009	0.0058	0.0961	99.2591
Ol	735B_79R3_100	67 / 1 .	418.526	core	Ol-gabbro	38.9766	0.0018		0.0723				40.2004	20.7421			99.9932
Ol	735B_76R3_96	44 / 1 .	397.581	core	Ol-gabbro	38.9372	0.0399	0.0333	0.027			0.4207	38.1975	22.7844	0	0.0765	100.516
Ol	735B_76R3_96	53 / 1 .	397.583	core	Ol-gabbro	38.6602	0.0168	0.0494	0.0252			0.316	38.8362	22.7687	0.0116	0.0711	100.755
Ol	735B_76R3_96	75 / 1 .	397.585	core	Ol-gabbro	38.5619	0	0.0049	0.0237			0.3247	37.5694	23.5834	0.0248	0.0518	100.145
Ol	735B_76R3_96	96 / 1 .	397.577	core	Ol-gabbro	38.446	0	0	0.0504			0.3633	38.2966	23.4608	0.0365	0.0909	100.745
Ol	735B_76R3_96	98 / 1 .	397.577	core	Ol-gabbro	38.6179	0.0088	0.0478	0.0715			0.3243	38.3282	22.5285	0.0433	0.0451	100.015
Ol	735B_76R3_96	107 / 1 .	397.575	core	Ol-gabbro	38.3388	0	0	0.0224			0.333	37.9713	23.1574	0.0091	0.048	99.88
Ol	735B_79R4_20	105 / 1 .	419.152	core	Ol-gabbro	39.1594	0.0177	0	0			0.3055	39.893	20.7177	0	0.0961	100.189
Ol	735B_79R4_20	106 / 1 .	419.152	core	Ol-gabbro	39.4784	0.0133	0.0033	0.0592			0.2197	40.074	20.2518	0.005	0.1505	100.255
Ol	735B_79R4_20	6 / 1 .	419.159	core	Ol-gabbro	39.7027	0.0099	0	0.0158			0.2885	41.8162	18.1737	0	0.1288	100.136
Ol	735B_79R4_20	7 / 1 .	419.159	core	Ol-gabbro	39.6974	0.0221	0	0.0254			0.2733	42.1069	18.1753	0	0.1565	100.457
Ol	735B_79R4_20	9 / 1 .	419.159	core	Ol-gabbro	39.3618	0.0274	0.0349	0.0409			0.2781	41.6205	18.2984	0	0.1435	99.8055
Ol	735B_79R4_20	18 / 1 .	419.159	core	Ol-gabbro	39.8769	0.037	0	0.0253			0.3182	41.7107	18.4329	0.0362	0.1455	100.583
Ol	735B_79R4_20	33 / 1 .	419.163	core	Ol-gabbro	39.6051	0	0.076	0.0287			0.2899	40.8288	19.4644	0.0163	0.1764	100.486
Ol	735B_79R4_20	35 / 1 .	419.163	core	Ol-gabbro	39.486	0	0	0.0888			0.2834	40.8748	18.9967	0.0034	0.1566	99.8897
Ol	735B_79R4_20	61 / 1 .	419.172	core	Ol-gabbro	39.3889	0.0613	0	0.0408			0.3181	40.8558	19.092	0.0187	0.1139	99.8895
Ol	735B_79R4_20	63 / 1 .	419.172	core	Ol-gabbro	39.3087	0	0	0.0508			0.282	41.9668	18.114	0	0.1058	99.8281
Ol	735B_79R4_20	64 / 1 .	419.172	core	Ol-gabbro	39.804	0	0.0431	0.0366			0.2059	41.8175	18.1857	0	0.1281	100.221
Ol	735B_79R4_20	79 / 1 .	419.174	core	Ol-gabbro	39.6332	0	0.0017	0.0186			0.2329	41.998	17.8636	0.0197	0.1199	99.8876
Ol	735B_79R4_20	80 / 1 .	419.174	core	Ol-gabbro	39.6377	0.0017	0.0192	0.0217			0.2885	42.0926	17.5982	0	0.1297	99.7893
Ol	735B_79R4_20	86 / 1 .	419.179	core	Ol-gabbro	39.6614	0.0036	0.0169	0.0258			0.2807	42.4925	18.1667	0	0.1363	100.784
Ol	735B_79R4_20	90 / 1 .	419.179	core	Ol-gabbro	39.7327	0.0027	0	0.0515			0.3049	41.9063	17.8274	0	0.1026	99.9281
Ol	735B_83R7_43B	4 / 1 .	461.682	core	Ol-gabbro	39.6099	0	0	0.02			0.3224	42.7023	18.101	0	0.1582	100.914
Ol	735B_83R7_43B	17 / 1 .	461.697	core	Ol-gabbro	39.7102	0.0309	0.0216	0.0339			0.3513	42.0245	18.3822	0	0.1727	100.727
Ol	735B_83R7_43B	27 / 1 .	461.701	core	Ol-gabbro	39.9026	0	0.015	0.0369			0.2629	42.1024	17.8628	0	0.1103	100.293
Ol	735B_83R7_43B	29 / 1 .	461.701	core	Ol-gabbro	39.8513	0.0239	0	0.0481			0.2232	41.7453	18.3942	0.0161	0.1924	100.494
Ol	735B_83R7_43B	42 / 1 .	461.7	core	Ol-gabbro	39.839	0.0266	0	0.0834			0.3313	41.4625	19.0933	0	0.1223	100.958
Ol	735B_83R7_43B	52 / 1 .	461.702	core	Ol-gabbro	39.5808	0	0.0101	0.0472			0.2654	41.6733	18.2884	0.0111	0.1244	100.001
Ol	735B_83R7_43B	54 / 1 .	461.702	core	Ol-gabbro	39.954	0.011	0.0191	0.054			0.3346	41.7112	18.4216	0	0.166	100.671
Ol	735B_83R7_43B	56 / 1 .	461.702	core	Ol-gabbro	39.4185	0	0	0.0121			0.2726	41.8188	18.6923	0.0225	0.1624	100.399
Ol	735B_83R7_43B	60 / 1 .	461.692	core	Ol-gabbro	39.7065	0.0236	0.0032	0.031			0.3222	41.8014	18.0982	0.0177	0.1678	100.172
Ol	735B_83R7_43B	62 / 1 .	461.692	core	Ol-gabbro	39.5377	0.0044	0.0249	0.0661			0.2691	42.1494	18.4133	0	0.1937	100.659
Ol	735B_83R7_43B	73 / 1 .	461.69	core	Ol-gabbro	39.6549	0	0	0.0478			0.2723	42.0673	18.3644	0.0236	0.15	100.58
Ol	735B_83R7_43B	74 / 1 .	461.688	core	Ol-gabbro	39.9066	0.0177	0	0.0339			0.284	42.4334	17.9035	0.044	0.1344	100.758
Ol	735B_83R7_43B	92 / 1 .	461.69	core	Ol-gabbro	39.5437	0.0354	0.0166	0			0.2943	41.5224	18.6022	0.0279	0.1298	100.172
Ol	735B_83R7_43B	100 / 1 .	461.689	core	Ol-gabbro	39.1022	0	0	0.0719			0.2539	41.2836	18.4545	0.0059	0.1488	99.3208
Ol	735B_83R7_43B	101 / 1 .	461.689	core	Ol-gabbro	39.5841	0.0142	0.0067	0.041			0.2633	42.2862	18.0491	0	0.1552	100.4
Ol	735B_80R2_51	1 / 1 .	425.987	core	Ol-gabbro	39.4562	0.0263	0.0654	0.0636			0.2698	42.4212	17.7286	0.0114	0.1037	100.146
Ol	735B_80R2_51	3 / 1 .	425.987	core	Ol-gabbro	39.8768	0.0102	0	0.0381			0.2698	41.7871	17.5118	0	0.1207	99.6145
Ol	735B_80R2_51	5 / 1 .	425.987	core	Ol-gabbro	39.8214	0.0128	0	0.0544			0.3035	41.7954	17.5798	0	0.1643	99.7316
Ol	735B_80R2_51	15 / 1 .	425.992	core	Ol-gabbro	39.6852	0.0136	0.0064	0.0366			0.2643	41.4112	17.7901	0.0081	0.1365	99.352
Ol	735B_80R2_51	17 / 1 .	425.992	core	Ol-gabbro	39.7727	0.0221	0.0249	0.0621			0.3049	41.5737	18.2188	0	0.1443	100.124
Ol	735B_80R2_51	19 / 1 .	425.992	core	Ol-gabbro	39.7949	0	0.0112	0.0313			0.3287	41.9443	17.903	0.0041	0.1219	100.139
Ol	735B_80R2_51	20 / 1 .	425.992	core	Ol-gabbro	39.6572	0.011	0	0.0338			0.2783	42.1954	18.1779	0.0122	0.1339	100.5
Ol	735B_80R2_51	21 / 1 .	425.992	core	Ol-gabbro	39.4959	0.0119	0	0.0068			0.267	41.4053	17.9396	0	0.1344	99.2609
Ol	735B_80R2_51	37 / 1 .	425.999	core	Ol-gabbro	39.522	0.0045	0	0.0515			0.3989	41.9358	18.6729	0	0.1409	100.727
Ol	735B_80R2_51	39 / 1 .	425.999	core	Ol-gabbro	39.5951	0.0051	0	0.0379			0.2501	41.1337	18.1396	0.0024	0.1678	99.3317
Ol	735B_80R2_51	40 / 1 .	425.999	core	Ol-gabbro	39.7049	0.0321	0.0685	0.0162			0.3389	41.3206	18.5499	0	0.1581	100.189
Ol	735B_80R2_51	55 / 1 .	425.994	core	Ol-gabbro	39.2702	0	0	0.0099			0.2552	40.9095	19.3098	0	0.1684	99.923
Ol	735B_80R2_51	56 / 1 .	425.994	core	Ol-gabbro	39.204	0.0089	0.0067	0.0353			0.3232	40.7964	18.898	0.0135	0.1585	99.4445
Ol	735B_80R2_51	58 / 1 .	425.994	core	Ol-gabbro	39.2995	0.0025	0.0237	0.0389			0.3046	39.8044	20.4968	0	0.1578	100.128
Ol	735B_80R2_51	59 / 1 .	425.994	core	Ol-gabbro	39.2642	0.0404	0.0101	0.0243			0.3184	40.6709	19.3512	0	0.1472	99.8267
Ol	735B_80R2_51	74 / 1 .	425.996	core	Ol-gabbro	39.6124	0.0009	0.0151	0.0271			0.3094	40.9017	18.7641	0.0009	0.1101	99.7417
Ol	735B_80R2_51	75 / 1 .	425.996	core	Ol-gabbro	39.56	0	0.0135	0.0314			0.2471	41.0108	18.6324	0.035	0.1499	99.6801
Ol	735B_80R2_51	82 / 1 .	426.002	core	Ol-gabbro	39.3763	0	0.0336	0.0353			0.2439	41.8078	18.1538	0	0.139	99.7897
Ol	735B_80R2_51	85 / 1 .	426.002	core	Ol-gabbro	39.4605	0.0221	0.0017	0.0297			0.3493	41.4305	18.5597	0.0194	0.146	100.019
Ol	735B_80R2_51	86 / 1 .	426.002	core	Ol-gabbro	39.5604	0.0327	0.0366	0.0254			0.3082	41.3141	17.9978	0	0.1965	99.4717
Ol	735B_90R2_18	5	509.49	core	Ol-gabbro	38.9005	0	0.0168	0.0524			0.2978	42.3901	17.505	0	0.1281	99.2907
Ol	735B_90R2_18	15	509.49	core	Ol-gabbro	39.1237	0	0.0219	0.0567			0.3092	42.514	17.9424	0	0.1264	100.094
Ol	735B_90R2_18	19	509.49	core	Ol-gabbro	39.1701	0	0.0194	0.0368			0.2534	41.928	17.5956	0	0.1438	99.1471
Ol	735B_90R2_18	28	509.49	core	Ol-gabbro	39.158	0	0	0.0412			0.295	42.6104	17.824	0.0131	0.1338	100.075
Ol	735B_90R2_18	38	509.49	core	Ol-gabbro	38.9295	0	0.0187	0.0379			0.3116	42.2923	18.178	0.0136	0.1667	99.9483
Ol	735B_90R2_18	44	509.49	core	Ol-gabbro	38.914	0.0072	0	0.0377			0.2857	41.9261	18.4482	0	0.1383	99.7572
Ol	735B_90R2_18	45	509.49	core	Ol-gabbro	39.0099	0.0067	0	0.0482			0.2827	42.5772	17.9654	0	0.1585	100.049
Ol	735B_90R2_18	57	509.49	core	Ol-gabbro	39.105	0	0.0006	0.0518			0.3033	42.5781	17.4577	0.021	0.1146	99.6321
Ol	735B_90R2_18	61	509.49	core	Ol-gabbro	39.0644	0.0191	0	0.047			0.3115	42.5139	17.4599	0	0.1115	99.5273
Ol	735B_90R2_18	67	509.49	core	Ol-gabbro	39.1125	0.0212	0	0.0421			0.3036	42.4777	17.51	0	0.1524	99.6195
Ol	735B_90R2_82	50	510.1	core	Ol-gabbro	39.599	0	0.0327	0.0557			0.271	44.1078	15.387	0.0157	0.1498	99.6187
Ol	735B_90R2_82	51	510.1	core	Ol-gabbro	39.6657	0.0091	0.0371	0.0546			0.2644	44.3213	15.225	0.0023	0.1419	99.7214
Ol	735B_90R2_82	80	510.1	core	Ol-gabbro	39.3332	0.0273	0.0113	0.05			0.2623	43.1876	16.298	0	0.1342	99.3039
Ol	735B_90R2_82	82	510.1	core	Ol-gabbro	39.2172	0.0244	0	0.0399			0.2451	43.0287	16.4641	0.0278	0.1581	99.2053
Ol	735B_90R2_82	93	510.1	core	Ol-gabbro	39.6885	0	0.012	0.0476			0.271	43.1986	16.144	0.019	0.1468	99.5275
Ol	735B_90R2_82	98	510.1	core	Ol-gabbro	39.0645	0.0284	0.0267	0.0389			0.3138	42.698	17.2549	0.0084	0.1689	99.6025
Ol	735B_90R2_82	115	510.1	core	Ol-gabbro	39.37	0.0057	0.0293	0.0502			0.2751	42.8999	16.3985	0.0191	0.1397	99.1875
Ol	735B_90R2_82	123	510.1	core	Ol-gabbro	38.9773	0	0.0094	0.0456			0.296	42.5037	17.2139	0	0.1407	99.1866
Ol	735B_90R2_84	177	510.17	core	Ol-gabbro	39.6804	0	0	0.0519			0.2784	42.9366	16.5489	0	0.1322	99.6284
Ol	735B_90R2_84	178	510.17	core	Ol-gabbro	39.5929	0.0301	0.005	0.0606			0.3184	43.233	16.5672	0.0174	0.1314	99.956
Ol	735B_90R2_84	209	510.17	core	Ol-gabbro	39.4659	0.0074	0	0.051			0.268	42.8617	17.0106	0.0208	0.1437	99.8291
Ol	735B_90R2_84	215	510.17	core	Ol-gabbro	39.1659	0.0046	0.0097	0.0557			0.2479	42.1003	17.1072	0.0032	0.1557	98.8502
Ol	735B_90R2_94B	5	510.27	core	Ol-gabbro	39.3216	0.0108	0.0017	0.0436			0.2491	44.3972	14.8436	0.0063	0.178	99.0519
Ol	735B_90R2_94B	24	510.27	core	Ol-gabbro	39.5462	0.0283	0.0175	0.0511			0.2696	43.5054	16.0904	0.0168	0.1623	99.6876
Ol	735B_90R2_94B	27	510.27	core	Ol-gabbro	39.531	0.0057	0	0.044			0.229	44.0978	15.2581	0	0.1692	99.3348
Ol	735B_90R2_94B	42	510.27	core	Ol-gabbro	39.6184	0.0096	0.0307	0.0501			0.2413	44.6094	15.0382	0	0.1606	99.7583
Ol	735B_90R2_94B	51	510.27	core	Ol-gabbro	39.5594	0	0.0088	0.0482			0.2079	44.2437	15.208	0.0087	0.1834	99.4681
Ol	735B_90R2_94B	60	510.27	core	Ol-gabbro	39.6583	0.0057	0.0057	0.034			0.23	44.4585	14.9872	0	0.182	99.5614
Ol	735B_90R2_94B	1	510.27	core	Ol-gabbro	39.2213	0	0.0218	0.0476			0.2629	44.6586	14.9579	0	0.1474	99.3175
Ol	735B_90R2_123	82	510.56	core	Ol-gabbro	39.3307	0.0233	0	0.0452			0.2268	43.4257	16.0021	0.0195	0.1628	99.2361
Ol	735B_90R2_123	97	510.56	core	Ol-gabbro	39.9317	0.0175	0	0.032			0.2419	43.8352	15.5202	0.019	0.1811	99.7786
Ol	735B_90R2_123	98	510.56	core	Ol-gabbro	39.5132	0.0078	0.0217	0.0347			0.2532	43.9082	15.596	0	0.1308	99.4656
Ol	735B_90R2_123	105	510.56	core	Ol-gabbro	39.6683	0	0.0252	0.0423			0.2752	43.7598	15.776	0.0455	0.1525	99.7448
Ol	735B_90R2_123	116	510.56	core	Ol-gabbro	39.4794	0.0052	0.0074	0.0423			0.2763	43.1945	16.4359	0	0.1633	99.6043
Ol	735B_90R2_123	123	510.56	core	Ol-gabbro	39.3854	0.0119	0.0108	0.0498			0.2503	42.9833	16.4844	0	0.1587	99.3346
Ol	735B_90R2_123	124	510.56	core	Ol-gabbro	39.5033	0	0	0.0484			0.2761	43.2274	16.4306	0	0.1787	99.6645
Ol	735B_90R2_123	133	510.56	core	Ol-gabbro	39.5791	0.0187	0.0115	0.0331			0.2586	44.0628	15.7008	0.0122	0.1515	99.8283
Ol	735B_90R2_135	136	510.67	core	Ol-gabbro	39.1144	0.0249	0.0349	0.0294			0.2598	44.0039	15.7163	0.0095	0.1525	99.3456
Ol	735B_90R2_135	144	510.67	core	Ol-gabbro	39.6495	0.0072	0.024	0.0494			0.245	44.1556	15.3184	0	0.1623	99.6114
Ol	735B_90R2_135	145	510.67	core	Ol-gabbro	39.6581	0.0046	0.0206	0.0459			0.2526	43.9366	15.2096	0.009	0.1297	99.2667
Ol	735B_90R3_6	10	510.84	core	Ol-gabbro	39.439	0	0	0.0664			0.2646	44.2473	15.4862	0.0064	0.1751	99.685
Ol	735B_90R3_6	23	510.84	core	Ol-gabbro	39.3044	0.0243	0	0.0522			0.277	43.3999	16.4626	0	0.1798	99.7002
Ol	735B_90R3_6	27	510.84	core	Ol-gabbro	39.3501	0.015	0.0325	0.0371			0.251	43.9584	15.9468	0	0.1718	99.7627
Ol	735B_90R3_6	31	510.84	core	Ol-gabbro	39.5865	0.0171	0.0126	0.0115			0.2442	44.0637	15.5184	0	0.1582	99.6122
Ol	735B_90R3_6	39	510.84	core	Ol-gabbro	39.3477	0.0285	0	0.0349			0.243	43.813	15.2058	0.0159	0.1554	98.8442
Ol	735B_90R3_6	40	510.84	core	Ol-gabbro	39.5725	0.0088	0.0086	0.0448			0.2641	44.7143	15.3933	0.0218	0.1347	100.163
Ol	735B_90R3_6	41	510.84	core	Ol-gabbro	39.7209	0.0181	0.0229	0.0477			0.2594	44.512	15.084	0	0.1313	99.7963
Ol	735B_90R3_6	45	510.84	core	Ol-gabbro	39.5739	0.016	0.032	0.0347			0.289	44.4467	14.7789	0.0095	0.1602	99.3409
Ol	735B_90R3_6	59	510.84	core	Ol-gabbro	39.7527	0.0192	0	0.0471			0.2862	44.7422	14.9132	0.0266	0.1775	99.9647
Ol	735B_90R3_6	74	510.84	core	Ol-gabbro	39.4133	0.0031	0.0356	0.0499			0.2474	44.0109	15.3083	0	0.148	99.2165
Ol	735B_80R1_136	106 / 1 .	425.372	rim	Ol-gabbro	34.6618	0	0.0062	0.0958			0.7215	21.6723	43.096	0.0038	0.0394	100.297
Ol	735B_80R1_136	108 / 1 .	425.372	rim	Ol-gabbro	34.067	0.0077	0.0077	0.0661			0.7314	20.4277	44.0498	0	0.0261	99.3835
Ol	735B_80R1_136	119 / 1 .	425.374	rim	Ol-gabbro	37.4015	0.0183	0	0.038			0.4533	33.7622	28.0073	0.027	0.0827	99.7903
Ol	735B_80R1_136	125 / 1 .	425.38	rim	Ol-gabbro	38.2598	0.0105	0.0113	0.0839			0.4523	37.0643	24.1926	0	0.0597	100.134
Ol	735B_80R1_136	126 / 1 .	425.38	rim	Ol-gabbro	38.7627	0.0088	0.0016	0.0818			0.3284	40.0523	20.1924	0	0.1141	99.5421
Ol	735B_80R1_136	138 / 1 .	425.382	rim	Ol-gabbro	39.4822	0.0273	0.0197	0.064			0.3633	41.4122	18.4226	0.0233	0.0752	99.8898
Ol	735B_80R1_136	166 / 1 .	425.387	rim	Ol-gabbro	39.3021	0.0105	0	0.0097			0.271	41.3665	17.9718	0.0091	0.1403	99.081
Ol	735B_80R1_136	167 / 1 .	425.387	rim	Ol-gabbro	39.1741	0	0	0.0362			0.3314	41.5859	18.573	0.0174	0.1503	99.8683
Ol	735B_81R5_7	20 / 1 .	439.247	rim	Ol-gabbro	38.4193	0	0.0162	0.0536			0.3643	38.0867	23.2371	0.0187	0.0805	100.276
Ol	735B_81R5_7	23 / 1 .	439.247	rim	Ol-gabbro	38.8541	0.0044	0.0423	0.0799			0.369	37.4643	22.965	0.0106	0.1195	99.9091
Ol	735B_81R5_7	38 / 1 .	439.252	rim	Ol-gabbro	38.6618	0.0245	0	0.0276			0.2677	38.9709	21.3375	0	0.1404	99.4304
Ol	735B_81R5_7	40 / 1 .	439.252	rim	Ol-gabbro	38.5178	0.021	0.0114	0.0633			0.3124	39.6504	21.3146	0.0131	0.1148	100.019
Ol	735B_81R5_7	66 / 1 .	439.257	rim	Ol-gabbro	38.785	0.0044	0	0.0317			0.316	38.9976	21.0231	0.0041	0.0969	99.2588
Ol	735B_81R5_7	70 / 1 .	439.258	rim	Ol-gabbro	38.6704	0	0.0097	0.0137			0.3064	39.5708	20.7963	0	0.1025	99.4698
Ol	735B_79R3_100	3 / 1 .	418.507	rim	Ol-gabbro	39.1013	0.0079	0	0.0541			0.2174	40.0025	20.0474	0.0297	0.1231	99.5834
Ol	735B_79R3_100	4 / 1 .	418.507	rim	Ol-gabbro	39.3432	0.0017	0.0033	0.08			0.2951	40.609	20.0303	0	0.1761	100.539
Ol	735B_79R3_100	60 / 1 .	418.526	rim	Ol-gabbro	38.8502	0.0009	0.0082	0.0485			0.313	39.1033	20.8355	0	0.114	99.2736
Ol	735B_79R3_100	62 / 1 .	418.526	rim	Ol-gabbro	38.6622	0.0053	0.0164	0.054			0.3189	40.1484	20.9307	0.0041	0.1305	100.27
Ol	735B_79R3_100	68 / 1 .	418.532	rim	Ol-gabbro	38.7945	0.0114	0.023	0.0638			0.2884	39.9658	20.1086	0.0091	0.1486	99.4132
Ol	735B_79R3_100	69 / 1 .	418.532	rim	Ol-gabbro	38.9994	0.0325	0	0.054			0.2544	40.0497	20.5802	0	0.1019	100.072
Ol	735B_76R3_96	43 / 1 .	397.581	rim	Ol-gabbro	38.4721	0	0.0082	0.028			0.3585	38.2389	22.8824	0.0066	0.0687	100.063
Ol	735B_76R3_96	45 / 1 .	397.581	rim	Ol-gabbro	38.8341	0.0298	0	0.0488			0.3153	38.5415	22.4219	0.0056	0.0672	100.264
Ol	735B_76R3_96	52 / 1 .	397.583	rim	Ol-gabbro	38.4948	0	0.0064	0.0744			0.3541	38.4293	23.1054	0.0128	0.0546	100.532
Ol	735B_76R3_96	54 / 1 .	397.583	rim	Ol-gabbro	38.6155	0.0043	0	0.0432			0.365	38.0556	23.0034	0.0296	0.1238	100.24
Ol	735B_76R3_96	74 / 1 .	397.585	rim	Ol-gabbro	38.5437	0.022	0	0.0406			0.3692	37.6758	23.5795	0.0207	0.0877	100.339
Ol	735B_76R3_96	76 / 1 .	397.585	rim	Ol-gabbro	38.4256	0.0211	0.0115	0.0642			0.3647	37.0378	24.349	0.0008	0.0899	100.365
Ol	735B_76R3_96	84 / 1 .	397.576	rim	Ol-gabbro	38.3087	0.0203	0.0049	0.056			0.3008	37.8671	22.9927	0.0141	0.0962	99.6608
Ol	735B_76R3_96	95 / 1 .	397.577	rim	Ol-gabbro	38.8104	0.0009	0.0247	0.049			0.4128	38.3353	23.2677	0.0075	0.0657	100.974
Ol	735B_76R3_96	97 / 1 .	397.577	rim	Ol-gabbro	38.4129	0	0	0.0363			0.3914	37.9018	23.0929	0	0.0801	99.9154
Ol	735B_76R3_96	106 / 1 .	397.575	rim	Ol-gabbro	38.4789	0	0	0.021			0.3092	37.5186	23.4271	0.024	0.0878	99.8666
Ol	735B_79R4_20	8 / 1 .	419.159	rim	Ol-gabbro	39.7182	0.0044	0	0.0338			0.296	41.7473	18.0742	0.0245	0.164	100.062
Ol	735B_79R4_20	10 / 1 .	419.159	rim	Ol-gabbro	39.4309	0.0071	0	0.0253			0.2921	41.5499	18.4666	0	0.1607	99.9326
Ol	735B_79R4_20	19 / 1 .	419.159	rim	Ol-gabbro	39.5237	0	0.0033	0.0141			0.2895	41.0109	18.7951	0.0447	0.1612	99.8425
Ol	735B_79R4_20	20 / 1 .	419.159	rim	Ol-gabbro	39.8744	0.015	0	0.0522			0.2235	41.9854	18.2286	0.0186	0.1274	100.525
Ol	735B_79R4_20	34 / 1 .	419.163	rim	Ol-gabbro	39.3116	0.0009	0	0.0338			0.3494	40.3645	19.6414	0.0336	0.1541	99.8893
Ol	735B_79R4_20	36 / 1 .	419.163	rim	Ol-gabbro	39.4202	0.008	0.0481	0			0.3028	41.2409	19.4467	0	0.1211	100.588
Ol	735B_79R4_20	62 / 1 .	419.172	rim	Ol-gabbro	39.1706	0.011	0	0.0447			0.3079	40.8928	18.938	0.0097	0.1269	99.5016
Ol	735B_79R4_20	65 / 1 .	419.172	rim	Ol-gabbro	39.6261	0.0179	0.0321	0.0177			0.242	41.6942	18.2948	0	0.1295	100.054
Ol	735B_79R4_20	87 / 1 .	419.179	rim	Ol-gabbro	39.9138	0.0169	0	0.0432			0.2698	42.2193	17.739	0.0146	0.1225	100.339
Ol	735B_79R4_20	89 / 1 .	419.179	rim	Ol-gabbro	39.7391	0.0248	0.0266	0.0071			0.1592	42.4427	18.3059	0	0.1329	100.838
Ol	735B_83R7_43B	5 / 1 .	461.682	rim	Ol-gabbro	39.4875	0.0384	0	0.0314			0.226	41.8792	17.9997	0	0.1521	99.8143
Ol	735B_83R7_43B	6 / 1 .	461.682	rim	Ol-gabbro	39.7055	0.0371	0.0111	0.0431			0.2389	42.2352	18.4762	0.0371	0.1552	100.939
Ol	735B_83R7_43B	28 / 1 .	461.701	rim	Ol-gabbro	39.7211	0.0099	0.0742	0			0.2165	42.0593	18.2998	0	0.1433	100.524
Ol	735B_83R7_43B	30 / 1 .	461.701	rim	Ol-gabbro	39.7272	0.0115	0.01	0.0353			0.2484	41.7624	18.6245	0.0042	0.1911	100.615
Ol	735B_83R7_43B	31 / 1 .	461.701	rim	Ol-gabbro	39.6033	0	0.0249	0.0621			0.2618	42.0096	18.1332	0.0118	0.1796	100.286
Ol	735B_83R7_43B	33 / 1 .	461.701	rim	Ol-gabbro	39.8394	0.0118	0.0589	0.0568			0.278	42.2001	17.6612	0.0146	0.1521	100.273
Ol	735B_83R7_43B	43 / 1 .	461.7	rim	Ol-gabbro	39.4731	0.0093	0.0191	0.0229			0.2572	41.3743	18.9813	0.0484	0.1621	100.348
Ol	735B_83R7_43B	53 / 1 .	461.702	rim	Ol-gabbro	39.5279	0	0.0034	0.0215			0.2813	41.774	18.4152	0.0163	0.1408	100.18
Ol	735B_83R7_43B	55 / 1 .	461.702	rim	Ol-gabbro	39.8179	0.0018	0	0.038			0.287	41.5136	18.6767	0.0067	0.1607	100.502
Ol	735B_83R7_43B	61 / 1 .	461.692	rim	Ol-gabbro	39.7413	0.0236	0.0634	0.004			0.2747	41.4939	18.1948	0	0.1902	99.9859
Ol	735B_83R7_43B	63 / 1 .	461.692	rim	Ol-gabbro	39.3827	0	0	0.0113			0.2975	41.5636	18.2984	0.0051	0.1542	99.7128
Ol	735B_83R7_43B	75 / 1 .	461.688	rim	Ol-gabbro	40.0111	0	0	0.0014			0.2402	42.3245	17.6911	0.0313	0.1368	100.436
Ol	735B_83R7_43B	91 / 1 .	461.69	rim	Ol-gabbro	39.4316	0.0071	0	0.0155			0.2799	41.2948	18.9175	0	0.1525	100.099
Ol	735B_83R7_43B	93 / 1 .	461.69	rim	Ol-gabbro	39.3318	0.0076	0	0.0376			0.3393	41.0191	18.8087	0.0064	0.1205	99.671
Ol	735B_83R7_43B	102 / 1 .	461.689	rim	Ol-gabbro	39.63	0.0236	0	0.0755			0.2814	41.5637	18.1919	0.0065	0.1187	99.8913
Ol	735B_83R7_43B	103 / 1 .	461.689	rim	Ol-gabbro	39.5069	0	0	0.0212			0.3339	41.5289	19.329	0	0.1588	100.879
Ol	735B_83R7_43B	104 / 1 .	461.689	rim	Ol-gabbro	39.7307	0	0.0349	0.082			0.2617	41.6003	18.4805	0	0.1712	100.361
Ol	735B_80R2_51	2 / 1 .	425.987	rim	Ol-gabbro	39.6304	0.0034	0.0429	0.0391			0.3073	42.0228	17.4444	0.0016	0.1437	99.6356
Ol	735B_80R2_51	4 / 1 .	425.987	rim	Ol-gabbro	39.6258	0.0106	0.0449	0.0226			0.2807	41.7446	17.4124	0	0.1297	99.2713
Ol	735B_80R2_51	6 / 1 .	425.987	rim	Ol-gabbro	39.6159	0.0042	0	0.0366			0.2759	42.492	17.7618	0.0081	0.1385	100.333
Ol	735B_80R2_51	16 / 1 .	425.992	rim	Ol-gabbro	39.5015	0.0088	0.0033	0.0141			0.2948	42.0726	18.3727	0	0.1319	100.4
Ol	735B_80R2_51	18 / 1 .	425.992	rim	Ol-gabbro	39.7881	0.007	0.0348	0.045			0.3049	41.7146	18.2704	0	0.1263	100.291
Ol	735B_80R2_51	38 / 1 .	425.999	rim	Ol-gabbro	39.3985	0	0.0032	0.0596			0.2862	41.5069	18.2423	0.0194	0.1583	99.6744
Ol	735B_80R2_51	41 / 1 .	425.999	rim	Ol-gabbro	39.5978	0.0127	0	0.0622			0.2811	41.6551	18.6014	0	0.1059	100.316
Ol	735B_80R2_51	57 / 1 .	425.994	rim	Ol-gabbro	39.2396	0.0009	0	0.0687			0.3405	40.8543	18.4178	0	0.1393	99.0611
Ol	735B_80R2_51	60 / 1 .	425.994	rim	Ol-gabbro	39.5673	0.0009	0	0.0586			0.3727	40.6076	19.3668	0	0.1549	100.129
Ol	735B_80R2_51	76 / 1 .	425.996	rim	Ol-gabbro	39.514	0.0349	0	0.0443			0.244	40.9109	19.0303	0	0.1252	99.9036
Ol	735B_80R2_51	83 / 1 .	426.002	rim	Ol-gabbro	39.6298	0	0.0283	0.0409			0.262	41.7111	18.1915	0	0.1358	99.9994
Ol	735B_80R2_51	84 / 1 .	426.002	rim	Ol-gabbro	39.4154	0.015	0.0416	0.0311			0.274	41.3495	18.4177	0.0313	0.1091	99.6847
Ol	735B_90R2_18	4	509.49	rim	Ol-gabbro	38.921	0	0.0093	0.0342			0.2716	41.8926	18.2194	0.0092	0.1604	99.5177
Ol	735B_90R2_18	6	509.49	rim	Ol-gabbro	38.6742	0.015	0.0085	0.0371			0.3155	42.311	17.84	0	0.1329	99.3342
Ol	735B_90R2_18	16	509.49	rim	Ol-gabbro	39.2806	0.0034	0	0.0433			0.2756	42.5835	17.4971	0.0208	0.1594	99.8637
Ol	735B_90R2_18	20	509.49	rim	Ol-gabbro	39.1394	0	0.0269	0.0373			0.2911	42.3097	17.9267	0	0.1616	99.8927
Ol	735B_90R2_18	27	509.49	rim	Ol-gabbro	38.9532	0.0227	0.0142	0.0396			0.3279	42.0886	18.0653	0.0026	0.1449	99.659
Ol	735B_90R2_18	29	509.49	rim	Ol-gabbro	39.0687	0	0	0.034			0.2638	42.3184	17.907	0.0026	0.1227	99.7172
Ol	735B_90R2_18	37	509.49	rim	Ol-gabbro	38.9318	0.0237	0.0091	0.0419			0.3091	41.3993	19.0239	0.012	0.1431	99.8939
Ol	735B_90R2_18	43	509.49	rim	Ol-gabbro	38.7156	0.0155	0.004	0.0398			0.3069	41.5879	18.2792	0.0026	0.0999	99.0514
Ol	735B_90R2_18	46	509.49	rim	Ol-gabbro	39.2848	0	0	0.0368			0.3044	41.9529	18.5726	0	0.1797	100.331
Ol	735B_90R2_18	56	509.49	rim	Ol-gabbro	39.0849	0.0067	0.0359	0.0455			0.2794	41.8596	17.643	0.0142	0.1539	99.1231
Ol	735B_90R2_18	60	509.49	rim	Ol-gabbro	39.3503	0.0078	0	0.0369			0.2903	42.3545	17.4969	0.0037	0.1794	99.7198
Ol	735B_90R2_18	66	509.49	rim	Ol-gabbro	39.3906	0.0072	0.0148	0.0342			0.26	42.5955	17.1015	0	0.1331	99.5369
Ol	735B_90R2_82	53	510.1	rim	Ol-gabbro	39.8567	0	0.0176	0.0417			0.2867	44.2437	14.9462	0.0134	0.1519	99.5579
Ol	735B_90R2_82	81	510.1	rim	Ol-gabbro	39.5577	0.0096	0.02	0.0469			0.2828	43.0421	16.6695	0.0058	0.1587	99.7931
Ol	735B_90R2_82	83	510.1	rim	Ol-gabbro	39.3635	0.0204	0.0107	0.0832			0.279	43.03	16.5131	0	0.1297	99.4296
Ol	735B_90R2_82	92	510.1	rim	Ol-gabbro	39.4588	0.0046	0.0159	0.0458			0.2796	43.1805	16.1891	0	0.1573	99.3316
Ol	735B_90R2_82	94	510.1	rim	Ol-gabbro	39.3722	0.0113	0.0091	0.0319			0.2747	43.1717	16.3389	0	0.1664	99.3762
Ol	735B_90R2_82	99	510.1	rim	Ol-gabbro	39.4417	0.0165	0.0017	0.04			0.2678	42.7754	16.6148	0.0016	0.1377	99.2972
Ol	735B_90R2_82	114	510.1	rim	Ol-gabbro	39.4115	0	0.0017	0.0381			0.2639	42.8864	16.218	0.0021	0.1407	98.9624
Ol	735B_90R2_82	116	510.1	rim	Ol-gabbro	39.4335	0.0093	0	0.0392			0.2661	43.2204	16.2758	0.009	0.1682	99.4215
Ol	735B_90R2_82	122	510.1	rim	Ol-gabbro	39.4482	0.0079	0.0025	0.0376			0.2728	42.6767	17.0203	0	0.1279	99.5939
Ol	735B_90R2_82	124	510.1	rim	Ol-gabbro	39.2802	0.0023	0	0.0575			0.3039	42.2955	17.4843	0	0.1715	99.5952
Ol	735B_90R2_84	173	510.17	rim	Ol-gabbro	39.6995	0.0147	0.0069	0.0493			0.2731	43.2387	16.3559	0.0064	0.1148	99.7593
Ol	735B_90R2_84	184	510.17	rim	Ol-gabbro	39.5761	0.0221	0.0094	0.0524			0.2811	42.8126	16.4255	0.0093	0.156	99.3445
Ol	735B_90R2_84	208	510.17	rim	Ol-gabbro	39.4584	0.03	0	0.0372			0.2752	42.2579	17.0525	0	0.1444	99.2556
Ol	735B_90R2_84	214	510.17	rim	Ol-gabbro	38.9857	0.0093	0	0.0583			0.2994	42.681	16.8425	0.0089	0.1424	99.0275
Ol	735B_90R2_94B	3	510.27	rim	Ol-gabbro	39.4592	0.0006	0.0163	0.0372			0.2127	44.8065	14.4521	0.0308	0.1651	99.1805
Ol	735B_90R2_94B	4	510.27	rim	Ol-gabbro	39.668	0.0023	0.0006	0.0518			0.2613	44.1018	15.1112	0	0.1779	99.3749
Ol	735B_90R2_94B	6	510.27	rim	Ol-gabbro	39.5212	0	0	0.0331			0.26	44.0086	14.993	0	0.1505	98.9664
Ol	735B_90R2_94B	28	510.27	rim	Ol-gabbro	39.4805	0	0.0044	0.0533			0.2582	44.1136	15.3774	0.018	0.1635	99.4689
Ol	735B_90R2_94B	41	510.27	rim	Ol-gabbro	39.8135	0.0164	0	0.0397			0.2426	44.6293	14.8802	0.0296	0.1863	99.8376
Ol	735B_90R2_94B	50	510.27	rim	Ol-gabbro	39.5956	0.0193	0.0075	0.0439			0.2512	44.9204	14.7412	0.007	0.1958	99.7819
Ol	735B_90R2_94B	52	510.27	rim	Ol-gabbro	39.4087	0	0.0075	0.0572			0.2478	43.9251	15.2215	0.0371	0.1456	99.0505
Ol	735B_90R2_94B	59	510.27	rim	Ol-gabbro	39.468	0	0.0023	0.0702			0.2354	44.8715	14.737	0.0048	0.1651	99.5543
Ol	735B_90R2_94B	61	510.27	rim	Ol-gabbro	39.5633	0.0016	0	0.0321			0.2653	44.5173	14.699	0.0165	0.1535	99.2486
Ol	735B_90R2_94B	2	510.27	rim	Ol-gabbro	39.0734	0	0.0178	0.0412			0.261	44.617	15.1964	0.0472	0.1805	99.4345
Ol	735B_90R2_94B	81	510.56	rim	Ol-gabbro	39.5891	0.001	0	0.0493			0.2673	43.1947	15.8409	0.0084	0.1491	99.0998
Ol	735B_90R2_123	83	510.56	rim	Ol-gabbro	39.7527	0.016	0.0171	0.0302			0.2772	43.0964	16.0546	0.0127	0.18	99.4369
Ol	735B_90R2_123	88	510.56	rim	Ol-gabbro	39.4246	0.0186	0.0148	0.0536			0.2605	43.2912	16.2449	0.0269	0.1271	99.4622
Ol	735B_90R2_123	89	510.56	rim	Ol-gabbro	39.5087	0.0134	0.0234	0.0368			0.2631	43.5809	16.0193	0	0.1704	99.616
Ol	735B_90R2_123	91	510.56	rim	Ol-gabbro	39.6999	0	0	0.0402			0.2618	43.0488	16.1821	0.0005	0.1801	99.4134
Ol	735B_90R2_123	96	510.56	rim	Ol-gabbro	39.4134	0.0046	0.0188	0.0316			0.2803	43.3833	15.8723	0	0.1821	99.1864
Ol	735B_90R2_123	99	510.56	rim	Ol-gabbro	39.6611	0.0005	0.0034	0.0633			0.2845	43.7391	15.8341	0.0195	0.1597	99.7652
Ol	735B_90R2_123	104	510.56	rim	Ol-gabbro	39.4194	0.0078	0.036	0.0358			0.2258	43.7057	15.5856	0.0127	0.1394	99.1682
Ol	735B_90R2_123	115	510.56	rim	Ol-gabbro	39.4008	0.0114	0.0171	0.0517			0.3097	42.7397	16.9347	0.0285	0.1606	99.6542
Ol	735B_90R2_123	122	510.56	rim	Ol-gabbro	39.2528	0.0232	0.0262	0.0513			0.2502	43.2015	16.1507	0.0079	0.1793	99.1431
Ol	735B_90R2_123	132	510.56	rim	Ol-gabbro	39.3422	0.0249	0	0.0328			0.2419	43.4044	15.5507	0.0016	0.1545	98.753
Ol	735B_90R2_135	137	510.67	rim	Ol-gabbro	39.4611	0	0	0.0248			0.246	44.0813	15.8082	0	0.1633	99.7847
Ol	735B_90R2_135	169	510.67	rim	Ol-gabbro	38.9545	0.0207	0.0108	0.0952			0.2839	42.7057	17.0598	0	0.15	99.2806
Ol	735B_90R2_135	224	510.67	rim	Ol-gabbro	39.249	0.0021	0	0.0285			0.2563	43.2279	16.5494	0	0.1193	99.4325
Ol	735B_90R2_135	230	510.67	rim	Ol-gabbro	39.4242	0.0077	0.0182	0.0341			0.2287	43.9967	16.0981	0.0147	0.1853	100.008
Ol	735B_90R3_6	11	510.84	rim	Ol-gabbro	39.652	0.0173	0.0104	0.0318			0.254	44.8756	15.2991	0	0.1269	100.267
Ol	735B_90R3_6	12	510.84	rim	Ol-gabbro	39.6637	0.0063	0.0058	0.0298			0.2492	44.7928	15.1223	0	0.1515	100.021
Ol	735B_90R3_6	22	510.84	rim	Ol-gabbro	39.4063	0.0047	0.0063	0.0622			0.2089	43.3831	16.1753	0.0042	0.1412	99.3922
Ol	735B_90R3_6	26	510.84	rim	Ol-gabbro	39.4112	0	0.0114	0.0339			0.2829	43.3945	16.0643	0.0142	0.1489	99.3613
Ol	735B_90R3_6	30	510.84	rim	Ol-gabbro	39.9186	0.0237	0.0486	0.0356			0.2347	43.8305	15.7688	0.0196	0.1582	100.038
Ol	735B_90R3_6	38	510.84	rim	Ol-gabbro	39.49	0.0186	0	0.0295			0.2518	43.786	15.6605	0	0.161	99.3974
Ol	735B_90R3_6	46	510.84	rim	Ol-gabbro	39.6192	0.0222	0	0.0433			0.2576	44.4358	15.1165	0.0079	0.1308	99.6333
Ol	735B_90R3_6	60	510.84	rim	Ol-gabbro	39.4724	0	0.0029	0.051			0.2922	44.3132	14.8554	0.0149	0.1581	99.1601
Ol	735B_90R3_6	75	510.84	rim	Ol-gabbro	39.4457	0.0057	0.043	0.0311			0.2468	44.1892	15.3173	0.0212	0.1591	99.4591
Ol	735B_83R7_130A	89 / 1 .	462.554	core	Ol-rich gabbro	40.0495	0.0158	0	0.0349			0.2691	43.7481	15.2967	0.0571	0.1596	99.6308
Ol	735B_83R7_130A	92 / 1 .	462.554	core	Ol-rich gabbro	39.9191	0.0035	0.005	0.021			0.2743	43.6095	15.3719	0.0059	0.2375	99.4477
Ol	735B_83R7_130A	93 / 1 .	462.554	core	Ol-rich gabbro	40.1902	0	0.0149	0.0655			0.2842	43.2636	15.3462	0.0235	0.1849	99.373
Ol	735B_83R7_130A	102 / 1 .	462.569	core	Ol-rich gabbro	40.3788	0	0.0215	0.0473			0.2416	43.6042	15.3252	0	0.2088	99.8274
Ol	735B_83R7_130A	103 / 1 .	462.569	core	Ol-rich gabbro	40.0403	0	0	0.0405			0.2073	44.184	15.2021	0.0345	0.2502	99.9589
Ol	735B_83R7_130A	110 / 1 .	462.568	core	Ol-rich gabbro	39.9124	0	0.0249	0.0797			0.2299	43.8331	15.3679	0	0.1659	99.6138
Ol	735B_83R7_130A	111 / 1 .	462.568	core	Ol-rich gabbro	39.9295	0.0114	0.0247	0.0764			0.2488	43.7647	15.4077	0	0.1395	99.6027
Ol	735B_83R7_130A	130 / 1 .	462.56	core	Ol-rich gabbro	40.0753	0.0229	0	0.0824			0.2534	43.9303	14.9252	0	0.1311	99.4206
Ol	735B_83R7_130A	132 / 1 .	462.56	core	Ol-rich gabbro	40.239	0	0.0414	0.0405			0.2582	43.7544	15.4081	0	0.2335	99.9751
Ol	735B_83R7_130A	134 / 1 .	462.56	core	Ol-rich gabbro	40.1632	0.0298	0	0.0584			0.2642	43.7398	15.4328	0	0.1682	99.8564
Ol	735B_83R7_130A	136 / 1 .	462.56	core	Ol-rich gabbro	40.0817	0.0053	0	0.0419			0.2594	43.6009	15.2284	0.0118	0.1554	99.3848
Ol	735B_83R7_130A	139 / 1 .	462.56	core	Ol-rich gabbro	40.4122	0	0.0083	0.021			0.2289	44.0721	15.1916	0.0008	0.202	100.137
Ol	735B_83R7_130A	150 / 1 .	462.553	core	Ol-rich gabbro	40.1113	0.0079	0	0.0797			0.2772	43.7757	14.9825	0.0202	0.2127	99.4672
Ol	735B_83R7_130A	153 / 1 .	462.553	core	Ol-rich gabbro	40.0373	0.0071	0	0.0392			0.2647	43.9458	14.8425	0	0.2128	99.3494
Ol	735B_83R7_130A	154 / 1 .	462.553	core	Ol-rich gabbro	40.0086	0.008	0	0.0672			0.2674	43.5581	15.5785	0.0084	0.1694	99.6656
Ol	735B_83R7_130A	156 / 1 .	462.553	core	Ol-rich gabbro	40.0916	0.0071	0.0398	0.0154			0.214	43.9814	15.0851	0	0.1977	99.6321
Ol	735B_83R7_130A	162 / 1 .	462.566	core	Ol-rich gabbro	39.9506	0.0353	0	0.0588			0.1973	43.7768	15.1885	0.0177	0.1359	99.3609
Ol	735B_83R7_130A	164 / 1 .	462.566	core	Ol-rich gabbro	40.3493	0	0.0597	0.0713			0.2304	43.9729	15.4867	0	0.1661	100.336
Ol	735B_83R7_0	1 / 1 .	461.554	core	Ol-rich gabbro	39.6586	0	0.0426	0.0125			0.2474	42.4584	17.5904	0.005	0.1587	100.174
Ol	735B_83R7_0	3 / 1 .	461.554	core	Ol-rich gabbro	39.4958	0.0062	0	0.0599			0.2525	42.4789	17.0565	0.0067	0.1596	99.5161
Ol	735B_83R7_0	5 / 1 .	461.554	core	Ol-rich gabbro	39.136	0.0326	0.0445	0.0181			0.2943	42.1759	17.2496	0.0142	0.0963	99.0615
Ol	735B_83R7_0	17 / 1 .	461.568	core	Ol-rich gabbro	39.6282	0.0123	0.0262	0.0194			0.2465	41.9844	17.3566	0.0058	0.1182	99.3976
Ol	735B_83R7_0	19 / 1 .	461.568	core	Ol-rich gabbro	39.5334	0.0087	0.0098	0.0235			0.2711	42.1593	17.2712	0	0.0762	99.3532
Ol	735B_83R7_0	31 / 1 .	461.569	core	Ol-rich gabbro	39.4364	0	0	0.0319			0.2547	41.5327	18.2332	0.0224	0.1363	99.6476
Ol	735B_83R7_0	32 / 1 .	461.569	core	Ol-rich gabbro	39.1932	0.0044	0	0.0432			0.2994	42.2277	17.4365	0.0626	0.1326	99.3996
Ol	735B_83R7_0	34 / 1 .	461.569	core	Ol-rich gabbro	39.4705	0.0236	0	0.0318			0.2531	41.8697	17.6254	0.0174	0.1061	99.3976
Ol	735B_83R7_0	35 / 1 .	461.569	core	Ol-rich gabbro	39.6199	0	0.0017	0.0377			0.2686	42.2733	17.3458	0	0.1944	99.7414
Ol	735B_83R7_0	36 / 1 .	461.563	core	Ol-rich gabbro	39.2236	0	0.0016	0.0486			0.2376	42.5609	17.289	0.0383	0.141	99.5406
Ol	735B_83R7_0	39 / 1 .	461.563	core	Ol-rich gabbro	39.1458	0.0239	0.0248	0.0627			0.2248	42.4572	17.7616	0.0175	0.1853	99.9036
Ol	735B_83R7_0	41 / 1 .	461.563	core	Ol-rich gabbro	39.4839	0.0088	0	0.0028			0.2755	42.9452	16.8851	0	0.1581	99.7594
Ol	735B_83R7_0	54 / 1 .	461.565	core	Ol-rich gabbro	39.4825	0.0035	0	0.0402			0.2809	42.4782	17.7847	0	0.1469	100.217
Ol	735B_83R7_0	56 / 1 .	461.565	core	Ol-rich gabbro	39.4275	0.021	0.0098	0.0235			0.203	42.0334	17.2198	0.005	0.1152	99.0582
Ol	735B_83R7_0	57 / 1 .	461.563	core	Ol-rich gabbro	39.2902	0	0	0.0541			0.2423	42.4823	16.9996	0.0017	0.1632	99.2334
Ol	735B_83R7_0	70 / 1 .	461.574	core	Ol-rich gabbro	39.8792	0.0096	0	0.079			0.3183	42.6995	17.3114	0	0.1811	100.478
Ol	735B_83R7_0	73 / 1 .	461.574	core	Ol-rich gabbro	39.6926	0.0114	0.059	0.0623			0.2902	42.2255	17.4544	0.0149	0.1361	99.9464
Ol	735B_83R7_113A	3 / 1 .	462.4	core	Ol-rich gabbro	39.7111	0	0.0167	0.0369			0.2026	44.278	15.7028	0	0.2041	100.152
Ol	735B_83R7_113A	4 / 1 .	462.4	core	Ol-rich gabbro	39.7323	0	0.0527	0.0533			0.2221	43.9677	15.5425	0	0.2151	99.7857
Ol	735B_83R7_113A	6 / 1 .	462.4	core	Ol-rich gabbro	39.6009	0.0044	0.0151	0.0425			0.2103	44.1757	15.7273	0	0.2103	99.9865
Ol	735B_83R7_113A	20 / 1 .	462.389	core	Ol-rich gabbro	39.654	0	0.015	0.0438			0.2733	43.6984	15.9551	0.0119	0.1758	99.8273
Ol	735B_83R7_113A	24 / 1 .	462.39	core	Ol-rich gabbro	39.6976	0.0097	0.0201	0.0284			0.2661	43.6403	15.444	0.0034	0.2272	99.3368
Ol	735B_83R7_113A	25 / 1 .	462.39	core	Ol-rich gabbro	39.5739	0.0134	0	0.0645			0.2431	43.9374	15.4114	0.0069	0.1876	99.4382
Ol	735B_83R7_113A	30 / 1 .	462.383	core	Ol-rich gabbro	39.9467	0.0042	0.016	0.0528			0.2809	43.1151	16.072	0.013	0.1992	99.6999
Ol	735B_83R7_113A	32 / 1 .	462.383	core	Ol-rich gabbro	39.4715	0.008	0.0284	0.0411			0.2396	43.4351	15.8559	0.0102	0.2008	99.2906
Ol	735B_83R7_113A	44 / 1 .	462.383	core	Ol-rich gabbro	39.6875	0.0107	0	0.0841			0.2368	43.2339	15.8567	0	0.2236	99.3333
Ol	735B_83R7_113A	45 / 1 .	462.394	core	Ol-rich gabbro	39.7024	0.0117	0.0763	0.069			0.2376	43.5878	15.901	0.0138	0.2006	99.8002
Ol	735B_83R7_113A	48 / 1 .	462.394	core	Ol-rich gabbro	39.8567	0	0	0.0411			0.2166	43.7064	15.6342	0	0.1515	99.6065
Ol	735B_83R7_113A	53 / 1 .	462.392	core	Ol-rich gabbro	39.7286	0.0193	0.0266	0.1154			0.2073	43.9403	15.5369	0	0.1926	99.767
Ol	735B_83R7_113A	60 / 1 .	462.399	core	Ol-rich gabbro	39.9477	0.0185	0.03	0.0311			0.2619	43.6536	15.6181	0.0204	0.2241	99.8054
Ol	735B_83R7_113A	61 / 1 .	462.399	core	Ol-rich gabbro	39.8728	0	0	0.0341			0.2005	43.8977	15.2797	0.0231	0.2032	99.5111
Ol	735B_83R7_113A	62 / 1 .	462.392	core	Ol-rich gabbro	39.7621	0	0	0.054			0.2142	43.4103	15.5725	0.0086	0.1313	99.153
Ol	735B_83R7_113A	73 / 1 .	462.395	core	Ol-rich gabbro	39.6788	0.0018	0.0017	0.0532			0.2403	43.2911	15.771	0	0.213	99.2509
Ol	735B_83R7_113A	80 / 1 .	462.394	core	Ol-rich gabbro	39.6003	0	0.0223	0.0769			0.225	43.2916	15.7167	0	0.187	99.1198
Ol	735B_83R7_113A	86 / 1 .	462.393	core	Ol-rich gabbro	39.7828	0.0009	0.0051	0			0.2131	43.5548	15.7763	0	0.1904	99.5234
Ol	735B_83R7_113A	87 / 1 .	462.393	core	Ol-rich gabbro	39.6406	0.011	0	0.0648			0.1994	43.6506	16.0857	0	0.1613	99.8134
Ol	735B_83R7_113A	88 / 1 .	462.393	core	Ol-rich gabbro	39.8651	0	0	0.0418			0.2449	43.1346	15.8836	0	0.2184	99.3884
Ol	735B_91R1_93A	55 / 1 .	518.357	core	Ol-rich gabbro	40.1128	0	0.005	0.0849			0.2564	43.2078	16.0085	0.0026	0.1569	99.8349
Ol	735B_91R1_93A	56 / 1 .	518.357	core	Ol-rich gabbro	39.982	0	0	0.0567			0.2939	43.2883	16.0128	0.052	0.1401	99.8258
Ol	735B_91R1_93A	57 / 1 .	518.357	core	Ol-rich gabbro	40.1768	0.0061	0.0498	0.0338			0.2578	43.7753	15.9605	0.0542	0.1987	100.513
Ol	735B_91R1_93A	58 / 1 .	518.357	core	Ol-rich gabbro	39.9378	0	0	0.0499			0.268	43.5249	15.8201	0	0.1354	99.7361
Ol	735B_91R1_93A	65 / 1 .	518.357	core	Ol-rich gabbro	39.874	0.0124	0.0284	0.0481			0.2599	43.6619	15.9331	0.017	0.238	100.073
Ol	735B_91R1_93A	67 / 1 .	518.357	core	Ol-rich gabbro	40.1253	0.0133	0.0653	0.0199			0.242	43.084	16.3717	0.0213	0.2104	100.153
Ol	735B_91R1_93A	68 / 1 .	518.357	core	Ol-rich gabbro	40.2793	0.0213	0.0101	0.0285			0.2561	43.3429	15.7388	0	0.1732	99.8502
Ol	735B_91R1_93A	69 / 1 .	518.357	core	Ol-rich gabbro	40.1375	0.0168	0.0685	0.0524			0.2687	43.5023	16.1838	0.0017	0.19	100.422
Ol	735B_91R1_93A	74 / 1 .	518.357	core	Ol-rich gabbro	40.1041	0	0	0.0539			0.3082	43.4156	15.6108	0.0222	0.1948	99.7096
Ol	735B_91R1_93A	76 / 1 .	518.357	core	Ol-rich gabbro	39.9625	0.0009	0.0283	0.0508			0.253	43.2135	15.9869	0	0.2009	99.6968
Ol	735B_91R1_93A	78 / 1 .	518.357	core	Ol-rich gabbro	40.1921	0.0242	0.0136	0.0403			0.1924	43.8074	15.5318	0	0.2148	100.017
Ol	735B_91R1_93A	2 / 1 .	518.35	core	Ol-rich gabbro	39.8148	0	0	0.0407			0.2234	44.0985	15.5314	0	0.1914	99.9002
Ol	735B_91R1_93A	4 / 1 .	518.35	core	Ol-rich gabbro	39.5948	0.0212	0.0067	0.0523			0.2677	43.4714	15.8315	0	0.1897	99.4353
Ol	735B_91R1_93A	6 / 1 .	518.35	core	Ol-rich gabbro	39.8908	0.0186	0.0117	0.0128			0.2027	43.3223	15.5986	0	0.1574	99.2149
Ol	735B_91R1_93A	7 / 1 .	518.35	core	Ol-rich gabbro	39.8844	0.0124	0.0284	0.0325			0.2253	43.3868	15.702	0	0.1721	99.4439
Ol	735B_91R1_93A	8 / 1 .	518.35	core	Ol-rich gabbro	39.8138	0.0204	0.0419	0.0227			0.2893	43.4642	15.9203	0	0.1659	99.7385
Ol	735B_91R1_93A	22 / 1 .	518.345	core	Ol-rich gabbro	39.5933	0.0486	0.0534	0.0467			0.3067	42.3814	16.1879	0.0179	0.1953	98.8312
Ol	735B_91R1_93A	24 / 1 .	518.345	core	Ol-rich gabbro	39.6402	0.0274	0	0.0283			0.274	42.7972	16.4041	0.0128	0.1877	99.3717
Ol	735B_91R1_93A	25 / 1 .	518.345	core	Ol-rich gabbro	40.0531	0.0124	0.0518	0.0765			0.2349	43.1358	16.2995	0	0.1971	100.061
Ol	735B_91R1_93A	27 / 1 .	518.345	core	Ol-rich gabbro	39.5842	0.0432	0.04	0.0339			0.2783	42.5327	16.2255	0	0.1474	98.8852
Ol	735B_91R1_93A	28 / 1 .	518.345	core	Ol-rich gabbro	39.8794	0.0319	0.0418	0.0298			0.2134	43.4196	15.9863	0.0487	0.1857	99.8366
Ol	735B_91R1_93A	40 / 1 .	518.343	core	Ol-rich gabbro	40.0029	0	0	0.0368			0.2556	43.3025	16.0689	0	0.1862	99.8529
Ol	735B_91R1_93A	41 / 1 .	518.343	core	Ol-rich gabbro	39.6733	0.0085	0.0591	0.046			0.2151	43.5033	16.2069	0.0228	0.206	99.941
Ol	735B_91R1_93A	42 / 1 .	518.343	core	Ol-rich gabbro	39.8774	0.0123	0.045	0.0438			0.2226	43.1461	15.8657	0.0229	0.1588	99.3946
Ol	735B_91R1_93A	43 / 1 .	518.343	core	Ol-rich gabbro	39.8453	0.0018	0	0.0551			0.1951	42.7765	16.1961	0	0.1219	99.1918
Ol	735B_91R1_93A	51 / 1 .	518.351	core	Ol-rich gabbro	39.8657	0	0	0.0041			0.2427	43.1173	15.754	0.0484	0.1593	99.1915
Ol	735B_91R1_93A	52 / 1 .	518.351	core	Ol-rich gabbro	39.8625	0.0229	0.045	0.0311			0.2169	43.3491	15.9596	0.0297	0.188	99.7048
Ol	735B_91R1_93A	54 / 1 .	518.351	core	Ol-rich gabbro	39.9391	0.0307	0.0515	0.0259			0.2103	43.3205	16.1843	0.0049	0.161	99.9282
Ol	735B_91R1_93A	65 / 1 .	518.336	core	Ol-rich gabbro	39.4119	0.0177	0.0449	0.0409			0.2981	42.7586	16.8875	0	0.1657	99.6253
Ol	735B_91R1_93A	66 / 1 .	518.336	core	Ol-rich gabbro	39.8244	0.0168	0.0566	0.0268			0.2889	42.821	16.9834	0.0254	0.1933	100.237
Ol	735B_91R1_93A	67 / 1 .	518.336	core	Ol-rich gabbro	39.4762	0.0079	0.0399	0			0.2898	42.6105	16.6828	0	0.1619	99.269
Ol	735B_91R1_93A	68 / 1 .	518.336	core	Ol-rich gabbro	39.7658	0.0053	0.0569	0.0411			0.2655	42.9223	16.1783	0.0119	0.1664	99.4135
Ol	735B_91R1_93A	69 / 1 .	518.334	core	Ol-rich gabbro	39.6065	0.0186	0.0434	0.0396			0.2133	43.2586	16.2439	0	0.1736	99.5975
Ol	735B_91R1_93A	71 / 1 .	518.334	core	Ol-rich gabbro	39.6937	0.0298	0.0392	0.026			0.2978	43.6561	16.0435	0.007	0.1805	99.9736
Ol	735B_91R1_93A	87 / 1 .	518.334	core	Ol-rich gabbro	39.6798	0.0238	0.0183	0.0325			0.2692	42.9822	16.259	0.0289	0.1973	99.491
Ol	735B_91R1_93A	88 / 1 .	518.334	core	Ol-rich gabbro	39.3779	0	0	0.0127			0.2403	43.2262	16.4338	0	0.2182	99.5091
Ol	735B_91R1_93A	89 / 1 .	518.334	core	Ol-rich gabbro	39.489	0	0	0.0282			0.2578	42.4051	16.957	0.0102	0.1535	99.3008
Ol	735B_91R1_93A	1 / 1 .	518.164	core	Ol-rich gabbro	39.6202	0.0186	0.015	0.0552			0.2389	43.7306	16.1905	0	0.199	100.068
Ol	735B_91R1_93A	2 / 1 .	518.164	core	Ol-rich gabbro	39.6148	0.0027	0.0184	0.0297			0.2589	43.8565	15.3726	0.0145	0.1577	99.3258
Ol	735B_91R1_93A	4 / 1 .	518.164	core	Ol-rich gabbro	39.6931	0.0115	0	0.0227			0.2478	43.5172	15.5879	0.0009	0.2217	99.3028
Ol	735B_91R1_93A	18 / 1 .	518.164	core	Ol-rich gabbro	39.5714	0	0.0509	0.0589			0.2525	42.7917	16.6761	0.0017	0.1531	99.5563
Ol	735B_91R1_93A	19 / 1 .	518.164	core	Ol-rich gabbro	39.5888	0.0042	0.0096	0.0446			0.2784	42.8018	16.0737	0.0187	0.1852	99.005
Ol	735B_91R1_93A	20 / 1 .	518.164	core	Ol-rich gabbro	39.5442	0.0018	0.0493	0.0533			0.2796	43.196	16.0575	0.0009	0.1572	99.3398
Ol	735B_91R1_93A	27 / 1 .	518.162	core	Ol-rich gabbro	39.7975	0.0265	0	0.0325			0.2456	43.6732	16.2941	0.0349	0.1737	100.278
Ol	735B_91R1_93A	28 / 1 .	518.162	core	Ol-rich gabbro	39.4701	0.0151	0.0167	0.0355			0.265	42.8174	16.047	0.0111	0.1757	98.8536
Ol	735B_91R1_93A	30 / 1 .	518.162	core	Ol-rich gabbro	39.4882	0	0.0335	0.0213			0.231	43.2502	16.1878	0.0324	0.1688	99.4132
Ol	735B_91R1_93A	31 / 1 .	518.154	core	Ol-rich gabbro	39.6747	0.0151	0.0601	0.0623			0.2562	43.7052	15.9894	0	0.1523	99.9153
Ol	735B_91R1_93A	33 / 1 .	518.154	core	Ol-rich gabbro	40.0467	0.0026	0	0.0311			0.2268	43.1235	16.6424	0.0348	0.1413	100.249
Ol	735B_91R1_93A	46 / 1 .	518.152	core	Ol-rich gabbro	39.6848	0.0133	0.0536	0.0284			0.1997	43.1464	16.3124	0.0111	0.1657	99.6154
Ol	735B_91R1_93A	47 / 1 .	518.152	core	Ol-rich gabbro	39.6259	0	0.0117	0.0537			0.2578	42.8008	16.6404	0.0136	0.1965	99.6004
Ol	735B_91R1_93A	48 / 1 .	518.152	core	Ol-rich gabbro	39.5233	0.1217	0	0.0367			0.2559	42.9999	16.1409	0.1145	0.1725	99.3654
Ol	735B_91R1_93A	54 / 1 .	518.145	core	Ol-rich gabbro	39.4063	0.008	0.0533	0.0777			0.2587	42.6761	16.8979	0	0.1275	99.5055
Ol	735B_91R1_93A	55 / 1 .	518.145	core	Ol-rich gabbro	39.1551	0	0.0316	0.0198			0.3209	42.2913	17.3503	0.0288	0.2181	99.4159
Ol	735B_91R1_93A	63 / 1 .	518.153	core	Ol-rich gabbro	39.769	0	0.0225	0.041			0.2496	43.1316	16.6276	0	0.204	100.045
Ol	735B_91R1_93A	65 / 1 .	518.153	core	Ol-rich gabbro	39.4109	0.008	0.0467	0.0368			0.2825	42.9193	16.6741	0.0221	0.1861	99.5865
Ol	735B_91R1_93A	66 / 1 .	518.153	core	Ol-rich gabbro	39.5772	0.0106	0.0267	0.0438			0.2591	43.2926	16.3316	0.0077	0.1613	99.7106
Ol	735B_91R1_93A	75 / 1 .	518.15	core	Ol-rich gabbro	39.6765	0.0204	0.1189	0.0531			0.2669	42.7773	16.3421	0.0106	0.1421	99.4079
Ol	735B_91R1_93A	76 / 1 .	518.15	core	Ol-rich gabbro	39.5847	0.0469	0	0.0423			0.1979	43.7584	16.2563	0	0.1525	100.039
Ol	735B_91R1_93A	90 / 1 .	462.554	rim	Ol-rich gabbro	40.2804	0	0	0.0181			0.1746	44.3381	14.9168	0.0327	0.1984	99.9591
Ol	735B_91R1_93A	91 / 1 .	462.554	rim	Ol-rich gabbro	39.9903	0	0	0.0643			0.2554	43.8621	15.4293	0	0.1735	99.7749
Ol	735B_91R1_93A	94 / 1 .	462.554	rim	Ol-rich gabbro	40.1655	0	0.0214	0.0543			0.2691	43.9346	15.2704	0	0.2282	99.9435
Ol	735B_91R1_93A	104 / 1 .	462.569	rim	Ol-rich gabbro	40.084	0.0211	0	0.0417			0.2599	44.1673	15.4168	0	0.1952	100.186
Ol	735B_91R1_93A	105 / 1 .	462.569	rim	Ol-rich gabbro	40.008	0	0.0532	0.0518			0.2375	43.8978	15.3776	0	0.1527	99.7786
Ol	735B_91R1_93A	106 / 1 .	462.569	rim	Ol-rich gabbro	40.1002	0.0315	0.0247	0.0611			0.2095	43.8394	15.1789	0.0167	0.2442	99.7062
Ol	735B_91R1_93A	112 / 1 .	462.568	rim	Ol-rich gabbro	40.2674	0	0	0.0575			0.293	43.5247	15.3177	0.0346	0.1815	99.6764
Ol	735B_91R1_93A	113 / 1 .	462.568	rim	Ol-rich gabbro	39.9192	0.0061	0	0.0389			0.2331	43.5672	15.1395	0.0084	0.1408	99.0532
Ol	735B_91R1_93A	114 / 1 .	462.568	rim	Ol-rich gabbro	40.2243	0	0.0649	0.0449			0.2582	44.6258	14.9721	0	0.2042	100.394
Ol	735B_91R1_93A	131 / 1 .	462.56	rim	Ol-rich gabbro	40.1909	0	0.0181	0.0209			0.2433	42.523	16.6842	0	0.1096	99.79
Ol	735B_91R1_93A	133 / 1 .	462.56	rim	Ol-rich gabbro	39.8396	0.0114	0.0427	0.0236			0.2467	43.4321	16.005	0.0175	0.1811	99.7997
Ol	735B_91R1_93A	135 / 1 .	462.56	rim	Ol-rich gabbro	39.9969	0.0263	0	0.0639			0.2142	43.562	14.8203	0.0276	0.147	98.8582
Ol	735B_91R1_93A	137 / 1 .	462.56	rim	Ol-rich gabbro	40.0786	0	0	0.0404			0.2188	43.9607	14.828	0.0218	0.2555	99.4038
Ol	735B_91R1_93A	138 / 1 .	462.56	rim	Ol-rich gabbro	39.7972	0.0071	0.0182	0.0349			0.2322	43.837	15.5084	0.0025	0.2217	99.6592
Ol	735B_91R1_93A	151 / 1 .	462.553	rim	Ol-rich gabbro	40.021	0.0256	0	0.0461			0.2509	43.4626	16.0228	0.0436	0.2216	100.094
Ol	735B_91R1_93A	152 / 1 .	462.553	rim	Ol-rich gabbro	40.1461	0	0	0.0293			0.1848	43.781	15.2205	0.0143	0.1356	99.5116
Ol	735B_91R1_93A	155 / 1 .	462.553	rim	Ol-rich gabbro	40.0124	0.0455	0.023	0.0291			0.2171	43.8886	14.9642	0.0301	0.1857	99.3957
Ol	735B_91R1_93A	157 / 1 .	462.553	rim	Ol-rich gabbro	40.0664	0	0.0449	0.0407			0.2287	44.3803	14.7577	0	0.2377	99.7564
Ol	735B_91R1_93A	163 / 1 .	462.566	rim	Ol-rich gabbro	40.0522	0.015	0	0.0517			0.3039	43.7509	14.929	0	0.196	99.2987
Ol	735B_91R1_93A	165 / 1 .	462.566	rim	Ol-rich gabbro	40.0561	0.0035	0.058	0.0671			0.1982	44.2125	15.1785	0	0.1643	99.9382
Ol	735B_83R7_0	2 / 1 .	461.554	rim	Ol-rich gabbro	39.3125	0.0361	0.0049	0.0097			0.2914	42.2139	17.121	0.0401	0.1685	99.1981
Ol	735B_83R7_0	18 / 1 .	461.568	rim	Ol-rich gabbro	39.6296	0	0.0347	0.0655			0.2867	42.2793	17.0752	0.0167	0.1611	99.5488
Ol	735B_83R7_0	33 / 1 .	461.569	rim	Ol-rich gabbro	39.307	0.0264	0.0543	0.0306			0.3213	42.1444	17.4587	0.05	0.0947	99.4874
Ol	735B_83R7_0	37 / 1 .	461.563	rim	Ol-rich gabbro	39.5958	0.0185	0.028	0.0292			0.3235	42.188	17.2082	0.0326	0.2287	99.6525
Ol	735B_83R7_0	38 / 1 .	461.563	rim	Ol-rich gabbro	39.5662	0	0	0.0305			0.2646	42.7354	17.8744	0.01	0.1153	100.596
Ol	735B_83R7_0	40 / 1 .	461.563	rim	Ol-rich gabbro	39.5345	0.0123	0.0344	0.0208			0.3341	42.2523	17.5581	0.0133	0.1332	99.893
Ol	735B_83R7_0	55 / 1 .	461.565	rim	Ol-rich gabbro	39.4796	0.0105	0.0361	0.0485			0.2832	42.5603	17.5868	0.0108	0.1379	100.154
Ol	735B_83R7_0	58 / 1 .	461.563	rim	Ol-rich gabbro	39.2497	0	0	0.0348			0.2234	42.5527	16.9122	0.0075	0.1202	99.1005
Ol	735B_83R7_0	71 / 1 .	461.574	rim	Ol-rich gabbro	39.6307	0.0422	0.0049	0.0348			0.2952	42.3101	17.0404	0.0208	0.1427	99.5218
Ol	735B_83R7_0	72 / 1 .	461.574	rim	Ol-rich gabbro	39.4495	0.022	0	0.0444			0.2689	42.7175	17.4146	0	0.1394	100.056
Ol	735B_83R7_113A	1 / 1 .	462.4	rim	Ol-rich gabbro	40.0059	0	0	0.0158			0.2478	43.6576	15.9781	0.0026	0.1629	100.071
Ol	735B_83R7_113A	2 / 1 .	462.4	rim	Ol-rich gabbro	39.8012	0.0295	0	0.0432			0.2513	43.753	15.4464	0.0228	0.157	99.5044
Ol	735B_83R7_113A	5 / 1 .	462.4	rim	Ol-rich gabbro	39.7252	0.0124	0.015	0.0326			0.2673	43.9773	15.9898	0	0.1923	100.212
Ol	735B_83R7_113A	7 / 1 .	462.4	rim	Ol-rich gabbro	39.522	0	0	0.0551			0.237	43.0589	16.1757	0	0.1674	99.2161
Ol	735B_83R7_113A	17 / 1 .	462.389	rim	Ol-rich gabbro	39.9782	0.0186	0	0.0379			0.2101	44.1833	14.9974	0	0.2093	99.6348
Ol	735B_83R7_113A	18 / 1 .	462.389	rim	Ol-rich gabbro	39.605	0.0045	0.0034	0.0373			0.2501	44.0369	15.4665	0	0.1957	99.5994
Ol	735B_83R7_113A	19 / 1 .	462.389	rim	Ol-rich gabbro	39.805	0	0	0.0461			0.1684	43.9263	15.6767	0	0.1869	99.8094
Ol	735B_83R7_113A	31 / 1 .	462.383	rim	Ol-rich gabbro	39.4204	0	0.0134	0.0142			0.2988	43.6842	16.0896	0.0136	0.1931	99.7273
Ol	735B_83R7_113A	33 / 1 .	462.383	rim	Ol-rich gabbro	39.9105	0.0203	0	0.0495			0.2466	43.3136	15.601	0	0.1806	99.3221
Ol	735B_83R7_113A	34 / 1 .	462.383	rim	Ol-rich gabbro	39.8643	0.0133	0	0.0638			0.2506	43.7011	15.487	0.0111	0.1918	99.583
Ol	735B_83R7_113A	38 / 1 .	462.385	rim	Ol-rich gabbro	39.9058	0	0	0.0403			0.2565	43.137	15.6354	0.0164	0.1687	99.1601
Ol	735B_83R7_113A	40 / 1 .	462.385	rim	Ol-rich gabbro	39.8866	0.0177	0.0435	0.0652			0.2176	43.7955	15.5031	0	0.1823	99.7115
Ol	735B_83R7_113A	46 / 1 .	462.394	rim	Ol-rich gabbro	39.8206	0.0196	0.0252	0.047			0.2701	44.1296	15.5484	0	0.1339	99.9944
Ol	735B_83R7_113A	47 / 1 .	462.394	rim	Ol-rich gabbro	39.7146	0.0107	0	0.0626			0.2571	43.2543	15.6281	0.0043	0.2086	99.1403
Ol	735B_83R7_113A	59 / 1 .	462.399	rim	Ol-rich gabbro	39.8963	0	0	0.0625			0.3145	43.5723	15.7401	0.0402	0.1844	99.8103
Ol	735B_83R7_113A	63 / 1 .	462.392	rim	Ol-rich gabbro	39.5799	0	0	0.0392			0.2211	43.2379	15.602	0.0057	0.183	98.8688
Ol	735B_83R7_113A	74 / 1 .	462.395	rim	Ol-rich gabbro	39.5501	0	0	0.0331			0.3262	42.8739	16.037	0	0.1991	99.0194
Ol	735B_83R7_113A	79 / 1 .	462.394	rim	Ol-rich gabbro	39.5384	0.0085	0	0.0338			0.3078	43.3597	16.1608	0.013	0.1543	99.5763
Ol	735B_83R7_113A	85 / 1 .	462.393	rim	Ol-rich gabbro	40.2358	0.0099	0.0102	0.0474			0.2567	43.576	15.4493	0	0.185	99.7703
Ol	735B_83R7_113A	89 / 1 .	462.393	rim	Ol-rich gabbro	39.4508	0	0.0207	0.0175			0.2246	43.4976	15.991	0.013	0.1936	99.4088
Ol	735B_91R1_93A	59 / 1 .	518.357	rim	Ol-rich gabbro	40.464	0.0118	0.0016	0.0081			0.2884	43.9326	15.9144	0	0.1461	100.767
Ol	735B_91R1_93A	66 / 1 .	518.357	rim	Ol-rich gabbro	40.1125	0.0071	0	0.0384			0.2486	43.6259	15.8868	0.0248	0.1767	100.121
Ol	735B_91R1_93A	75 / 1 .	518.357	rim	Ol-rich gabbro	40.25	0.0053	0	0.0426			0.2661	43.6887	15.8461	0	0.1534	100.252
Ol	735B_91R1_93A	77 / 1 .	518.357	rim	Ol-rich gabbro	40.1363	0	0	0.0698			0.2725	44.0689	15.6386	0.0292	0.2175	100.433
Ol	735B_91R1_93A	1 / 1 .	518.35	rim	Ol-rich gabbro	39.6932	0.0354	0.0552	0.0539			0.2119	43.3619	15.6898	0.0231	0.1549	99.2793
Ol	735B_91R1_93A	3 / 1 .	518.35	rim	Ol-rich gabbro	39.9967	0.0035	0.0134	0.0623			0.2258	43.5365	15.435	0.0426	0.1422	99.458
Ol	735B_91R1_93A	5 / 1 .	518.35	rim	Ol-rich gabbro	39.6607	0	0.0184	0.0312			0.1993	43.478	15.405	0	0.1402	98.9328
Ol	735B_91R1_93A	23 / 1 .	518.345	rim	Ol-rich gabbro	39.5987	0.0133	0.0501	0.0283			0.2777	42.9581	16.2767	0	0.1754	99.3783
Ol	735B_91R1_93A	29 / 1 .	518.345	rim	Ol-rich gabbro	40.0278	0.0159	0	0.065			0.3193	43.2638	16.7021	0.0085	0.1636	100.566
Ol	735B_91R1_93A	39 / 1 .	518.343	rim	Ol-rich gabbro	39.9512	0.0177	0	0.0184			0.286	43.1402	16.2205	0.0281	0.1933	99.8554
Ol	735B_91R1_93A	44 / 1 .	518.343	rim	Ol-rich gabbro	39.6842	0.006	0	0.0232			0.2312	43.4661	15.8877	0	0.1787	99.4771
Ol	735B_91R1_93A	53 / 1 .	518.351	rim	Ol-rich gabbro	39.7902	0.0044	0	0.0635			0.2738	43.5671	16.0706	0	0.1902	99.9598
Ol	735B_91R1_93A	55 / 1 .	518.351	rim	Ol-rich gabbro	40.0489	0.0194	0	0.0311			0.2423	43.943	15.61	0.0511	0.2097	100.156
Ol	735B_91R1_93A	56 / 1 .	518.351	rim	Ol-rich gabbro	39.4637	0.011	0.0239	0.0433			0.2986	43.0927	16.2805	0.0114	0.1603	99.3854
Ol	735B_91R1_93A	70 / 1 .	518.334	rim	Ol-rich gabbro	39.9078	0	0	0.034			0.2274	43.6066	15.5528	0	0.1779	99.5065
Ol	735B_91R1_93A	72 / 1 .	518.334	rim	Ol-rich gabbro	39.8804	0.0027	0.05	0.0396			0.2476	43.8029	16.1789	0.0136	0.1819	100.398
Ol	735B_91R1_74	3 / 1 .	518.164	rim	Ol-rich gabbro	39.752	0.0124	0.01	0.0482			0.1848	43.1114	15.8467	0	0.1877	99.1532
Ol	735B_91R1_74	5 / 1 .	518.164	rim	Ol-rich gabbro	39.7882	0	0	0.0467			0.2236	43.6393	15.7906	0.0034	0.2237	99.7155
Ol	735B_91R1_74	21 / 1 .	518.164	rim	Ol-rich gabbro	39.4084	0	0.0136	0.0546			0.2744	43.8438	16.0362	0	0.1554	99.7864
Ol	735B_91R1_74	29 / 1 .	518.162	rim	Ol-rich gabbro	39.7279	0.0256	0.015	0.0453			0.2142	43.1661	15.7961	0	0.2031	99.1933
Ol	735B_91R1_74	32 / 1 .	518.154	rim	Ol-rich gabbro	39.7611	0.0062	0	0.0085			0.2287	43.2588	16.3805	0	0.2174	99.8612
Ol	735B_91R1_74	45 / 1 .	518.152	rim	Ol-rich gabbro	40.0031	0.0018	0.0217	0.0779			0.2516	42.8181	16.2618	0	0.1262	99.5622
Ol	735B_91R1_74	56 / 1 .	518.145	rim	Ol-rich gabbro	39.3076	0	0	0.0254			0.2966	42.5051	17.1911	0.028	0.2143	99.5681
Ol	735B_91R1_74	64 / 1 .	518.153	rim	Ol-rich gabbro	39.6536	0.0133	0	0.0382			0.2331	43.0501	16.5962	0.0127	0.1544	99.7516
Ol	735B_87R7_49	6 / 1 .	499.632	core	Troctolite	39.4611	0	0	0.0529			0.3171	42.2948	18.1598	0.065	0.1339	100.485
Ol	735B_87R7_49	8 / 1 .	499.632	core	Troctolite	39.492	0.0097	0	0.0014			0.3138	42.0638	17.8165	0	0.1142	99.8114
Ol	735B_87R7_49	16 / 1 .	499.635	core	Troctolite	39.3445	0.0035	0.0245	0.0235			0.3082	42.1021	17.7634	0.0124	0.209	99.7911
Ol	735B_87R7_49	21 / 1 .	499.635	core	Troctolite	39.4127	0.007	0.0408	0.0856			0.2622	41.6572	18.1985	0	0.1044	99.7684
Ol	735B_87R7_49	34 / 1 .	499.639	core	Troctolite	39.8055	0	0.0033	0.0641			0.22	42.1901	17.6421	0.0551	0.1596	100.14
Ol	735B_87R7_49	36 / 1 .	499.639	core	Troctolite	39.5232	0	0.0737	0.0498			0.2891	42.0303	18.2986	0.0066	0.1661	100.437
Ol	735B_87R7_49	37 / 1 .	499.639	core	Troctolite	39.3868	0	0	0.0362			0.3144	42.1022	17.9352	0.0175	0.1325	99.9248
Ol	735B_87R7_49	42 / 1 .	499.644	core	Troctolite	40.0031	0	0.0181	0.0445			0.2426	41.9591	17.523	0	0.1458	99.9362
Ol	735B_87R7_49	48 / 1 .	499.651	core	Troctolite	39.4718	0.0158	0.0491	0			0.3145	41.9557	18.1007	0	0.154	100.062
Ol	735B_87R7_49	50 / 1 .	499.651	core	Troctolite	39.8103	0.0035	0	0.0502			0.3466	41.8711	18.0071	0.0142	0.1401	100.243
Ol	735B_87R7_49	59 / 1 .	499.652	core	Troctolite	39.8012	0	0	0.0111			0.2967	42.1166	17.9039	0.0481	0.0823	100.26
Ol	735B_87R7_49	61 / 1 .	499.652	core	Troctolite	39.5488	0.0298	0.018	0.0125			0.2751	42.3372	17.8157	0.0033	0.0629	100.103
Ol	735B_87R7_49	62 / 1 .	499.657	core	Troctolite	39.5751	0.015	0	0.0306			0.3269	42.0671	18.2116	0.0142	0.1249	100.365
Ol	735B_80R2_7.5A	2 / 1 .	425.562	core	Troctolite	39.369	0.0071	0	0.0366			0.2593	41.7087	18.6253	0.0169	0.1219	100.145
Ol	735B_80R2_7.5A	15 / 1 .	425.561	core	Troctolite	39.7147	0.0159	0	0.0858			0.2915	42.2271	18.2958	0.0093	0.1362	100.776
Ol	735B_80R2_7.5A	20 / 1 .	425.562	core	Troctolite	39.3718	0.0044	0	0.0266			0.3831	40.3998	20.4815	0	0.1754	100.843
Ol	735B_80R2_7.5A	32 / 1 .	425.56	core	Troctolite	39.4522	0.0115	0.0083	0.0676			0.2564	40.9877	19.9321	0.0034	0.1142	100.833
Ol	735B_80R2_7.5A	48 / 1 .	425.557	core	Troctolite	38.951	0.0062	0	0.0647			0.3376	41.8387	18.785	0	0.1545	100.138
Ol	735B_80R2_7.5A	50 / 1 .	425.557	core	Troctolite	38.7665	0	0	0.0607			0.3281	41.4837	18.6194	0.0093	0.1642	99.4319
Ol	735B_80R2_7.5A	52 / 1 .	425.557	core	Troctolite	39.3138	0.008	0.0234	0.0512			0.2841	41.1243	18.5159	0	0.1531	99.4738
Ol	735B_80R2_7.5A	62 / 1 .	425.557	core	Troctolite	39.3812	0	0	0.0602			0.2788	41.9332	18.2984	0.0257	0.1161	100.094
Ol	735B_80R2_7.5A	63 / 1 .	425.557	core	Troctolite	39.2403	0.0132	0.01	0.0028			0.2534	40.9299	18.747	0	0.1473	99.3439
Ol	735B_80R2_7.5A	72 / 1 .	425.548	core	Troctolite	39.2685	0.0371	0	0.0592			0.2673	41.9214	18.3328	0.022	0.1611	100.069
Ol	735B_80R2_7.5A	74 / 1 .	425.548	core	Troctolite	39.6012	0	0.0032	0.0848			0.22	42.3158	18.2061	0	0.1442	100.575
Ol	735B_80R2_7.5A	77 / 1 .	425.551	core	Troctolite	39.516	0.0239	0	0.0325			0.3033	41.0141	19.1141	0.0262	0.1568	100.187
Ol	735B_80R2_7.5A	79 / 1 .	425.551	core	Troctolite	38.9851	0.023	0.0166	0.0409			0.3506	40.9281	20.0826	0	0.116	100.543
Ol	735B_89R1_47	1 / 1 .	505.273	core	Troctolite	39.8001	0.0102	0.0335	0.0609			0.2484	43.3448	16.7952	0.0341	0.1647	100.492
Ol	735B_89R1_47	10 / 1 .	505.275	core	Troctolite	39.8448	0.0115	0	0.0227			0.2099	43.3805	16.1076	0	0.1394	99.7164
Ol	735B_89R1_47	12 / 1 .	505.275	core	Troctolite	39.6848	0	0	0.0592			0.2551	43.488	16.5493	0	0.1226	100.159
Ol	735B_89R1_47	22 / 1 .	505.281	core	Troctolite	39.7417	0.0027	0.0067	0.0269			0.2202	43.2004	16.1848	0	0.1252	99.5086
Ol	735B_89R1_47	31 / 1 .	505.283	core	Troctolite	39.6241	0.0159	0	0.0466			0.3238	42.8883	16.7383	0	0.1536	99.7906
Ol	735B_89R1_47	43 / 1 .	505.291	core	Troctolite	39.9043	0	0.0067	0.0678			0.2284	43.6675	15.9143	0.0119	0.1633	99.9642
Ol	735B_89R1_47	46 / 1 .	505.292	core	Troctolite	40.0221	0.0231	0.0336	0.0726			0.2865	43.65	15.9963	0.0094	0.1447	100.238
Ol	735B_89R1_47	47 / 1 .	505.298	core	Troctolite	39.8898	0	0	0.0474			0.185	43.2565	15.8731	0.0078	0.1249	99.3845
Ol	735B_90R2_68	1	510.015	core	Troctolite	39.121	0.013	0.048	0.0446			0.2455	42.6938	17.1722	0	0.1397	99.4778
Ol	735B_90R2_68	20	510.015	core	Troctolite	39.1398	0.0119	0.0063	0.0648			0.245	42.8777	16.729	0.0179	0.1459	99.2383
Ol	735B_90R2_68	21	510.015	core	Troctolite	39.4127	0	0.0262	0.0261			0.2655	42.4324	17.2375	0	0.1667	99.5671
Ol	735B_90R2_68	26	510.015	core	Troctolite	39.2383	0.0729	0	0.0486			0.2551	42.6877	17.1748	0	0.1629	99.6403
Ol	735B_90R2_68	30	510.015	core	Troctolite	39.127	0	0.0182	0.0439			0.2822	42.7244	17.1781	0.0158	0.1725	99.5621
Ol	735B_90R2_68	31	510.015	core	Troctolite	39.0464	0.0041	0.0154	0.0477			0.2873	42.8766	16.9162	0	0.1316	99.3253
Ol	735B_90R2_68	35	510.015	core	Troctolite	39.2702	0.016	0.0091	0.0366			0.2919	42.2705	16.9198	0.0158	0.1257	98.9556
Ol	735B_90R2_68	39	510.015	core	Troctolite	39.0091	0	0.016	0.0521			0.3072	42.5339	17.2505	0.0068	0.1466	99.3222
Ol	735B_90R2_68	43	510.015	core	Troctolite	39.0638	0.0062	0.0069	0.0429			0.29	42.4799	17.6972	0	0.122	99.7089
Ol	735B_90R2_68	49	510.015	core	Troctolite	39.1472	0	0	0.0356			0.278	42.8061	17.2471	0.01	0.1325	99.6565
Ol	735B_87R7_49	7 / 1 .	499.632	rim	Troctolite	39.3353	0.0229	0.0082	0.0585			0.3056	41.896	18.2293	0	0.1008	99.9566
Ol	735B_87R7_49	9 / 1 .	499.632	rim	Troctolite	39.4241	0	0	0.007			0.2795	42.4837	17.4703	0	0.1308	99.7954
Ol	735B_87R7_49	15 / 1 .	499.635	rim	Troctolite	39.6948	0.0176	0.0181	0.0376			0.2803	42.4144	17.4366	0	0.1489	100.048
Ol	735B_87R7_49	17 / 1 .	499.635	rim	Troctolite	39.6066	0.0009	0	0.0446			0.2893	42.2309	17.4017	0.0109	0.1326	99.7175
Ol	735B_87R7_49	22 / 1 .	499.635	rim	Troctolite	39.7091	0.0291	0.0428	0.0473			0.3069	42.1529	17.7434	0.0425	0.185	100.259
Ol	735B_87R7_49	35 / 1 .	499.639	rim	Troctolite	39.7662	0.0035	0.005	0.0586			0.2694	42.793	17.3203	0.0318	0.1055	100.353
Ol	735B_87R7_49	43 / 1 .	499.644	rim	Troctolite	39.7035	0	0.0164	0.0775			0.3464	42.3552	17.7107	0	0.1824	100.392
Ol	735B_87R7_49	44 / 1 .	499.644	rim	Troctolite	39.6073	0.0026	0.0115	0.047			0.305	42.158	17.4316	0.0166	0.1972	99.7768
Ol	735B_87R7_49	49 / 1 .	499.651	rim	Troctolite	39.4456	0	0.0262	0.0483			0.2449	42.1326	17.9589	0	0.1687	100.025
Ol	735B_87R7_49	60 / 1 .	499.652	rim	Troctolite	39.0211	0	0.0409	0.0263			0.2834	41.7567	17.614	0.0132	0.0926	98.8482
Ol	735B_87R7_49	63 / 1 .	499.657	rim	Troctolite	39.7507	0.0053	0.0297	0.0376			0.2906	42.0543	17.6067	0	0.14	99.9149
Ol	735B_80R2_7.5A	1 / 1 .	425.562	rim	Troctolite	39.335	0.0133	0	0.0312			0.3388	41.1669	19.2755	0.0059	0.1942	100.361
Ol	735B_80R2_7.5A	3 / 1 .	425.562	rim	Troctolite	39.4069	0	0.0349	0.0621			0.338	41.8204	18.8356	0.0025	0.1836	100.684
Ol	735B_80R2_7.5A	16 / 1 .	425.561	rim	Troctolite	39.6292	0.0274	0.0382	0.0367			0.3223	41.3848	18.5867	0.0186	0.0814	100.125
Ol	735B_80R2_7.5A	33 / 1 .	425.56	rim	Troctolite	38.9579	0.0009	0	0.0562			0.3362	40.8172	19.6639	0.031	0.1577	100.021
Ol	735B_80R2_7.5A	34 / 1 .	425.56	rim	Troctolite	39.4659	0	0	0.0108			0.3385	41.2072	20.0406	0	0.1208	101.184
Ol	735B_80R2_7.5A	49 / 1 .	425.557	rim	Troctolite	39.1738	0.0009	0	0			0.2675	41.6831	18.2767	0	0.1522	99.5542
Ol	735B_80R2_7.5A	51 / 1 .	425.557	rim	Troctolite	39.3944	0.0185	0	0.0253			0.3092	41.088	18.6241	0	0.1531	99.6126
Ol	735B_80R2_7.5A	53 / 1 .	425.557	rim	Troctolite	39.4244	0.0044	0.01	0.0141			0.293	42.1215	18.6235	0.0245	0.1557	100.671
Ol	735B_80R2_7.5A	61 / 1 .	425.557	rim	Troctolite	39.2758	0.0097	0.0232	0.0549			0.3123	41.4876	18.4583	0.0126	0.1471	99.7815
Ol	735B_80R2_7.5A	73 / 1 .	425.548	rim	Troctolite	39.376	0	0.0216	0.0479			0.274	41.8691	18.4345	0.0017	0.1325	100.157
Ol	735B_80R2_7.5A	75 / 1 .	425.548	rim	Troctolite	39.3467	0	0.0266	0.031			0.285	42.1717	17.8556	0.0093	0.1635	99.8894
Ol	735B_80R2_7.5A	76 / 1 .	425.551	rim	Troctolite	39.5334	0	0.073	0.0324			0.2898	41.8397	18.2191	0.0135	0.2238	100.225
Ol	735B_80R2_7.5A	78 / 1 .	425.551	rim	Troctolite	39.4446	0	0.01	0.0848			0.2817	41.3314	19.1367	0	0.1553	100.445
Ol	735B_89R1_47	2 / 1 .	505.273	rim	Troctolite	39.5895	0.0102	0.0767	0.0555			0.2958	42.8859	16.6612	0.0089	0.1141	99.6978
Ol	735B_89R1_47	11 / 1 .	505.275	rim	Troctolite	39.8436	0.0265	0	0.0282			0.2149	43.8262	16.3487	0.0127	0.1343	100.435
Ol	735B_89R1_47	13 / 1 .	505.275	rim	Troctolite	39.9435	0.037	0	0.0014			0.273	43.3854	16.0023	0.0255	0.1348	99.8029
Ol	735B_89R1_47	23 / 1 .	505.281	rim	Troctolite	39.8361	0.0151	0.0101	0			0.2812	43.0996	16.4063	0.0257	0.1408	99.8149
Ol	735B_89R1_47	30 / 1 .	505.283	rim	Troctolite	39.5662	0	0	0.0283			0.2631	43.1794	16.1959	0.0008	0.1675	99.4012
Ol	735B_89R1_47	42 / 1 .	505.291	rim	Troctolite	39.7636	0.0088	0.045	0.0762			0.213	43.1593	15.9414	0	0.1404	99.3477
Ol	735B_89R1_47	48 / 1 .	505.298	rim	Troctolite	39.826	0	0	0.066			0.2611	43.7277	16.0999	0	0.116	100.097
Ol	735B_90R2_68	2	510.015	rim	Troctolite	39.2081	0.001	0	0.0437			0.2741	42.9219	16.9257	0.0184	0.1499	99.5428
Ol	735B_90R2_68	19	510.015	rim	Troctolite	39.2499	0.0083	0	0.0307			0.3002	43.0005	16.544	0	0.1512	99.2848
Ol	735B_90R2_68	22	510.015	rim	Troctolite	39.0581	0.0078	0	0.0401			0.2417	42.6334	17.3032	0.0105	0.1698	99.4646
Ol	735B_90R2_68	25	510.015	rim	Troctolite	39.8014	0.0325	0	0.1953			0.2752	42.8193	17.104	0	0.1562	100.384
Ol	735B_90R2_68	29	510.015	rim	Troctolite	38.9254	0	0.0307	0.0316			0.3132	42.3702	17.4777	0.0005	0.1733	99.3226
Ol	735B_90R2_68	32	510.015	rim	Troctolite	38.7264	0.0196	0	0.0398			0.2691	42.3702	17.0944	0.0378	0.1165	98.6738
Ol	735B_90R2_68	36	510.015	rim	Troctolite	39.2187	0.0015	0	0.0432			0.2986	42.3122	17.3202	0	0.1515	99.3459
Ol	735B_90R2_68	40	510.015	rim	Troctolite	38.9868	0.0253	0	0.033			0.25	42.2302	17.2852	0.0488	0.1754	99.0347
Ol	735B_90R2_68	48	510.015	rim	Troctolite	39.2065	0.0147	0.0075	0.0476			0.2911	43.2214	16.9583	0	0.1628	99.9099
Mineral	Sample	Point	Depth (mbsf)	Grain area	Lithology	SiO2	Al2O3	TiO2	CaO	Na2O	K2O	MnO	MgO	FeO	Cr2O3	NiO	Total
Ol	Counting time (s) - per element					10	10	10	10			10	10	10	10	10
Ol	735B_57R3_ 66	13	278.61	core	Ol-bearing gabbro	37.4819			0.059144			0.421911	33.9256	28.7893		0.042928	100.721
Ol	735B_57R3_66	24	278.61	core	Ol-bearing gabbro	37.7247			0.02825			0.415289	34.6505	27.9501		0.03203	100.801
Ol	735B_58R3_46	68	283.73	core	Ol-bearing gabbro	37.3264			0.049662			0.385485	36.2199	26.8916		0.066464	100.94
Ol	735B_58R3_46	80	283.73	core	Ol-bearing gabbro	37.789			0.078734			0.397338	35.8074	27.2687		0.014	101.355
Ol	735B_59R3_43	90	288.43	core	Ol-bearing gabbro	37.3189			0.045539			0.347977	34.8221	26.7865		0.017707	99.3387
Ol	735B_59R3_43	99	288.43	core	Ol-bearing gabbro	37.5229			0.039913			0.399237	35.2579	27.8238		0.050609	101.094
Ol	735B_61R3_100	152	299.45	core	Ol-bearing gabbro	37.6383			0.047242			0.36809	36.3307	25.7041		0.03023	100.119
Ol	735B_61R3_100	162	299.45	core	Ol-bearing gabbro	37.1601			0.036019			0.386232	35.2652	26.5813		0.048376	99.4772
Ol	735B_67R2_0	265	331.42	core	Ol-bearing gabbro	37.9885			0.047549			0.384349	37.0914	23.8829		0.097668	99.4924
Ol	735B_67R2_0	286	331.42	core	Ol-bearing gabbro	38.4827			0.04047			0.302636	38.5591	23.3425		0.131307	100.859
Ol	735B_57R3_66	19	278.61	rim	Ol-bearing gabbro	37.7121			0.045615			0.386561	34.0864	28.7023		0.046281	100.979
Ol	735B_57R3_66	30	278.61	rim	Ol-bearing gabbro	37.5946			0.027639			0.396946	35.0126	27.8947		0.117079	101.044
Ol	735B_58R3_46	75	283.73	rim	Ol-bearing gabbro	37.6526			0.012266			0.372903	36.2109	25.8644		0.039588	100.153
Ol	735B_58R3_46	85	283.73	rim	Ol-bearing gabbro	37.2071			0.04806			0.410362	35.4236	26.9342		0.096548	100.12
Ol	735B_59R3_43	94	288.43	rim	Ol-bearing gabbro	38.1204			0.004307			0.373668	36.3638	25.4945		0.043912	100.401
Ol	735B_59R3_43	108	288.43	rim	Ol-bearing gabbro	37.4054			0.055101			0.437675	34.6567	27.2754		0.051535	99.8818
Ol	735B_61R3_100	157	299.45	rim	Ol-bearing gabbro	37.6299			0.034518			0.413717	36.0823	25.6641		0.082041	99.9066
Ol	735B_61R3_100	167	299.45	rim	Ol-bearing gabbro	36.7429			0.017534			0.423327	35.1013	26.7503		0.085492	99.1209
Ol	735B_67R2_0	271	331.42	rim	Ol-bearing gabbro	38.3591			0.043724			0.415497	37.3091	24.3494		0.107886	100.585
Ol	735B_67R2_0	291	331.42	rim	Ol-bearing gabbro	38.4942			0.054713			0.3395	37.8572	23.5525		0.08636	100.384
Ol	735B_60R3_27	113	293.19	core	Ol-gabbro	37.0659			0.04416			0.351113	36.0752	26.9747		0.106244	100.617
Ol	735B_60R3_27	123	293.19	core	Ol-gabbro	37.7119			0.03815			0.362937	35.6758	26.9628		0.033648	100.785
Ol	735B_61R3_66	132	299.11	core	Ol-gabbro	37.2394			0.037467			0.335113	35.5589	27.2106		0.047344	100.429
Ol	735B_61R3_66	142	299.11	core	Ol-gabbro	37.1864			0.01821			0.375684	35.8984	27.5329		0.060199	101.072
Ol	735B_63R1_20	172	305.72	core	Ol-gabbro	37.705			0.06958			0.420001	35.7182	26.9392		0.031923	100.884
Ol	735B_63R1_20	182	305.72	core	Ol-gabbro	37.5769			0.049205			0.412366	35.808	26.9044		0.066433	100.817
Ol	735B_63R4_32	192	309.95	core	Ol-gabbro	38.3294			0.058478			0.397246	36.7523	24.885		0.078759	100.501
Ol	735B_63R4_32	202	309.95	core	Ol-gabbro	38.0479			0.052929			0.325305	35.94	25.9703		0.069083	100.406
Ol	735B_66R1_57	244	325.59	core	Ol-gabbro	38.5058			0.048397			0.340339	40.0072	21.9392		0.104595	100.946
Ol	735B_66R1_57	254	325.59	core	Ol-gabbro	37.7488			0.014784			0.296288	40.2064	21.7729		0.096847	100.136
Ol	735B_69R2_110	306	343.4	core	Ol-gabbro	38.5461			0.084697			0.282426	37.9415	22.322		0.134214	99.3109
Ol	735B_69R2_110	316	343.4	core	Ol-gabbro	37.9714			0.072943			0.283565	37.5809	22.3992		0.077672	98.3857
Ol	735B_69R2_110	327	343.4	core	Ol-gabbro	37.9701			0.064241			0.329243	38.0606	22.774		0.146723	99.3449
Ol	735B_71R2_34	337	352.71	core	Ol-gabbro	38.1402			0.061396			0.346752	39.8169	21.9651		0.088227	100.419
Ol	735B_71R2_34	346	352.71	core	Ol-gabbro	38.508			0.047769			0.347626	40.4998	20.9846		0.122968	100.511
Ol	735B_72R3_87	356	356.89	core	Ol-gabbro	37.7247			0.09756			0.300394	38.6647	23.5665		0.06126	100.415
Ol	735B_72R3_87	366	356.89	core	Ol-gabbro	38.0771			0.065365			0.376786	38.872	23.3497		0.108815	100.85
Ol	735B_72R3_87	376	356.89	core	Ol-gabbro	37.6456			0.057515			0.334076	38.2392	24.1118		0.114828	100.503
Ol	735B_72R7_25	385	364.53	core	Ol-gabbro	38.5938			0.043465			0.342585	40.0833	20.8203		0.090761	99.9742
Ol	735B_72R7_25	407	364.53	core	Ol-gabbro	39.0288			0.035393			0.306219	40.0432	21.2196		0.062063	100.695
Ol	735B_73R7_60	423	374.4	core	Ol-gabbro	38.8157			0.053978			0.365026	38.8941	20.6599		0.124645	98.9133
Ol	735B_73R7_60	433	374.4	core	Ol-gabbro	38.8026			0.170578			0.362722	38.8198	20.9713		0.154255	99.2813
Ol	735B_74R4_98	447	380.46	core	Ol-gabbro	39.3301			0.055928			0.29564	39.7086	20.1421		0.118255	99.6506
Ol	735B_74R4_98	457	380.46	core	Ol-gabbro	37.6526			0.102209			0.24648	38.5784	18.7407		0.039813	95.3602
Ol	735B_74R5_41	467	381.31	core	Ol-gabbro	38.7855			0.055021			0.297353	41.1259	19.599		0.13625	99.999
Ol	735B_74R5_41	477	381.31	core	Ol-gabbro	39.2628			0.028395			0.297726	41.0425	19.8823		0.039891	100.554
Ol	735B_75R1_104	497	385.56	core	Ol-gabbro	38.7359			0.048625			0.327871	40.2643	21.2276		0.085053	100.689
Ol	735B_75R3_44	508	387.7	core	Ol-gabbro	37.3264			0.025797			0.322559	40.716	20.0787		0.120052	98.5895
Ol	735B_75R3_44	515	387.7	core	Ol-gabbro	38.0208			0.049577			0.297574	40.3033	19.8358		0.079848	98.5869
Ol	735B_75R7_31	525	392.94	core	Ol-gabbro	37.5581			0.020179			0.327801	37.7439	22.1681		0.118108	97.9362
Ol	735B_75R7_31	541	392.94	core	Ol-gabbro	38.0641			0.051316			0.364206	38.3517	22.0526		0.097389	98.9813
Ol	735B_75R7_31	555	392.94	core	Ol-gabbro	37.5679			0.004955			0.34942	37.6431	22.2845		0.087742	97.9376
Ol	735B_75R7_31	564	392.94	core	Ol-gabbro	37.8931			0.034824			0.314062	38.2417	22.0199		0.091586	98.5952
Ol	735B_60R3_27	118	293.19	rim	Ol-gabbro	37.5117			0.016013			0.437503	36.1232	26.3648		0.103703	100.557
Ol	735B_60R3_27	127	293.19	rim	Ol-gabbro	37.0041			0.022808			0.395837	35.9312	26.186		0.100982	99.6409
Ol	735B_61R3_66	137	299.11	rim	Ol-gabbro	37.2898			0.040932			0.371347	35.5684	26.4385		0.087778	99.7968
Ol	735B_61R3_66	147	299.11	rim	Ol-gabbro	37.1938			0.051889			0.443535	35.0806	27.021		0.069662	99.8605
Ol	735B_63R1_20	177	305.72	rim	Ol-gabbro	37.5022			0.061073			0.388046	35.2102	26.7671		0.104408	100.033
Ol	735B_63R1_20	187	305.72	rim	Ol-gabbro	37.0674			0.058364			0.375836	35.3314	26.8512		0.058671	99.7429
Ol	735B_63R4_32	197	309.95	rim	Ol-gabbro	37.7037			0.009347			0.3718	36.2877	25.1121		0.074401	99.559
Ol	735B_63R4_32	207	309.95	rim	Ol-gabbro	37.9103			0.008606			0.434652	35.3547	26.2525		0.108747	100.07
Ol	735B_66R1_57	249	325.59	rim	Ol-gabbro	19.0011			0.056997			0.333398	29.4851	19.1061		0.09109	68.0738
Ol	735B_66R1_57	260	325.59	rim	Ol-gabbro	38.1804			0.023927			0.301029	40.0929	21.6356		0.132315	100.366
Ol	735B_69R2_110	311	343.4	rim	Ol-gabbro	38.471			0.056985			0.28357	38.3203	22.054		0.085981	99.2718
Ol	735B_69R2_110	322	343.4	rim	Ol-gabbro	28.0282			0.040205			0.299944	35.8243	20.4255		0.11929	84.7374
Ol	735B_69R2_110	332	343.4	rim	Ol-gabbro	38.1379			0.016099			0.327764	38.2265	21.7113		0.071006	98.4906
Ol	735B_71R2_34	341	352.71	rim	Ol-gabbro	38.1274			0.068001			0.266257	39.6964	21.0129		0.133332	99.3043
Ol	735B_71R2_34	351	352.71	rim	Ol-gabbro	38.0045			0.04581			0.289378	40.318	20.4424		0.077968	99.1781
Ol	735B_72R3_87	361	356.89	rim	Ol-gabbro	18.5607			0.080459			0.384011	27.9418	20.2809		0.102868	67.3507
Ol	735B_72R3_87	371	356.89	rim	Ol-gabbro	38.386			0.043539			0.369398	38.983	22.7047		0.10283	100.589
Ol	735B_72R3_87	380	356.89	rim	Ol-gabbro	37.7531			0.054855			0.34663	38.2722	23.7278		0.060443	100.215
Ol	735B_72R7_25	389	364.53	rim	Ol-gabbro	39.248			0.036308			0.299654	40.2612	20.7691		0.078095	100.692
Ol	735B_72R7_25	411	364.53	rim	Ol-gabbro	38.9997			0.032189			0.302252	40.4784	20.8147		0.135088	100.762
Ol	735B_73R7_60	428	374.4	rim	Ol-gabbro	38.6199			0.04487			0.336625	39.2557	21.5012		0.129001	99.8873
Ol	735B_73R7_60	442	374.4	rim	Ol-gabbro	38.4445			0.018738			0.371512	38.8019	21.8688		0.067398	99.5728
Ol	735B_74R4_98	452	380.46	rim	Ol-gabbro	38.633			0.027675			0.359355	39.1828	19.9021		0.086406	98.1913
Ol	735B_74R4_98	462	380.46	rim	Ol-gabbro	38.2108			0.007003			0.31297	39.2774	18.5788		0.080235	96.4672
Ol	735B_74R5_41	472	381.31	rim	Ol-gabbro	39.1582			0.004706			0.265032	40.8968	19.5352		0.027206	99.8871
Ol	735B_74R5_41	482	381.31	rim	Ol-gabbro	39.554			0.006046			0.324111	41.4314	19.3311		0.077791	100.724
Ol	735B_75R1_104	492	385.56	rim	Ol-gabbro	37.5063			0.031858			0.323829	40.4195	20.7897		0.103558	99.1747
Ol	735B_75R1_104	503	385.56	rim	Ol-gabbro	38.6616			0.034384			0.317684	40.2201	21.3043		0.055502	100.594
Ol	735B_75R3_44	509	387.7	rim	Ol-gabbro	37.8868			0.031184			0.298102	41.0282	20.8546		0.125366	100.224
Ol	735B_75R3_44	520	387.7	rim	Ol-gabbro	38.504			0.03377			0.283039	40.4651	19.8907		0.065834	99.2424
Ol	735B_75R7_31	535	392.94	rim	Ol-gabbro	38.191			0.019048			0.333676	38.7947	21.5843		0.136203	99.0589
Ol	735B_75R7_31	549	392.94	rim	Ol-gabbro	38.0463			0.017022			0.273511	38.4904	21.8929		0.052949	98.7731
Ol	735B_75R7_31	558	392.94	rim	Ol-gabbro	37.9091			0			0.291289	38.0576	22.9342		0.091263	99.2835
Ol	735B_75R7_31	569	392.94	rim	Ol-gabbro	37.7434			0.065094			0.293024	38.0302	23.1372		0.098271	99.3672
Ol	735B_86R6_33	1033	488.7	core	Ol-bearing gabbro	37.7879			0.087975			0.337569	35.5073	23.1891		0.137532	97.0474
Ol	735B_86R6_33	1043	488.7	core	Ol-bearing gabbro	38.3849			0.041407			0.296329	37.9511	22.038		0.186215	98.898
Ol	735B_86R6_33	1038	488.7	rim	Ol-bearing gabbro	37.9267			0.063902			0.297888	38.498	22.5199		0.120302	99.4267
Ol	735B_86R6_33	1047	488.7	rim	Ol-bearing gabbro	38.7047			0.030136			0.34513	38.2411	22.5711		0.041738	99.9339
Ol	735B_76R2_8	574	395.43	core	Ol-gabbro	38.0821			0.042796			0.344325	40.5765	20.3364		0.042339	99.4245
Ol	735B_76R2_8	584	395.43	core	Ol-gabbro	38.6502			0.058598			0.334891	40.4538	20.4584		0.086287	100.042
Ol	735B_76R5_104	604	400.48	core	Ol-gabbro	37.6064			0.015198			0.308898	38.4727	23.7439		0.096323	100.243
Ol	735B_76R5_104	614	400.48	core	Ol-gabbro	37.8483			0.184142			0.358617	37.5858	24.7106		0.150017	100.837
Ol	735B_76R5_49	625	399.93	core	Ol-gabbro	38.1629			0.069852			0.322865	40.2682	21.5073		0.086128	100.417
Ol	735B_76R5_49	635	399.93	core	Ol-gabbro	38.179			0.029085			0.256712	39.7366	21.9355		0.092798	100.23
Ol	735B_78R4_29	670	414.08	core	Ol-gabbro	37.8218			0.072238			0.428856	35.6578	26.0469		0.153629	100.181
Ol	735B_78R4_29	678	414.08	core	Ol-gabbro	38.4511			0.048626			0.266989	41.1039	20.7335		0.143267	100.747
Ol	735B_79R7_104	686	424.34	core	Ol-gabbro	38.3869			0.039495			0.33117	39.816	22.1601		0.094761	100.828
Ol	735B_79R7_104	693	424.34	core	Ol-gabbro	38.6671			0.044063			0.334766	39.471	22.4358		0.085134	101.038
Ol	735B_79R7_104	700	424.34	core	Ol-gabbro	38.263			0.028003			0.30715	39.6993	22.4606		0.08343	100.841
Ol	735B_79R7_104	708	424.34	core	Ol-gabbro	38.1151			0.036562			0.364998	39.1791	22.9511		0.127681	100.775
Ol	735B_79R7_104	715	424.34	core	Ol-gabbro	38.1806			0.028275			0.341211	39.238	23.1439		0.149389	101.081
Ol	735B_79R7_104	722	424.34	core	Ol-gabbro	38.2681			0.045486			0.317815	39.5965	22.1841		0.090891	100.503
Ol	735B_79R7_104	729	424.34	core	Ol-gabbro	38.2416			0.035808			0.342586	39.0067	23.1535		0.174529	100.955
Ol	735B_79R7_104	738	424.34	core	Ol-gabbro	37.5474			0.044946			0.376489	35.9287	26.0608		0.077033	100.035
Ol	735B_80R2_89	748	426.39	core	Ol-gabbro	38.4631			0.075407			0.349212	40.2079	21.8581		0.157309	101.111
Ol	735B_80R2_89	761	426.39	core	Ol-gabbro	38.0445			0.048486			0.368745	36.9879	25.1824		0.081897	100.714
Ol	735B_80R4_98	770	429.39	core	Ol-gabbro	39.2127			0.037381			0.193194	42.5789	18.8781		0.103395	101.004
Ol	735B_80R4_98	781	429.39	core	Ol-gabbro	38.7456			0.03259			0.231737	44.2477	16.8624		0.189541	100.31
Ol	735B_80R4_98	789	429.39	core	Ol-gabbro	37.589			0.052697			0.228159	42.7532	18.8048		0.131383	99.5592
Ol	735B_81R5_2	844	439.21	core	Ol-gabbro	38.2934			0.040288			0.346692	40.4703	20.9079		0.069192	100.128
Ol	735B_83R3_112	880	456.65	core	Ol-gabbro	36.9372			0.027113			0.410347	34.6131	26.0078		0.045956	98.0415
Ol	735B_83R3_112	890	456.65	core	Ol-gabbro	36.6461			0.005773			0.39019	33.1747	27.5457		0.080251	97.8427
Ol	735B_84R1_120	968	463.22	core	Ol-gabbro	37.9526			0.03326			0.392498	34.536	25.8472		0	98.7616
Ol	735B_84R1_120	977	463.22	core	Ol-gabbro	37.8409			0.037989			0.389276	36.2164	23.8651		0.055862	98.4055
Ol	735B_84R6_56	987	469.29	core	Ol-gabbro	37.0249			0.029268			0.366724	36.3375	25.768		0.067047	99.5934
Ol	735B_85R7_22	998	480.14	core	Ol-gabbro	38.7069			0			0.263602	43.3447	17.4793		0.149982	99.9445
Ol	735B_85R7_22	1007	480.135	core	Ol-gabbro	38.5297			0.028467			0.23092	43.3535	17.2225		0.107765	99.4729
Ol	735B_86R3_97	1014	484.99	core	Ol-gabbro	37.3333			0.000378			0.374749	35.0404	26.9681		0	99.717
Ol	735B_86R3_97	1024	484.99	core	Ol-gabbro	36.6355			0			0.375215	35.7669	26.4784		0.040041	99.2961
Ol	735B_87R1_11	1052	490.62	core	Ol-gabbro	36.1033			0.030896			0.480742	30.19	33.5968		0	100.402
Ol	735B_87R1_11	1062	490.62	core	Ol-gabbro	36.6517			0.041353			0.474725	30.4765	33.5016		0.041751	101.188
Ol	735B_88N1_33	1090	500.35	core	Ol-gabbro	38.6924			0.022848			0.230484	41.3519	19.151		0.170888	99.6195
Ol	735B_88N1_33	1100	500.35	core	Ol-gabbro	39.2653			0.011293			0.271026	42.2575	18.0983		0.128138	100.031
Ol	735B_90R1_97	1129	508.8	core	Ol-gabbro	39.0257			0.071996			0.280165	42.4794	18.5189		0.164205	100.54
Ol	735B_90R1_97	1143	508.8	core	Ol-gabbro	39.1945			0.069904			0.30977	43.0555	16.9164		0.105766	99.6518
Ol	735B_90R6_126	1157	515.79	core	Ol-gabbro	38.7774			0.0807			0.240292	42.2576	17.1086		0.165775	98.6304
Ol	735B_90R6_126	1167	515.79	core	Ol-gabbro	39.0884			0.011967			0.330259	42.5322	17.2986		0.141109	99.4025
Ol	735B_90R6_126	1181	515.79	core	Ol-gabbro	39.265			0.026214			0.262027	42.3192	17.0495		0.126473	99.0484
Ol	735B_91R3_133	1230	521.29	core	Ol-gabbro	38.5464			0.056034			0.329852	38.5819	21.3031		0.143587	98.9609
Ol	735B_91R3_133	1240	521.29	core	Ol-gabbro	38.5282			0.049992			0.411641	38.7809	21.2962		0.100854	99.1678
Ol	735B_92R2_97.5	1250	529.37	core	Ol-gabbro	37.2091			0.038442			0.402281	32.653	28.6629		0.07074	99.0365
Ol	735B_92R2_97.5	1260	529.37	core	Ol-gabbro	37.2967			0.032724			0.432722	32.4838	29.0447		0.023021	99.3136
Ol	735B_76R2_8	579	395.43	rim	Ol-gabbro	38.7952			0.048255			0.291989	40.4402	20.8766		0.09714	100.549
Ol	735B_76R2_8	589	395.43	rim	Ol-gabbro	38.2531			0.035348			0.308699	40.6576	20.5673		0.043524	99.8656
Ol	735B_76R5_104	609	400.48	rim	Ol-gabbro	37.8111			0.025033			0.340816	38.14	23.8172		0.101495	100.236
Ol	735B_76R5_104	620	400.48	rim	Ol-gabbro	37.8873			0.055768			0.386187	37.9865	23.8227		0.069599	100.208
Ol	735B_76R5_49	630	399.93	rim	Ol-gabbro	38.3014			0.012453			0.286556	39.9553	22.1677		0.101478	100.825
Ol	735B_76R5_49	640	399.93	rim	Ol-gabbro	38.2064			0.029934			0.292166	39.9027	21.7258		0.082625	100.24
Ol	735B_78R4_29	674	414.08	rim	Ol-gabbro	36.825			0.031903			0.472488	33.5949	29.2739		0.129219	100.327
Ol	735B_78R4_29	682	414.08	rim	Ol-gabbro	38.6885			0.056513			0.302239	41.1745	20.9745		0.115606	101.312
Ol	735B_79R7_104	687	424.34	rim	Ol-gabbro	38.5772			0.047899			0.318755	40.1434	22.0381		0.096503	101.222
Ol	735B_79R7_104	694	424.34	rim	Ol-gabbro	38.6941			0.045132			0.316405	39.7727	22.3642		0.038209	101.231
Ol	735B_79R7_104	701	424.34	rim	Ol-gabbro	38.6128			0.049874			0.320284	39.2879	22.3233		0.117331	100.711
Ol	735B_79R7_104	716	424.34	rim	Ol-gabbro	38.1647			0.045447			0.335417	38.8564	22.4222		0.126741	99.9509
Ol	735B_79R7_104	723	424.34	rim	Ol-gabbro	38.3332			0.026179			0.34372	39.3439	22.2528		0.083008	100.383
Ol	735B_79R7_104	732	424.34	rim	Ol-gabbro	38.1057			0.037379			0.367842	39.0124	23.2772		0.123108	100.924
Ol	735B_79R7_104	743	424.34	rim	Ol-gabbro	37.6821			0.06813			0.392734	36.1782	25.7916		0.093579	100.206
Ol	735B_80R2_89	755	426.39	rim	Ol-gabbro	37.933			0.080265			0.260098	39.9247	21.7857		0.145063	100.129
Ol	735B_80R2_89	764	426.39	rim	Ol-gabbro	37.4793			0.038273			0.405694	37.381	25.2179		0.132402	100.655
Ol	735B_80R4_98	775	429.39	rim	Ol-gabbro	38.4217			0.046267			0.259807	42.1651	18.8655		0.145492	99.9039
Ol	735B_80R4_98	783	429.39	rim	Ol-gabbro	38.6088			0.034985			0.194913	44.8159	16.8475		0.163309	100.665
Ol	735B_80R4_98	794	429.39	rim	Ol-gabbro	38.9933			0.030201			0.285777	42.7027	19.0582		0.112119	101.182
Ol	735B_81R5_2	849	439.21	rim	Ol-gabbro	38.8305			0.043873			0.276258	40.3852	20.8282		0.038103	100.402
Ol	735B_83R3_112	885	456.65	rim	Ol-gabbro	37.2115			0.040793			0.37916	34.7613	26.5595		0.073205	99.0255
Ol	735B_83R3_112	896	456.65	rim	Ol-gabbro	36.6731			0.052308			0.488099	32.6797	29.7929		0.059071	99.7452
Ol	735B_84R1_120	972	463.22	rim	Ol-gabbro	38.6876			0.064085			0.417699	34.8098	25.8961		0.137608	100.013
Ol	735B_84R1_120	982	463.22	rim	Ol-gabbro	38.212			0.026705			0.332599	36.5012	24.4712		0.064633	99.6083
Ol	735B_84R6_56	993	469.29	rim	Ol-gabbro	37.2557			0.06753			0.340093	36.7237	25.6044		0.051553	100.043
Ol	735B_85R7_22	1002	480.14	rim	Ol-gabbro	39.9401			0.029352			0.293828	43.9214	17.4518		0.184779	101.821
Ol	735B_85R7_22	1009	480.135	rim	Ol-gabbro	38.8727			0.0383			0.261789	43.2488	17.3711		0.0885	99.8811
Ol	735B_86R3_97	1019	484.99	rim	Ol-gabbro	37.4756			0.048641			0.354884	36.1135	26.7064		0.041928	100.741
Ol	735B_86R3_97	1028	484.99	rim	Ol-gabbro	38.0307			0.046074			0.367307	37.8718	26.8288		0.059138	103.204
Ol	735B_87R1_11	1057	490.62	rim	Ol-gabbro	35.7296			0.037748			0.502356	30.2207	32.7886		0	99.279
Ol	735B_87R1_11	1067	490.62	rim	Ol-gabbro	36.2923			0.016028			0.499306	30.3196	32.9999		0.020898	100.148
Ol	735B_88N1_33	1095	500.35	rim	Ol-gabbro	39.2088			0.025816			0.278146	41.7696	18.5049		0.12603	99.9132
Ol	735B_88N1_33	1104	500.35	rim	Ol-gabbro	38.8797			0.002379			0.239316	42.4832	18.3809		0.084006	100.07
Ol	735B_90R1_97	1136	508.8	rim	Ol-gabbro	38.9285			0.043617			0.33449	42.2443	18.5324		0.132028	100.215
Ol	735B_90R1_97	1151	508.8	rim	Ol-gabbro	39.2112			0.059572			0.286596	43.1968	17.0293		0.106628	99.8901
Ol	735B_90R6_126	1162	515.79	rim	Ol-gabbro	39.094			0.017239			0.273099	42.1499	17.6438		0.112206	99.2902
Ol	735B_90R6_126	1175	515.79	rim	Ol-gabbro	38.9706			0.056576			0.249939	42.4512	17.3298		0.13998	99.1981
Ol	735B_90R6_126	1186	515.79	rim	Ol-gabbro	38.9857			0.041192			0.323096	42.3405	17.8995		0.052946	99.6429
Ol	735B_91R3_133	1235	521.29	rim	Ol-gabbro	38.5935			0.039066			0.37403	37.7598	22.5295		0.10233	99.3982
Ol	735B_91R3_133	1245	521.29	rim	Ol-gabbro	37.9679			0.026831			0.340385	38.6909	21.8562		0.168256	99.0504
Ol	735B_92R2_97.5	1255	529.37	rim	Ol-gabbro	37.3097			0.012374			0.414604	32.8435	28.6407		0.03456	99.2554
Ol	735B_92R2_97.5	1265	529.37	rim	Ol-gabbro				0.031065			0.411944	32.4526	29.0047		0.042789	61.9431
Ol	735B_82R2_6	854	444.57	core	Ol-rich gabbro	39.152			0.047675			0.249554	41.9429	17.1701		0.089198	98.6514
Ol	735B_82R2_6	863	444.57	core	Ol-rich gabbro	38.9053			0.026112			0.302441	40.6995	17.988		0.107552	98.0289
Ol	735B_82R2_6	872	444.57	core	Ol-rich gabbro	38.6393			0.05965			0.257354	41.452	17.7893		0.144511	98.3421
Ol	735B_91R1_48	1191	517.91	core	Ol-rich gabbro	39.811			0.016493			0.172914	44.8148	16.4329		0.213245	101.461
Ol	735B_91R1_48	1201	517.91	core	Ol-rich gabbro	39.6072			0.070638			0.214048	44.1194	16.1752		0.143811	100.33
Ol	735B_91R1_48	1211	517.91	core	Ol-rich gabbro	39.1349			0.018607			0.172447	44.2923	15.4149		0.155504	99.1886
Ol	735B_91R1_48	1220	517.91	core	Ol-rich gabbro	39.6729			0.040769			0.204773	44.0905	14.707		0.133743	98.8496
Ol	735B_82R2_6	858	444.57	rim	Ol-rich gabbro	39.3562			0.072008			0.27642	42.139	17.8158		0.120627	99.7801
Ol	735B_82R2_6	867	444.57	rim	Ol-rich gabbro	38.718			0.048374			0.320123	40.8965	18.0901		0.062389	98.1355
Ol	735B_82R2_6	876	444.57	rim	Ol-rich gabbro	38.7628			0.044298			0.305428	41.6166	18.2319		0.063294	99.0243
Ol	735B_91R1_48	1196	517.91	rim	Ol-rich gabbro	39.5821			0.017677			0.256915	44.28	15.5431		0.170448	99.8501
Ol	735B_91R1_48	1206	517.91	rim	Ol-rich gabbro	39.3128			0.066427			0.231372	44.1701	16.5107		0.097333	100.389
Ol	735B_91R1_48	1215	517.91	rim	Ol-rich gabbro	39.1153			0.042653			0.194902	44.4079	15.0493		0.157198	98.9673
Ol	735B_91R1_48	1225	517.91	rim	Ol-rich gabbro	38.8692			0.012975			0.274583	44.7986	14.8896		0.155089	99.0001
Ol	735B_83R7_5	901	461.33	core	Troctolite	39.1052			0.04178			0.286725	43.6177	17.6114		0.053064	100.716
Ol	735B_83R7_5	912	461.33	core	Troctolite	38.7851			0.020374			0.271069	42.6831	18.1777		0.154196	100.092
Ol	735B_83R7_5	920	461.33	core	Troctolite	38.7605			0.023195			0.263119	42.3378	17.4601		0.141338	98.9861
Ol	735B_83R7_5	928	461.33	core	Troctolite	38.7813			0.066211			0.290425	43.4536	17.317		0.06117	99.9697
Ol	735B_83R8_7	938	462.84	core	Troctolite	39.6311			0.023519			0.223403	44.6799	15.2151		0.291633	100.065
Ol	735B_83R8_7	949	462.84	core	Troctolite	39.7369			0.087825			0.211209	44.288	15.8956		0.260677	100.48
Ol	735B_83R8_7	958	462.84	core	Troctolite	40.0128			0.023485			0.210041	44.1872	15.7275		0.188405	100.349
Ol	735B_89R2_9	1109	506.18	core	Troctolite	38.9203			0.030671			0.338151	43.139	18.0654		0.067662	100.561
Ol	735B_89R2_9	1119	506.18	core	Troctolite	38.9005			0.046398			0.285286	42.8373	17.722		0.101785	99.8933
Ol	735B_83R7_5	907	461.33	rim	Troctolite	38.7137			0.026615			0.269723	43.2846	17.1735		0.229074	99.6972
Ol	735B_83R7_5	914	461.33	rim	Troctolite	38.5495			0.006276			0.191954	42.652	17.8029		0.047171	99.2498
Ol	735B_83R7_5	921	461.33	rim	Troctolite	39.2574			0.04172			0.249614	42.5482	18.0058		0.162812	100.266
Ol	735B_83R7_5	933	461.33	rim	Troctolite	38.9634			0.015069			0.263316	43.2651	17.2857		0.113642	99.9062
Ol	735B_83R8_7	944	462.84	rim	Troctolite	39.2047			0.061768			0.193615	44.7402	15.044		0.186082	99.4304
Ol	735B_83R8_7	953	462.84	rim	Troctolite	39.5017			0.051901			0.178711	44.2947	15.6064		0.205394	99.8388
Ol	735B_83R8_7	963	462.84	rim	Troctolite	39.1397			0.057253			0.232129	43.9237	15.4775		0.164133	98.9944
Ol	735B_89R2_9	1114	506.18	rim	Troctolite	38.7358			0.022843			0.288606	42.7814	17.934		0.145041	99.9078
Ol	735B_89R2_9	1124	506.18	rim	Troctolite	30.7048			0.246069			0.193024	33.8869	16.7349		0.10466	81.8705
Mineral	Sample	Point	Depth (mbsf)	Grain area	Lithology	SiO2	Al2O3	TiO2	CaO	Na2O	K2O	MnO	MgO	FeO	Cr2O3	NiO	Total
					2 sigma	0.544667	0.629333		0.308667	0.343333	0.0673333		0.03	0.0393333
Pl	Counting time (s) - per element					10	10		10	10	10		10	20
Pl	735B_85R7_79	1 / 1 .	480.683	core	Gabbro	50.7638	31.4421		13.973	3.7283	0.0283		0.0176	0.1201			100.073
Pl	735B_85R7_79	3 / 1 .	480.683	core	Gabbro	51.4376	31.1601		13.815	3.9422	0.0161		0.037	0.0939			100.502
Pl	735B_85R7_79	4 / 1 .	480.683	core	Gabbro	50.1079	32.0748		14.897	3.004	0.0013		0.022	0.1303			100.237
Pl	735B_85R7_79	6 / 1 .	480.683	core	Gabbro	50.0716	32.2106		14.9344	3.1441	0.0256		0.0124	0.1319			100.531
Pl	735B_85R7_79	9 / 1 .	480.694	core	Gabbro	51.5045	31.2454		14.0295	3.6892	0.0013		0.0141	0.0886			100.573
Pl	735B_85R7_79	11 / 1 .	480.694	core	Gabbro	51.963	30.8662		13.5214	3.9454	0.0013		0.0026	0.0865			100.386
Pl	735B_85R7_79	13 / 1 .	480.694	core	Gabbro	50.1385	31.798		14.5219	3.254	0.0444		0.0325	0.1293			99.9186
Pl	735B_85R7_79	24 / 1 .	480.691	core	Gabbro	51.3155	31.5325		14.3358	3.6084	0.0108		0.0053	0.107			100.915
Pl	735B_85R7_79	26 / 1 .	480.691	core	Gabbro	51.6432	31.0883		13.6214	4.0148	0.004		0.0274	0.0668			100.466
Pl	735B_85R7_79	28 / 1 .	480.695	core	Gabbro	53.8201	29.4983		11.8251	4.6945	0.0407		0.0018	0.0613			99.9418
Pl	735B_85R7_79	35 / 1 .	480.698	core	Gabbro	51.7947	30.8513		13.4456	4.0131	0		0.0202	0.1104			100.235
Pl	735B_85R7_79	36 / 1 .	480.698	core	Gabbro	51.1954	31.228		13.954	3.6261	0.004		0.0194	0.074			100.101
Pl	735B_85R7_79	38 / 1 .	480.703	core	Gabbro	51.3129	31.2969		14.0097	3.8828	0.0509		0.0114	0.0735			100.638
Pl	735B_85R7_79	39 / 1 .	480.703	core	Gabbro	48.3643	33.0039		16.5478	2.4925	0.0147		0.0097	0.1756			100.609
Pl	735B_85R7_79	42 / 1 .	480.703	core	Gabbro	51.4974	31.1235		13.6831	3.7851	0.0674		0.0273	0.0753			100.259
Pl	735B_85R7_79	47 / 1 .	480.705	core	Gabbro	52.0125	30.8554		13.5331	3.8867	0.0284		0.0194	0.0585			100.394
Pl	735B_85R7_79	50 / 1 .	480.705	core	Gabbro	51.596	31.0344		13.6869	3.9141	0.027		0.0185	0.1231			100.4
Pl	735B_85R7_79	52 / 1 .	480.704	core	Gabbro	52.0673	30.4215		13.201	4.1883	0.0432		0.0283	0.0914			100.041
Pl	735B_85R7_79	59 / 1 .	480.709	core	Gabbro	50.7531	31.5179		14.2355	3.4207	0		0.0706	0.1275			100.125
Pl	735B_85R7_79	60 / 1 .	480.709	core	Gabbro	51.4367	31.1761		13.9372	3.7398	0.0175		0	0.0767			100.384
Pl	735B_85R7_79	63 / 1 .	480.711	core	Gabbro	49.8526	32.2416		14.9673	2.9777	0		0.0009	0.1232			100.163
Pl	735B_85R7_79	2 / 1 .	480.683	rim	Gabbro	51.3442	31.278		13.796	3.7685	0.0081		0	0.0839			100.279
Pl	735B_85R7_79	12 / 1 .	480.694	rim	Gabbro	50.9546	31.8242		14.3519	3.3919	0.0094		0	0.1075			100.64
Pl	735B_85R7_79	25 / 1 .	480.691	rim	Gabbro	51.3158	31.4806		14.02	3.7257	0.0054		0.03	0.0949			100.672
Pl	735B_85R7_79	37 / 1 .	480.698	rim	Gabbro	50.8526	31.3141		14.4897	3.4346	0.0094		0.0406	0.1289			100.27
Pl	735B_85R7_79	43 / 1 .	480.703	rim	Gabbro	51.5012	31.1158		13.8138	3.7262	0.0404		0.0123	0.0549			100.265
Pl	735B_85R7_79	48 / 1 .	480.705	rim	Gabbro	51.1177	31.54		14.4198	3.3783	0.0188		0.0317	0.0556			100.562
Pl	735B_85R7_79	49 / 1 .	480.705	rim	Gabbro	51.6531	31.1191		13.8663	3.7953	0.0189		0	0.0619			100.515
Pl	735B_85R7_79	51 / 1 .	480.704	rim	Gabbro	51.698	30.8407		13.6542	3.9159	0.0175		0.0106	0.1041			100.241
Pl	735B_85R7_79	54 / 1 .	480.704	rim	Gabbro	48.9303	32.3904		15.5436	2.7671	0.0013		0	0.1248			99.7575
Pl	735B_85R7_79	61 / 1 .	480.711	rim	Gabbro	50.8051	31.4865		14.024	3.6812	0		0.0124	0.076			100.085
Pl	735B_56R4_61A	5 / 1 .	274.885	core	Ol-bearing gabbro	56.9849	27.5264		9.8076	6.0195	0.0645		0.0078	0.1995			100.61
Pl	735B_56R4_61A	7 / 1 .	274.885	core	Ol-bearing gabbro	57.8687	27.1263		9.3455	6.1739	0.0831		0	0.2269			100.824
Pl	735B_56R4_61A	8 / 1 .	274.885	core	Ol-bearing gabbro	57.0062	27.1623		9.2586	5.9975	0.1052		0	0.1711			99.7009
Pl	735B_56R4_61A	9 / 1 .	274.885	core	Ol-bearing gabbro	57.5775	27.3703		9.6621	6.2504	0.083		0.0314	0.2582			101.233
Pl	735B_56R4_61A	13 / 1 .	274.892	core	Ol-bearing gabbro	57.0663	27.0992		9.349	6.0901	0.0914		0.009	0.219			99.924
Pl	735B_56R4_61A	15 / 1 .	274.892	core	Ol-bearing gabbro	57.3681	27.1711		9.2307	6.0665	0.1054		0.0279	0.1835			100.153
Pl	735B_56R4_61A	16 / 1 .	274.892	core	Ol-bearing gabbro	56.6857	27.3344		9.7628	5.9321	0.0859		0.0171	0.1499			99.9679
Pl	735B_56R4_61A	33 / 1 .	274.899	core	Ol-bearing gabbro	57.1551	27.2918		9.5425	6.1456	0.0692		0.0162	0.2971			100.517
Pl	735B_56R4_61A	35 / 1 .	274.899	core	Ol-bearing gabbro	56.8953	27.3552		9.536	6.1049	0.0722		0.0216	0.1652			100.15
Pl	735B_56R4_61A	39 / 1 .	274.901	core	Ol-bearing gabbro	57.5443	27.072		9.1681	6.1946	0.071		0.0217	0.2124			100.284
Pl	735B_56R4_61A	41 / 1 .	274.904	core	Ol-bearing gabbro	57.0282	27.2627		9.5295	5.9051	0.0995		0.0331	0.2072			100.065
Pl	735B_56R4_61A	44 / 1 .	274.904	core	Ol-bearing gabbro	57.267	27.1542		9.5088	6.0732	0.1324		0.0295	0.1625			100.328
Pl	735B_56R4_61A	45 / 1 .	274.904	core	Ol-bearing gabbro	57.4159	27.2455		9.5444	6.1466	0.0818		0	0.172			100.606
Pl	735B_56R4_61A	49 / 1 .	274.903	core	Ol-bearing gabbro	57.6916	27.1585		9.2767	6.2581	0.0655		0	0.1126			100.563
Pl	735B_56R4_61A	50 / 1 .	274.903	core	Ol-bearing gabbro	57.5072	27.2671		9.3608	6.2577	0.0948		0	0.1746			100.662
Pl	735B_56R4_61A	51 / 1 .	274.903	core	Ol-bearing gabbro	57.0922	27.2352		9.308	6.0756	0.0817		0.0052	0.2381			100.036
Pl	735B_56R4_61A	61 / 1 .	274.906	core	Ol-bearing gabbro	57.3824	26.9924		9.0859	6.324	0.1112		0.0252	0.1853			100.106
Pl	735B_56R4_61A	70 / 1 .	274.904	core	Ol-bearing gabbro	56.9212	27.377		9.2943	6.0134	0.1136		0.0314	0.1991			99.95
Pl	735B_56R4_61A	71 / 1 .	274.904	core	Ol-bearing gabbro	57.108	26.9982		9.2898	5.9087	0.0984		0.0206	0.1418			99.5655
Pl	735B_56R4_61A	74 / 1 .	274.904	core	Ol-bearing gabbro	57.239	26.9213		9.2993	6.1441	0.0582		0.0269	0.1905			99.8793
Pl	735B_56R4_61B	66 / 1 .	274.88	core	Ol-bearing gabbro	63.47	22.92		4.17	9.06	0.44		0.01	0.11			100.18
Pl	735B_56R4_61B	67 / 1 .	274.88	core	Ol-bearing gabbro	66.11	21.49		2.19	10.43	0.04		0	0.05			100.32
Pl	735B_56R4_61B	68 / 1 .	274.88	core	Ol-bearing gabbro	56.02	27.57		9.62	6.32	0.22		0.02	0.11			99.89
Pl	735B_56R4_61B	69 / 1 .	274.88	core	Ol-bearing gabbro	62.32	22.79		4.07	9.01	0.32		0.03	0.28			98.82
Pl	735B_56R4_61B	70 / 1 .	274.88	core	Ol-bearing gabbro	66.19	21.62		2.15	10.68	0.03		0.01	0.12			100.81
Pl	735B_56R4_61B	71 / 1 .	274.88	core	Ol-bearing gabbro	66.4	21.31		2.19	10.5	0.1		0	0.14			100.64
Pl	735B_56R4_61B	74 / 1 .	274.88	core	Ol-bearing gabbro	64.6	22.61		3.34	9.9	0.08		0	0.15			100.76
Pl	735B_56R4_61B	88 / 1 .	274.88	core	Ol-bearing gabbro	55.79	27.58		9.56	6.35	0.08		0.03	0.21			99.66
Pl	735B_56R4_61B	91 / 1 .	274.88	core	Ol-bearing gabbro	56.32	27.48		9.47	6.52	0.11		0.07	0.35			100.43
Pl	735B_56R4_61B	94 / 1 .	274.88	core	Ol-bearing gabbro	62.71	22.84		4.27	9.12	0.22		0.02	0.13			99.33
Pl	735B_56R4_61B	95 / 1 .	274.88	core	Ol-bearing gabbro	56.83	27.57		9.49	6.45	0.14		0.02	0.08			100.65
Pl	735B_56R4_61B	98 / 1 .	274.88	core	Ol-bearing gabbro	56.75	27.22		9.36	6.47	0.23		0	0.09			100.28
Pl	735B_56R4_61B	99 / 1 .	274.88	core	Ol-bearing gabbro	63.28	22.57		3.6	10.01	0.04		0.03	0.04			99.57
Pl	735B_56R4_61B	100 / 1 .	274.88	core	Ol-bearing gabbro	63.05	22.96		4.04	9.22	0.48		0.01	0.21			100.02
Pl	735B_56R4_61A	6 / 1 .	274.885	rim	Ol-bearing gabbro	56.8174	28.0575		9.7151	6.0496	0.047		0	0.2147			100.901
Pl	735B_56R4_61A	10 / 1 .	274.885	rim	Ol-bearing gabbro	57.0632	27.7349		9.59	6.03	0.0291		0.0162	0.1842			100.648
Pl	735B_56R4_61A	14 / 1 .	274.892	rim	Ol-bearing gabbro	57.267	27.4704		9.5966	5.9614	0.1054		0.0045	0.2201			100.625
Pl	735B_56R4_61A	17 / 1 .	274.892	rim	Ol-bearing gabbro	57.2994	27.3084		9.3902	6.2984	0.0641		0.0036	0.1817			100.546
Pl	735B_56R4_61A	34 / 1 .	274.899	rim	Ol-bearing gabbro	57.0396	26.9678		9.4015	6.1296	0.0696		0.0122	0.1813			99.8016
Pl	735B_56R4_61A	36 / 1 .	274.901	rim	Ol-bearing gabbro	57.3262	27.4424		9.3435	6.1331	0.0468		0	0.1826			100.475
Pl	735B_56R4_61A	38 / 1 .	274.901	rim	Ol-bearing gabbro	56.8209	27.2441		9.3824	6.2961	0.0845		0.0018	0.2248			100.055
Pl	735B_56R4_61A	42 / 1 .	274.904	rim	Ol-bearing gabbro	57.1497	27.5318		9.6268	5.995	0.0733		0.0341	0.1868			100.598
Pl	735B_56R4_61A	43 / 1 .	274.904	rim	Ol-bearing gabbro	56.9526	27.3907		9.7118	5.9944	0.0348		0.0295	0.1682			100.282
Pl	735B_56R4_61A	46 / 1 .	274.904	rim	Ol-bearing gabbro	57.371	27.4519		9.5424	6.0043	0.1166		0.0156	0.1975			100.699
Pl	735B_56R4_61A	48 / 1 .	274.903	rim	Ol-bearing gabbro	56.7441	27.5261		9.6285	6.1058	0.0549		0	0.2062			100.266
Pl	735B_56R4_61A	62 / 1 .	274.906	rim	Ol-bearing gabbro	57.2504	27.3872		9.6072	6.2063	0.0887		0.0279	0.1965			100.764
Pl	735B_56R4_61A	63 / 1 .	274.906	rim	Ol-bearing gabbro	57.0576	27.3094		9.313	6.1455	0.0665		0.0386	0.149			100.08
Pl	735B_56R4_61A	69 / 1 .	274.904	rim	Ol-bearing gabbro	56.8682	27.6145		9.7758	5.9431	0.0831		0.0242	0.2027			100.512
Pl	735B_56R4_61A	72 / 1 .	274.904	rim	Ol-bearing gabbro	56.468	27.3612		9.6311	6.201	0.05		0.0135	0.2197			99.9445
Pl	735B_56R4_61A	73 / 1 .	274.904	rim	Ol-bearing gabbro	57.4295	26.6666		9.0454	6.3585	0.043		0.0225	0.144			99.7095
Pl	735B_56R4_61A	75 / 1 .	274.904	rim	Ol-bearing gabbro	56.6926	27.5189		9.3155	6.1255	0.0653		0.0144	0.1414			99.8736
Pl	735B_57R1_73	2 / 1 .	275.736	core	Ol-gabbro	62.5242	23.2003		4.6863	8.4743	0.5215		0.0018	0.1971			99.6055
Pl	735B_57R1_73	3 / 1 .	275.736	core	Ol-gabbro	56.3454	27.187		9.5964	6.109	0.1826		0	0.1616			99.582
Pl	735B_57R1_73	5 / 1 .	275.736	core	Ol-gabbro	56.7164	26.9547		9.2099	6.1605	0.1082		0.0302	0.2266			99.4065
Pl	735B_57R1_73	7 / 1 .	275.736	core	Ol-gabbro	56.6969	27.1065		9.3798	6.1898	0.077		0	0.1397			99.5897
Pl	735B_57R1_73	20 / 1 .	275.737	core	Ol-gabbro	56.8365	27.2164		9.3012	6.3482	0.1686		0	0.0957			99.9666
Pl	735B_57R1_73	21 / 1 .	275.737	core	Ol-gabbro	63.6675	23.0326		4.3133	8.9112	0.2829		0.0054	0.1133			100.326
Pl	735B_57R1_73	22 / 1 .	275.737	core	Ol-gabbro	63.1645	23.3081		4.6147	8.7577	0.4785		0	0.1443			100.468
Pl	735B_57R1_73	24 / 1 .	275.739	core	Ol-gabbro	56.6452	27.501		9.701	6.0737	0.1108		0.0142	0.0881			100.134
Pl	735B_57R1_73	25 / 1 .	275.739	core	Ol-gabbro	56.7733	27.1073		9.34	6.2534	0.0743		0.0062	0.1963			99.7508
Pl	735B_57R1_73	38 / 1 .	275.745	core	Ol-gabbro	56.5476	26.7639		9.2381	6.3697	0.131		0.0249	0.1907			99.2659
Pl	735B_57R1_73	39 / 1 .	275.745	core	Ol-gabbro	62.8212	23.2435		4.496	8.7614	0.2227		0	0.1532			99.698
Pl	735B_57R1_73	40 / 1 .	275.745	core	Ol-gabbro	56.7209	27.2257		9.4177	6.156	0.2001		0.0035	0.137			99.8609
Pl	735B_57R1_73	42 / 1 .	275.745	core	Ol-gabbro	56.719	26.9706		9.2485	6.1653	0.134		0	0.1266			99.364
Pl	735B_57R1_73	44 / 1 .	275.745	core	Ol-gabbro	63.2339	23.4016		4.5977	8.868	0.2622		0.0126	0.1385			100.514
Pl	735B_57R1_73	51 / 1 .	275.745	core	Ol-gabbro	56.4182	27.0436		9.4043	6.2301	0.1715		0.0071	0.271			99.5458
Pl	735B_57R1_73	52 / 1 .	275.745	core	Ol-gabbro	56.9026	27.1795		9.3174	6.2531	0.1517		0.0169	0.1233			99.9445
Pl	735B_57R1_73	59 / 1 .	275.745	core	Ol-gabbro	56.9005	27.1024		9.0706	6.1569	0.1529		0	0.1997			99.583
Pl	735B_57R1_73	67 / 1 .	275.761	core	Ol-gabbro	56.6952	27.4291		9.3598	6.13	0.1936		0	0.175			99.9827
Pl	735B_57R1_73	71 / 1 .	275.761	core	Ol-gabbro	56.9563	27.2845		9.3021	6.3913	0.1112		0.0196	0.0835			100.148
Pl	735B_58R3_108A	80 / 1 .	284.345	core	Ol-gabbro	55.6698	27.5235		9.9986	5.7809	0.0895		0.0027	0.2536			99.3186
Pl	735B_58R3_108A	82 / 1 .	284.345	core	Ol-gabbro	55.5776	27.511		10.1775	5.9248	0.0675		0.0142	0.2258			99.4984
Pl	735B_58R3_108A	84 / 1 .	284.345	core	Ol-gabbro	54.9144	27.9942		10.8309	5.4961	0.1105		0.0142	0.2279			99.5882
Pl	735B_58R3_108A	87 / 1 .	284.349	core	Ol-gabbro	55.5692	27.4637		10.1651	5.8081	0.0848		0.0212	0.2035			99.3156
Pl	735B_58R3_108A	99 / 1 .	284.342	core	Ol-gabbro	55.3639	28.2336		10.6013	5.4978	0.0352		0.0177	0.223			99.9725
Pl	735B_58R3_108A	102 / 1 .	284.342	core	Ol-gabbro	52.6622	29.8135		12.6325	4.5414	0.0658		0	0.2522			99.9676
Pl	735B_58R3_108A	105 / 1 .	284.344	core	Ol-gabbro	52.7693	29.4618		12.7302	4.5364	0.0793		0.0229	0.2581			99.858
Pl	735B_58R3_108A	107 / 1 .	284.35	core	Ol-gabbro	55.2653	27.5392		10.2815	5.5529	0.0919		0.0647	0.2675			99.063
Pl	735B_58R3_108A	109 / 1 .	284.35	core	Ol-gabbro	54.1173	28.4821		11.5983	4.9647	0.0769		0.0514	0.2265			99.5172
Pl	735B_58R3_108A	111 / 1 .	284.351	core	Ol-gabbro	52.8576	29.4712		12.8465	4.3049	0.0605		0.0688	0.3884			99.9979
Pl	735B_58R3_108A	113 / 1 .	284.353	core	Ol-gabbro	52.5918	29.3299		12.6641	4.3178	0.0631		0.0423	0.3292			99.3382
Pl	735B_58R3_108A	126 / 1 .	284.351	core	Ol-gabbro	56.0584	27.185		9.9506	5.6765	0.1035		0.0518	0.2969			99.3227
Pl	735B_58R3_108A	128 / 1 .	284.346	core	Ol-gabbro	54.2455	28.4903		11.558	5.1077	0.0853		0.0347	0.2265			99.748
Pl	735B_58R3_108A	130 / 1 .	284.346	core	Ol-gabbro	55.3183	28.0548		10.7501	5.4692	0.0905		0.0346	0.2619			99.9794
Pl	735B_58R3_108A	138 / 1 .	284.34	core	Ol-gabbro	54.1812	28.2434		10.9705	5.1844	0.0938		0.0321	0.3033			99.0087
Pl	735B_58R3_108A	139 / 1 .	284.34	core	Ol-gabbro	54.9849	28.0604		11.0768	5.1836	0.0865		0.0479	0.272			99.7121
Pl	735B_58R3_108A	140 / 1 .	284.339	core	Ol-gabbro	53.2363	28.8731		11.9293	4.7537	0.0866		0.016	0.3006			99.1956
Pl	735B_58R3_108A	147 / 1 .	284.331	core	Ol-gabbro	53.8246	28.8453		11.8143	4.9013	0.062		0.0513	0.3004			99.7992
Pl	735B_60R4_115B	76 / 1 .	295.385	core	Ol-gabbro	53.3332	29.5115		12.2394	4.4837	0.0385		0.0454	0.3032			99.9549
Pl	735B_60R4_115B	86 / 1 .	295.383	core	Ol-gabbro	52.2272	29.7377		12.9195	4.4087	0.0757		0.0653	0.2861			99.7202
Pl	735B_60R4_115B	87 / 1 .	295.383	core	Ol-gabbro	52.4154	29.9613		12.4861	4.3874	0.0636		0.0412	0.2572			99.6122
Pl	735B_60R4_115B	100 / 1 .	295.397	core	Ol-gabbro	52.6852	29.9056		12.678	4.5304	0.0212		0.0112	0.2443			100.076
Pl	735B_60R4_115B	102 / 1 .	295.397	core	Ol-gabbro	53.1322	29.8256		12.6446	4.351	0.0398		0	0.2257			100.219
Pl	735B_60R4_115B	104 / 1 .	295.395	core	Ol-gabbro	52.596	29.8663		13.0325	4.2282	0.0701		0.0472	0.3566			100.197
Pl	735B_60R4_115B	108 / 1 .	295.391	core	Ol-gabbro	54.191	28.511		11.1801	5.1073	0.0798		0.0436	0.3124			99.4252
Pl	735B_60R4_115B	111 / 1 .	295.391	core	Ol-gabbro	52.5419	29.845		12.8619	4.0927	0.0434		0.0324	0.3627			99.78
Pl	735B_60R4_115B	112 / 1 .	295.391	core	Ol-gabbro	52.1951	29.5544		12.9396	4.0832	0.0179		0.041	0.3948			99.226
Pl	735B_60R4_115B	8 / 1 .	295.387	core	Ol-gabbro	52.6172	29.7589		12.8035	4.3898	0.0332		0.0224	0.338			99.963
Pl	735B_60R4_115B	10 / 1 .	295.384	core	Ol-gabbro	52.4553	29.8781		12.8655	4.2779	0.055		0.0543	0.3685			99.9546
Pl	735B_60R4_115B	15 / 1 .	295.382	core	Ol-gabbro	55.1757	28.5372		10.6847	5.4068	0.0956		0.017	0.2155			100.132
Pl	735B_60R4_115B	18 / 1 .	295.382	core	Ol-gabbro	55.3046	28.3375		10.927	5.2741	0.0759		0.0241	0.2205			100.164
Pl	735B_60R4_115B	26 / 1 .	295.388	core	Ol-gabbro	54.1694	28.8245		11.4781	5.0597	0.0578		0.0214	0.3318			99.9427
Pl	735B_60R4_115B	30 / 1 .	295.388	core	Ol-gabbro	52.8703	29.6578		12.5492	4.2045	0.033		0.0382	0.3056			99.6586
Pl	735B_60R4_115B	39 / 1 .	295.386	core	Ol-gabbro	53.8433	29.4766		11.7743	4.7979	0.0275		0.0196	0.2496			100.189
Pl	735B_60R4_115B	42 / 1 .	295.386	core	Ol-gabbro	52.9233	29.8847		12.7332	4.4539	0.0372		0.0071	0.2873			100.327
Pl	735B_68R2_10.5A	26 / 1 .	336.541	core	Ol-gabbro	52.4123	30.0303		13.0985	4.1665	0.0325		0.0518	0.2255			100.086
Pl	735B_68R2_10.5A	27 / 1 .	336.541	core	Ol-gabbro	53.1465	29.8181		12.5388	4.4297	0.0393		0.0361	0.2852			100.358
Pl	735B_68R2_10.5A	29 / 1 .	336.541	core	Ol-gabbro	53.302	29.5274		12.4301	4.4594	0.069		0.0257	0.2506			100.064
Pl	735B_68R2_10.5A	34 / 1 .	336.535	core	Ol-gabbro	54.0706	29.2645		11.972	4.6923	0.038		0.0338	0.1876			100.259
Pl	735B_68R2_10.5A	36 / 1 .	336.535	core	Ol-gabbro	53.2287	29.446		12.3505	4.5008	0.0487		0.0284	0.244			99.8471
Pl	735B_68R2_10.5A	37 / 1 .	336.535	core	Ol-gabbro	48.6812	32.5307		15.9691	2.5897	0.0282		0.0379	0.2403			100.077
Pl	735B_68R2_10.5A	41 / 1 .	336.533	core	Ol-gabbro	52.2508	30.1468		13.1777	4.0674	0.0528		0.0169	0.2463			99.9587
Pl	735B_68R2_10.5A	42 / 1 .	336.537	core	Ol-gabbro	51.8621	30.3284		13.7552	3.9627	0.0337		0.023	0.3124			100.277
Pl	735B_68R2_10.5A	55 / 1 .	336.547	core	Ol-gabbro	52.439	30.3467		13.056	4.3098	0.05		0.0523	0.2605			100.514
Pl	735B_68R2_10.5A	58 / 1 .	336.547	core	Ol-gabbro	52.4723	30.1352		13.1786	4.1474	0.0487		0.0115	0.2467			100.24
Pl	735B_68R2_10.5A	59 / 1 .	336.546	core	Ol-gabbro	52.817	30.046		12.8035	4.1955	0.0773		0.0027	0.2104			100.152
Pl	735B_68R2_10.5A	62 / 1 .	336.546	core	Ol-gabbro	52.3526	30.2118		12.9625	4.1652	0.0189		0.0337	0.2826			100.027
Pl	735B_68R2_10.5A	72 / 1 .	336.535	core	Ol-gabbro	52.7096	30.1441		13.0208	4.279	0.0595		0.0452	0.2591			100.517
Pl	735B_68R2_10.5A	75 / 1 .	336.535	core	Ol-gabbro	52.8719	30.0451		12.331	4.4589	0.0487		0.0461	0.2619			100.064
Pl	735B_73R5_9	18 / 1 .	371.123	core	Ol-gabbro	51.6987	30.048		13.0023	4.0478	0.0513		0.0672	0.1653			99.0806
Pl	735B_73R5_9	35 / 1 .	371.132	core	Ol-gabbro	52.661	29.7551		12.7026	4.3462	0.0216		0.0523	0.1823			99.7211
Pl	735B_73R5_9	39 / 1 .	371.135	core	Ol-gabbro	51.8613	29.9874		12.9234	4.2437	0.0297		0.0505	0.1942			99.2902
Pl	735B_73R5_9	45 / 1 .	371.137	core	Ol-gabbro	51.8536	30.2355		13.1453	4.1544	0.0469		0.0317	0.1866			99.654
Pl	735B_73R5_9	48 / 1 .	371.137	core	Ol-gabbro	52.191	30.2758		13.1896	3.9748	0.0351		0.0416	0.2097			99.9176
Pl	735B_73R5_9	57 / 1 .	371.145	core	Ol-gabbro	52.8607	29.9144		12.7109	4.3205	0.0309		0.0088	0.1427			99.9889
Pl	735B_73R5_9	59 / 1 .	371.145	core	Ol-gabbro	52.5838	29.7539		12.4516	4.4393	0.0271		0.0275	0.1622			99.4454
Pl	735B_73R5_9	61 / 1 .	371.145	core	Ol-gabbro	53.5371	29.2138		11.7982	4.7817	0.0646		0.0335	0.1811			99.61
Pl	735B_73R5_9	67 / 1 .	371.15	core	Ol-gabbro	52.6789	29.8333		12.6936	4.2785	0.0672		0.0141	0.1658			99.7314
Pl	735B_73R5_9	68 / 1 .	371.15	core	Ol-gabbro	52.4778	30.0297		12.9647	4.4036	0.0538		0.0414	0.1589			100.13
Pl	735B_75R5_27	1 / 1 .	390.357	core	Ol-gabbro	53.4265	29.5218		12.1126	4.5237	0.0704		0.0134	0.1565			99.8249
Pl	735B_75R5_27	22 / 1 .	390.353	core	Ol-gabbro	52.6445	29.9938		12.8122	4.3628	0.0618		0.0045	0.2146			100.094
Pl	735B_75R5_27	24 / 1 .	390.353	core	Ol-gabbro	52.4939	30.0695		12.8757	4.175	0.0481		0.0107	0.1289			99.8018
Pl	735B_75R5_27	38 / 1 .	390.353	core	Ol-gabbro	52.5957	29.6524		12.8575	4.2646	0.0508		0.0419	0.1903			99.6532
Pl	735B_75R5_27	39 / 1 .	390.353	core	Ol-gabbro	52.0906	30.1736		12.9967	4.2675	0.055		0.0428	0.2055			99.8317
Pl	735B_75R5_27	45 / 1 .	390.351	core	Ol-gabbro	52.5516	30.0754		12.8967	4.2713	0.0767		0.0222	0.2219			100.116
Pl	735B_75R5_27	46 / 1 .	390.351	core	Ol-gabbro	54.3968	28.8115		11.4525	5.0132	0.1386		0	0.1404			99.953
Pl	735B_75R5_27	53 / 1 .	390.347	core	Ol-gabbro	52.6666	29.9505		12.9414	4.187	0.066		0.024	0.1854			100.021
Pl	735B_75R5_27	56 / 1 .	390.347	core	Ol-gabbro	52.7169	29.7881		12.8792	4.3338	0.0439		0.0116	0.1852			99.9587
Pl	735B_75R5_27	70 / 1 .	390.342	core	Ol-gabbro	52.3172	29.8506		12.8124	4.42	0.0658		0.0516	0.1892			99.7068
Pl	735B_75R5_27	71 / 1 .	390.342	core	Ol-gabbro	52.962	30.0036		12.6875	4.1623	0.0413		0.0329	0.1783			100.068
Pl	735B_75R5_27	74 / 1 .	390.342	core	Ol-gabbro	52.4107	30.1802		13.1589	4.1947	0.0522		0.0338	0.226			100.257
Pl	735B_75R5_27	79 / 1 .	390.337	core	Ol-gabbro	53.1205	29.7742		12.5663	4.3436	0.0601		0.0504	0.1762			100.091
Pl	735B_75R5_27	80 / 1 .	390.337	core	Ol-gabbro	53.0078	29.9195		12.6147	4.4662	0.0302		0.0436	0.2227			100.305
Pl	735B_75R5_27	81 / 1 .	390.337	core	Ol-gabbro	52.8604	29.9224		12.6865	4.5535	0.0536		0.0651	0.2769			100.418
Pl	735B_75R5_27	93 / 1 .	390.336	core	Ol-gabbro	53.0564	29.6279		12.5336	4.4704	0.0355		0	0.1564			99.8802
Pl	735B_75R5_27	94 / 1 .	390.336	core	Ol-gabbro	53.1687	29.7443		12.54	4.4939	0.0355		0.008	0.2377			100.228
Pl	735B_75R5_27	95 / 1 .	390.336	core	Ol-gabbro	53.145	29.7774		12.5938	4.2745	0.0248		0.0045	0.1822			100.002
Pl	735B_75R5_27	98 / 1 .	390.336	core	Ol-gabbro	53.1329	29.7538		12.7919	4.2993	0.0588		0.0035	0.1964			100.237
Pl	735B_75R5_27	108 / 1 .	390.347	core	Ol-gabbro	52.4092	30.2249		13.0066	4.1532	0.0041		0.0187	0.1458			99.9625
Pl	735B_75R5_27	111 / 1 .	390.347	core	Ol-gabbro	52.4523	30.2327		13.0542	4.1964	0.0383		0	0.1704			100.144
Pl	735B_75R5_27	112 / 1 .	390.344	core	Ol-gabbro	52.7156	29.8922		12.9174	4.358	0.0591		0.008	0.1417			100.092
Pl	735B_75R5_27	114 / 1 .	390.344	core	Ol-gabbro	52.5161	30.2963		12.9402	4.0937	0.0523		0.0677	0.2056			100.172
Pl	735B_75R5_27	122 / 1 .	390.341	core	Ol-gabbro	52.3659	29.9778		12.755	4.3575	0.0495		0.025	0.2412			99.7719
Pl	735B_75R5_27	123 / 1 .	390.341	core	Ol-gabbro	52.4871	29.8796		12.7485	4.1949	0.0467		0.0275	0.1708			99.5551
Pl	735B_69R3_52B	10 / 1 .	344.129	core	Ol-gabbro	53.7681	29.6073		12.4154	4.5796	0.0545		0.0154	0.2013			100.642
Pl	735B_69R3_52B	12 / 1 .	344.129	core	Ol-gabbro	52.4412	30.546		13.0066	4.0845	0.0446		0.0333	0.2846			100.441
Pl	735B_69R3_52B	21 / 1 .	344.13	core	Ol-gabbro	52.8488	30.2585		12.7984	4.2121	0.0321		0.0243	0.1938			100.368
Pl	735B_69R3_52B	24 / 1 .	344.13	core	Ol-gabbro	53.0294	30.004		13.1155	4.2846	0.0344		0.0321	0.2559			100.756
Pl	735B_69R3_52B	29 / 1 .	344.13	core	Ol-gabbro	50.6307	31.3307		14.6126	3.586	0.0315		0.0071	0.2368			100.435
Pl	735B_69R3_52B	31 / 1 .	344.13	core	Ol-gabbro	52.9726	30.0906		12.7293	4.1861	0.0386		0.0338	0.2015			100.252
Pl	735B_69R3_52B	39 / 1 .	344.136	core	Ol-gabbro	52.4839	29.9778		12.6008	4.2833	0.0119		0.0231	0.2119			99.5927
Pl	735B_69R3_52B	41 / 1 .	344.136	core	Ol-gabbro	53.1914	30.1697		12.7856	4.2721	0.0498		0.0375	0.2282			100.734
Pl	735B_69R3_52B	44 / 1 .	344.136	core	Ol-gabbro	52.7357	30.4697		13.146	4.287	0.0456		0.025	0.249			100.958
Pl	735B_69R3_52B	61 / 1 .	344.141	core	Ol-gabbro	53.0033	29.8704		12.6012	4.5656	0.062		0.0026	0.2209			100.326
Pl	735B_69R3_52B	64 / 1 .	344.141	core	Ol-gabbro	52.8645	30.3158		13.1663	4.2543	0.0359		0.0313	0.2433			100.911
Pl	735B_69R3_52B	71 / 1 .	344.135	core	Ol-gabbro	52.8425	30.1776		12.8543	4.1869	0.0371		0.0213	0.2593			100.379
Pl	735B_69R3_52B	72 / 1 .	344.135	core	Ol-gabbro	52.3077	30.3484		13.3479	4.0687	0.0432		0.0234	0.2634			100.403
Pl	735B_69R3_52B	75 / 1 .	344.135	core	Ol-gabbro	53.3551	29.7329		12.3416	4.6115	0.0496		0.0303	0.2212			100.342
Pl	735B_69R3_52B	81 / 1 .	344.137	core	Ol-gabbro	52.5119	30.4537		13.0815	4.0816	0.0403		0.0368	0.267			100.473
Pl	735B_69R3_52B	82 / 1 .	344.137	core	Ol-gabbro	53.6588	29.5784		12.1068	4.5452	0.074		0.0397	0.2467			100.25
Pl	735B_69R3_52B	85 / 1 .	344.129	core	Ol-gabbro	52.1634	30.214		13.1866	4.2234	0.0403		0.0459	0.2761			100.15
Pl	735B_69R3_52B	90 / 1 .	344.126	core	Ol-gabbro	52.5361	29.8842		13.0295	4.1695	0.0611		0.0404	0.3068			100.028
Pl	735B_69R3_52B	93 / 1 .	344.127	core	Ol-gabbro	52.912	30.0711		13.0467	4.4116	0.0625		0.0108	0.1998			100.715
Pl	735B_69R3_52B	95 / 1 .	344.127	core	Ol-gabbro	54.0233	29.1858		11.7266	4.8106	0.0252		0.0099	0.1989			99.9803
Pl	735B_57R1_73	6 / 1 .	275.736	rim	Ol-gabbro	56.5145	27.2455		9.5011	6.2985	0.0487		0	0.2587			99.867
Pl	735B_57R1_73	23 / 1 .	275.739	rim	Ol-gabbro	57.4129	27.22		9.4318	6.1658	0.0932		0	0.1767			100.5
Pl	735B_57R1_73	26 / 1 .	275.739	rim	Ol-gabbro	56.6884	27.0548		9.3884	6.3763	0.0675		0	0.2634			99.8388
Pl	735B_57R1_73	37 / 1 .	275.745	rim	Ol-gabbro	56.4762	27.3037		9.3529	6.2617	0.1256		0.0044	0.2284			99.7529
Pl	735B_57R1_73	41 / 1 .	275.745	rim	Ol-gabbro	56.9099	27.2169		9.4672	6.1871	0.1149		0	0.1602			100.056
Pl	735B_57R1_73	43 / 1 .	275.745	rim	Ol-gabbro	56.9581	26.9632		9.285	6.2537	0.112		0.0328	0.1801			99.7849
Pl	735B_57R1_73	53 / 1 .	275.745	rim	Ol-gabbro	56.7127	27.2303		9.2268	6.2811	0.0935		0	0.2087			99.7531
Pl	735B_57R1_73	54 / 1 .	275.745	rim	Ol-gabbro	56.9468	27.3321		9.2993	6.1853	0.1587		0	0.1235			100.046
Pl	735B_57R1_73	55 / 1 .	275.745	rim	Ol-gabbro	63.4013	23.2372		4.2866	8.8926	0.1806		0.0117	0.0875			100.097
Pl	735B_57R1_73	69 / 1 .	275.761	rim	Ol-gabbro	63.2919	23.239		4.4989	8.6299	0.2972		0	0.1684			100.125
Pl	735B_57R1_73	70 / 1 .	275.761	rim	Ol-gabbro	56.9548	27.2774		9.3661	6.3026	0.1802		0.0178	0.152			100.251
Pl	735B_58R3_108A	79 / 1 .	284.345	rim	Ol-gabbro	53.3582	29.165		11.9817	4.7908	0.0834		0.015	0.233			99.6271
Pl	735B_58R3_108A	81 / 1 .	284.345	rim	Ol-gabbro	55.2839	28.047		10.5775	5.6054	0.104		0.0621	0.2632			99.9431
Pl	735B_58R3_108A	83 / 1 .	284.345	rim	Ol-gabbro	54.5627	28.4244		10.9988	5.3796	0.1054		0.0248	0.2145			99.7102
Pl	735B_58R3_108A	85 / 1 .	284.345	rim	Ol-gabbro	54.3885	28.3595		10.8065	5.2915	0.1011		0.0177	0.2579			99.2227
Pl	735B_58R3_108A	86 / 1 .	284.349	rim	Ol-gabbro	54.0855	28.8373		11.2019	5.1162	0.0916		0.0071	0.2636			99.6032
Pl	735B_58R3_108A	100 / 1 .	284.342	rim	Ol-gabbro	54.2744	28.1713		10.9217	5.2353	0.0134		0.0194	0.2272			98.8627
Pl	735B_58R3_108A	101 / 1 .	284.342	rim	Ol-gabbro	53.1548	29.5985		12.1664	4.7554	0.0498		0	0.1974			99.9223
Pl	735B_58R3_108A	103 / 1 .	284.342	rim	Ol-gabbro	55.7898	27.6981		10.4817	5.7514	0.083		0.0152	0.208			100.027
Pl	735B_58R3_108A	104 / 1 .	284.342	rim	Ol-gabbro	55.2262	28.2544		10.7571	5.4737	0.097		0.0487	0.2509			100.108
Pl	735B_58R3_108A	106 / 1 .	284.35	rim	Ol-gabbro	53.7691	28.5469		11.4827	5.3002	0.0673		0.0106	0.3174			99.4942
Pl	735B_58R3_108A	108 / 1 .	284.35	rim	Ol-gabbro	54.7265	28.579		11.3258	5.0912	0.0878		0.0354	0.258			100.104
Pl	735B_58R3_108A	110 / 1 .	284.35	rim	Ol-gabbro	53.8777	28.7384		11.477	4.7317	0.0659		0.0238	0.2586			99.1731
Pl	735B_58R3_108A	112 / 1 .	284.353	rim	Ol-gabbro	53.7987	28.4831		11.2599	5.0704	0.0796		0.0337	0.3637			99.0891
Pl	735B_58R3_108A	125 / 1 .	284.351	rim	Ol-gabbro	54.7386	28.2		10.7759	5.4554	0.1033		0.0312	0.2123			99.5167
Pl	735B_58R3_108A	127 / 1 .	284.346	rim	Ol-gabbro	54.2626	28.8453		11.4984	5.0772	0.1061		0	0.2507			100.04
Pl	735B_58R3_108A	129 / 1 .	284.346	rim	Ol-gabbro	54.1868	28.6445		11.5312	5.2357	0.0699		0.0221	0.2473			99.9375
Pl	735B_58R3_108A	136 / 1 .	284.34	rim	Ol-gabbro	55.5146	27.8206		10.3136	5.7776	0.0379		0.0187	0.2675			99.7505
Pl	735B_58R3_108A	137 / 1 .	284.34	rim	Ol-gabbro	55.3068	27.7439		10.5905	5.7223	0.1028		0.0471	0.2272			99.7406
Pl	735B_58R3_108A	146 / 1 .	284.332	rim	Ol-gabbro	55.3368	28.3526		10.6315	5.5242	0.0513		0.0275	0.3098			100.234
Pl	735B_60R4_115B	77 / 1 .	295.385	rim	Ol-gabbro	53.7889	29.3184		11.6992	4.5773	0.0304		0	0.2825			99.6967
Pl	735B_60R4_115B	85 / 1 .	295.383	rim	Ol-gabbro	54.3861	29.0981		11.473	4.9896	0.0276		0.0242	0.2745			100.273
Pl	735B_60R4_115B	88 / 1 .	295.383	rim	Ol-gabbro	53.9189	28.9107		11.6718	4.9447	0.0648		0.025	0.2571			99.793
Pl	735B_60R4_115B	101 / 1 .	295.397	rim	Ol-gabbro	53.3055	29.6196		12.0173	4.7875	0.0172		0.0112	0.3442			100.103
Pl	735B_60R4_115B	103 / 1 .	295.397	rim	Ol-gabbro	53.6038	29.3124		12.0525	4.6519	0.037		0.0403	0.3339			100.032
Pl	735B_60R4_115B	105 / 1 .	295.401	rim	Ol-gabbro	52.5532	30.0696		12.9002	4.1711	0.0042		0.0325	0.2014			99.9322
Pl	735B_60R4_115B	109 / 1 .	295.391	rim	Ol-gabbro	54.206	28.8392		11.4987	4.9051	0.0411		0.049	0.3012			99.8403
Pl	735B_60R4_115B	110 / 1 .	295.391	rim	Ol-gabbro	54.6761	28.8251		11.2123	5.1545	0.0462		0.0282	0.293			100.235
Pl	735B_60R4_115B	113 / 1 .	295.391	rim	Ol-gabbro	53.71	29.1832		11.8193	4.6359	0.0317		0.0248	0.286			99.6909
Pl	735B_60R4_115B	7 / 1 .	295.387	rim	Ol-gabbro	53.6169	29.4474		11.9821	4.8266	0.0055		0.0018	0.275			100.155
Pl	735B_60R4_115B	9 / 1 .	295.384	rim	Ol-gabbro	53.317	29.6506		12.4295	4.7201	0.0318		0.0474	0.2589			100.455
Pl	735B_60R4_115B	16 / 1 .	295.382	rim	Ol-gabbro	54.9858	28.179		10.8771	5.281	0.011		0	0.3433			99.6772
Pl	735B_60R4_115B	17 / 1 .	295.382	rim	Ol-gabbro	54.4196	28.7856		11.246	5.0311	0.0608		0.0518	0.2761			99.871
Pl	735B_60R4_115B	19 / 1 .	295.382	rim	Ol-gabbro	53.9513	28.8843		11.645	4.8478	0.0761		0.0304	0.2739			99.7088
Pl	735B_60R4_115B	27 / 1 .	295.388	rim	Ol-gabbro	55.0482	28.345		10.9275	5.3293	0.0647		0	0.2436			99.9583
Pl	735B_60R4_115B	28 / 1 .	295.388	rim	Ol-gabbro	53.5688	29.4153		12.1625	4.7242	0.0699		0.0249	0.2938			100.259
Pl	735B_60R4_115B	29 / 1 .	295.388	rim	Ol-gabbro	53.7173	28.9133		11.521	4.9206	0.0275		0.0178	0.2402			99.3577
Pl	735B_60R4_115B	40 / 1 .	295.386	rim	Ol-gabbro	53.9696	29.1835		11.9003	4.8811	0.0317		0.0143	0.384			100.365
Pl	735B_60R4_115B	41 / 1 .	295.386	rim	Ol-gabbro	55.1304	28.3453		11.039	5.1724	0.0469		0.0401	0.3897			100.164
Pl	735B_68R2_10.5A	28 / 1 .	336.541	rim	Ol-gabbro	53.459	29.6148		12.3583	4.5386	0.0662		0.039	0.295			100.371
Pl	735B_68R2_10.5A	35 / 1 .	336.535	rim	Ol-gabbro	49.4339	32.2094		15.3169	2.7339	0.0282		0	0.2506			99.9729
Pl	735B_68R2_10.5A	38 / 1 .	336.535	rim	Ol-gabbro	53.0933	29.7755		12.8552	4.3539	0.0013		0.0283	0.2512			100.359
Pl	735B_68R2_10.5A	39 / 1 .	336.535	rim	Ol-gabbro	53.7898	29.0134		11.6407	4.9123	0.0783		0.069	0.2503			99.7538
Pl	735B_68R2_10.5A	40 / 1 .	336.535	rim	Ol-gabbro	51.5421	30.4113		13.6786	3.6016	0.0378		0.0097	0.258			99.5391
Pl	735B_68R2_10.5A	43 / 1 .	336.537	rim	Ol-gabbro	52.2858	30.2267		13.0647	4.0175	0.0569		0.0266	0.2619			99.9401
Pl	735B_68R2_10.5A	56 / 1 .	336.547	rim	Ol-gabbro	51.2981	30.6363		14.1328	3.6565	0.0404		0.0371	0.2238			100.025
Pl	735B_68R2_10.5A	57 / 1 .	336.547	rim	Ol-gabbro	52.3714	30.0214		13.0213	4.0267	0.0649		0.0584	0.255			99.8191
Pl	735B_68R2_10.5A	60 / 1 .	336.546	rim	Ol-gabbro	52.0381	30.4677		13.3451	3.975	0.0255		0.0185	0.2389			100.109
Pl	735B_68R2_10.5A	61 / 1 .	336.546	rim	Ol-gabbro	52.9067	29.9777		12.8905	4.1604	0.0622		0.031	0.2811			100.31
Pl	735B_68R2_10.5A	73 / 1 .	336.535	rim	Ol-gabbro	53.0361	29.7302		12.4537	4.4703	0.0054		0.016	0.3056			100.017
Pl	735B_68R2_10.5A	74 / 1 .	336.535	rim	Ol-gabbro	53.0014	29.7275		12.8783	4.2693	0.0663		0.0053	0.3401			100.288
Pl	735B_73R5_9	14 / 1 .	371.123	rim	Ol-gabbro	52.0139	30.2253		12.9838	4.0693	0.0459		0.0592	0.1548			99.5522
Pl	735B_73R5_9	16 / 1 .	371.123	rim	Ol-gabbro	52.3334	30.17		12.843	4.0551	0.0512		0.0308	0.2118			99.6953
Pl	735B_73R5_9	17 / 1 .	371.123	rim	Ol-gabbro	49.34	31.466		14.9719	3.1596	0.0254		0.0481	0.1983			99.2093
Pl	735B_73R5_9	34 / 1 .	371.132	rim	Ol-gabbro	52.7942	29.4775		12.6642	4.5671	0.0325		0.0408	0.1866			99.7629
Pl	735B_73R5_9	38 / 1 .	371.135	rim	Ol-gabbro	52.6575	30.1942		12.8337	4.281	0.0392		0.0159	0.2504			100.272
Pl	735B_73R5_9	44 / 1 .	371.137	rim	Ol-gabbro	52.7039	29.9621		12.6137	4.4018	0.0322		0.0211	0.2018			99.9366
Pl	735B_73R5_9	46 / 1 .	371.137	rim	Ol-gabbro	53.0259	29.2344		12.1954	4.5537	0.0514		0.0195	0.2007			99.281
Pl	735B_73R5_9	58 / 1 .	371.145	rim	Ol-gabbro	49.7763	31.7064		14.8376	3.2796	0.0525		0.0168	0.2444			99.9136
Pl	735B_73R5_9	60 / 1 .	371.145	rim	Ol-gabbro	52.7328	30.1085		12.869	4.3605	0.0623		0.0417	0.1995			100.374
Pl	735B_73R5_9	66 / 1 .	371.15	rim	Ol-gabbro	52.9724	29.3262		12.5661	4.6804	0.0348		0.0404	0.2722			99.8925
Pl	735B_73R5_9	69 / 1 .	371.15	rim	Ol-gabbro	52.8912	29.951		12.7837	4.3346	0.0578		0.022	0.1779			100.218
Pl	735B_73R5_9	70 / 1 .	371.15	rim	Ol-gabbro	52.9939	29.9066		12.5715	4.3176	0.0502		0.0204	0.1566			100.017
Pl	735B_75R5_27	2 / 1 .	390.357	rim	Ol-gabbro	51.5643	30.7614		13.6123	3.6096	0.0247		0	0.1798			99.7521
Pl	735B_75R5_27	3 / 1 .	390.357	rim	Ol-gabbro	53.6467	29.3812		11.82	4.6685	0.0688		0.0036	0.1495			99.7383
Pl	735B_75R5_27	21 / 1 .	390.353	rim	Ol-gabbro	48.1071	32.5688		16.1888	2.5464	0.0136		0.0088	0.2503			99.6838
Pl	735B_75R5_27	23 / 1 .	390.353	rim	Ol-gabbro	52.9723	29.4874		12.3716	4.5089	0.0289		0.0036	0.2576			99.6303
Pl	735B_75R5_27	36 / 1 .	390.353	rim	Ol-gabbro	53.0457	29.5987		12.5896	4.3155	0.0454		0.0329	0.181			99.8088
Pl	735B_75R5_27	40 / 1 .	390.353	rim	Ol-gabbro	50.7591	31.2964		14.6177	3.2422	0.0164		0.023	0.2131			100.168
Pl	735B_75R5_27	44 / 1 .	390.351	rim	Ol-gabbro	52.0399	29.8255		12.6321	4.1684	0.0644		0.0293	0.2419			99.0015
Pl	735B_75R5_27	54 / 1 .	390.347	rim	Ol-gabbro	52.4866	30.1161		13.1003	4.1982	0.0645		0.0561	0.1824			100.204
Pl	735B_75R5_27	55 / 1 .	390.347	rim	Ol-gabbro	50.0243	31.6081		15.1413	3.0346	0.0423		0.0397	0.1933			100.084
Pl	735B_75R5_27	72 / 1 .	390.342	rim	Ol-gabbro	52.5914	29.8251		12.6651	4.1248	0.044		0.0098	0.1481			99.4083
Pl	735B_75R5_27	73 / 1 .	390.342	rim	Ol-gabbro	52.7697	30.0298		13.0106	4.209	0.0495		0.0143	0.2006			100.283
Pl	735B_75R5_27	96 / 1 .	390.336	rim	Ol-gabbro	50.8053	30.9173		14.0951	3.4732	0.0669		0.0344	0.151			99.5432
Pl	735B_75R5_27	97 / 1 .	390.336	rim	Ol-gabbro	52.9205	29.8812		12.7453	4.3962	0.06		0.0141	0.1923			100.21
Pl	735B_75R5_27	109 / 1 .	390.347	rim	Ol-gabbro	52.4963	30.1286		12.6738	4.2674	0.0662		0.0188	0.1881			99.8392
Pl	735B_75R5_27	110 / 1 .	390.347	rim	Ol-gabbro	51.9285	30.5023		13.6224	3.9851	0.0096		0.033	0.3371			100.418
Pl	735B_75R5_27	113 / 1 .	390.344	rim	Ol-gabbro	52.6409	29.7841		12.6508	4.1252	0.0567		0.0268	0.1431			99.4276
Pl	735B_75R5_27	124 / 1 .	390.341	rim	Ol-gabbro	51.2875	30.9179		13.9228	3.5965	0.0533		0	0.2476			100.026
Pl	735B_75R5_27	125 / 1 .	390.341	rim	Ol-gabbro	52.8079	29.7949		12.6085	4.2215	0.0289		0.0018	0.1688			99.6323
Pl	735B_69R3_52B	9 / 1 .	344.129	rim	Ol-gabbro	50.2701	32.2427		15.0524	2.9634	0.0379		0.0127	0.2449			100.824
Pl	735B_69R3_52B	11 / 1 .	344.129	rim	Ol-gabbro	53.1581	29.9271		12.5791	4.2272	0.0084		0.0325	0.2311			100.163
Pl	735B_69R3_52B	22 / 1 .	344.13	rim	Ol-gabbro	53.2581	30.1881		12.6167	4.4095	0.0405		0.0388	0.1868			100.738
Pl	735B_69R3_52B	23 / 1 .	344.13	rim	Ol-gabbro	53.5622	30.0451		12.3524	4.4288	0.0318		0.0111	0.1999			100.631
Pl	735B_69R3_52B	30 / 1 .	344.13	rim	Ol-gabbro	49.6238	32.03		14.8856	2.9336	0.0384		0	0.3018			99.8132
Pl	735B_69R3_52B	38 / 1 .	344.136	rim	Ol-gabbro	53.4084	29.5079		12.0522	4.4561	0.0358		0.0027	0.2241			99.6872
Pl	735B_69R3_52B	40 / 1 .	344.136	rim	Ol-gabbro	51.3535	31.0897		14.1012	3.6157	0.0385		0	0.2115			100.41
Pl	735B_69R3_52B	42 / 1 .	344.136	rim	Ol-gabbro	49.9875	32.2105		14.8296	3.1941	0.0263		0	0.1821			100.43
Pl	735B_69R3_52B	43 / 1 .	344.136	rim	Ol-gabbro	52.8306	30.1964		12.8995	4.4039	0.0359		0.017	0.2235			100.607
Pl	735B_69R3_52B	62 / 1 .	344.141	rim	Ol-gabbro	49.8958	32.4479		15.0319	3.0854	0.0118		0.0254	0.2199			100.718
Pl	735B_69R3_52B	63 / 1 .	344.141	rim	Ol-gabbro	53.1321	30.1202		12.7078	4.4842	0.0105		0.0204	0.2588			100.734
Pl	735B_69R3_52B	70 / 1 .	344.135	rim	Ol-gabbro	53.3953	29.636		11.9765	4.588	0		0.0277	0.3042			99.9277
Pl	735B_69R3_52B	73 / 1 .	344.135	rim	Ol-gabbro	51.5275	31.192		13.757	3.8946	0.0079		0.0237	0.2339			100.637
Pl	735B_69R3_52B	74 / 1 .	344.135	rim	Ol-gabbro	48.2339	33.1869		16.3867	2.3922	0.0442		0	0.2416			100.486
Pl	735B_69R3_52B	80 / 1 .	344.137	rim	Ol-gabbro	53.5882	29.5114		12.183	4.4575	0.0725		0.036	0.2508			100.099
Pl	735B_69R3_52B	83 / 1 .	344.137	rim	Ol-gabbro	52.9974	30.0481		12.4023	4.3874	0.0306		0.0135	0.1904			100.07
Pl	735B_69R3_52B	84 / 1 .	344.129	rim	Ol-gabbro	52.8133	29.9601		12.7952	4.2266	0.0626		0.0144	0.1977			100.07
Pl	735B_69R3_52B	86 / 1 .	344.129	rim	Ol-gabbro	53.1412	29.9163		12.2588	4.3202	0.022		0.0391	0.2276			99.9252
Pl	735B_69R3_52B	87 / 1 .	344.129	rim	Ol-gabbro	53.8063	29.4103		12.2595	4.7709	0.0836		0.0379	0.2261			100.595
Pl	735B_69R3_52B	94 / 1 .	344.127	rim	Ol-gabbro	53.922	29.6724		12.086	4.9126	0.0377		0	0.2161			100.847
Pl	735B_80R1_136	89 / 1 .	425.363	core	Ol-gabbro	59.5888	25.7769		7.4199	7.3339	0.1217		0.0287	0.1478			100.418
Pl	735B_80R1_136	90 / 1 .	425.363	core	Ol-gabbro	58.782	25.9185		7.807	7.4023	0.1317		0.0018	0.1549			100.198
Pl	735B_80R1_136	92 / 1 .	425.363	core	Ol-gabbro	59.276	25.868		7.8658	7.1763	0.1601		0.0198	0.1397			100.506
Pl	735B_80R1_136	104 / 1 .	425.37	core	Ol-gabbro	58.2394	26.0603		8.3809	6.6625	0.1078		0.0036	0.1718			99.6263
Pl	735B_80R1_136	113 / 1 .	425.372	core	Ol-gabbro	58.2165	26.2189		8.0706	7.0464	0.0547		0	0.06			99.6671
Pl	735B_80R1_136	115 / 1 .	425.372	core	Ol-gabbro	58.9384	26.1619		7.7602	7.0746	0.1441		0	0.1132			100.192
Pl	735B_80R1_136	116 / 1 .	425.372	core	Ol-gabbro	50.7773	31.0093		14.0162	3.6173	0.0798		0	0.1426			99.6425
Pl	735B_80R1_136	121 / 1 .	425.374	core	Ol-gabbro	51.0417	30.8997		13.8778	3.8432	0.0351		0	0.0803			99.7778
Pl	735B_80R1_136	122 / 1 .	425.374	core	Ol-gabbro	51.0681	30.81		13.9165	3.7662	0.0216		0.0239	0.1239			99.7302
Pl	735B_80R1_136	124 / 1 .	425.374	core	Ol-gabbro	49.8732	31.4551		14.2956	3.4652	0.0431		0.0115	0.145			99.2887
Pl	735B_80R1_136	129 / 1 .	425.38	core	Ol-gabbro	50.8194	31.086		14.092	3.8341	0.0161		0.0212	0.1075			99.9763
Pl	735B_80R1_136	130 / 1 .	425.38	core	Ol-gabbro	50.7009	31.1047		14.0387	3.5961	0		0.0124	0.0781			99.5309
Pl	735B_80R1_136	132 / 1 .	425.38	core	Ol-gabbro	53.7713	29.1409		11.7345	5.0098	0.0853		0.0009	0.1337			99.8764
Pl	735B_80R1_136	133 / 1 .	425.38	core	Ol-gabbro	49.4723	31.7996		15.0986	2.9751	0.0565		0.0414	0.1014			99.5449
Pl	735B_80R1_136	137 / 1 .	425.38	core	Ol-gabbro	58.2828	26.4189		8.3947	6.7378	0.0861		0.0081	0.0543			99.9827
Pl	735B_80R1_136	149 / 1 .	425.384	core	Ol-gabbro	47.9126	32.887		16.0809	2.2557	0		0.0316	0.1541			99.3219
Pl	735B_80R1_136	159 / 1 .	425.389	core	Ol-gabbro	50.8822	31.5181		14.1997	3.5073	0.0648		0.0194	0.1339			100.325
Pl	735B_80R1_136	163 / 1 .	425.389	core	Ol-gabbro	48.3778	32.8046		16.2755	2.5364	0.0133		0.0096	0.0818			100.099
Pl	735B_80R1_136	169 / 1 .	425.387	core	Ol-gabbro	49.2995	31.7131		14.7228	3.1372	0.0281		0.0342	0.1127			99.0476
Pl	735B_81R5_7	8 / 1 .	439.245	core	Ol-gabbro	51.4436	31.0914		13.7459	3.7507	0.0094		0.0483	0.1093			100.199
Pl	735B_81R5_7	10 / 1 .	439.245	core	Ol-gabbro	52.9249	29.9688		12.4579	4.5245	0.0256		0.0088	0.1051			100.016
Pl	735B_81R5_7	11 / 1 .	439.245	core	Ol-gabbro	52.7863	29.7757		12.2128	4.5794	0.0202		0.046	0.0864			99.5068
Pl	735B_81R5_7	12 / 1 .	439.246	core	Ol-gabbro	53.0862	29.6504		12.2286	4.4256	0.0592		0.0202	0.0882			99.5584
Pl	735B_81R5_7	30 / 1 .	439.247	core	Ol-gabbro	52.7793	30.2467		12.6837	4.4841	0.0461		0	0.0649			100.305
Pl	735B_81R5_7	34 / 1 .	439.247	core	Ol-gabbro	52.508	29.9568		12.7654	4.3897	0.0446		0.0301	0.1402			99.8348
Pl	735B_81R5_7	44 / 1 .	439.252	core	Ol-gabbro	52.2156	30.4012		12.7879	4.1773	0.0162		0.0176	0.1487			99.7645
Pl	735B_81R5_7	45 / 1 .	439.252	core	Ol-gabbro	52.2626	30.1036		12.8644	4.301	0.0297		0.0301	0.1204			99.7118
Pl	735B_81R5_7	47 / 1 .	439.252	core	Ol-gabbro	52.05	30.4088		12.8556	4.3414	0.0406		0.0284	0.1401			99.8649
Pl	735B_81R5_7	50 / 1 .	439.253	core	Ol-gabbro	52.4236	30.259		13.0913	4.2215	0.0311		0.015	0.0824			100.124
Pl	735B_81R5_7	57 / 1 .	439.255	core	Ol-gabbro	52.3318	30.1098		12.9669	4.0546	0.0522		0.0368	0.2154			99.7675
Pl	735B_81R5_7	58 / 1 .	439.257	core	Ol-gabbro	52.7603	29.4687		12.4203	4.4977	0.0579		0.0265	0.0975			99.3289
Pl	735B_81R5_7	60 / 1 .	439.257	core	Ol-gabbro	53.1837	29.7256		12.1577	4.6164	0.0447		0.0506	0.1254			99.9041
Pl	735B_81R5_7	61 / 1 .	439.257	core	Ol-gabbro	53.4031	29.4637		12.0921	4.5711	0.0433		0.0293	0.0958			99.6984
Pl	735B_81R5_7	81 / 1 .	439.264	core	Ol-gabbro	52.0525	30.1297		13.1868	4.1933	0.0176		0.0363	0.1515			99.7677
Pl	735B_81R5_7	82 / 1 .	439.262	core	Ol-gabbro	52.294	30.6412		13.1484	4.0573	0.0311		0.0203	0.1126			100.305
Pl	735B_81R5_7	83 / 1 .	439.262	core	Ol-gabbro	51.9459	30.7615		13.2268	4.003	0.0378		0.0265	0.0922			100.094
Pl	735B_79R3_100	7 / 1 .	418.507	core	Ol-gabbro	51.3649	31.0616		13.8155	3.8488	0.0513		0.0663	0.1908			100.399
Pl	735B_79R3_100	25 / 1 .	418.503	core	Ol-gabbro	51.1982	31.2924		13.6091	3.8145	0.0406		0.0142	0.1369			100.106
Pl	735B_79R3_100	28 / 1 .	418.503	core	Ol-gabbro	52.3193	30.1625		12.969	4.2245	0.046		0.0186	0.0945			99.8344
Pl	735B_79R3_100	30 / 1 .	418.506	core	Ol-gabbro	47.7231	33.3516		16.6561	2.284	0.0094		0	0.074			100.098
Pl	735B_79R3_100	42 / 1 .	418.515	core	Ol-gabbro	51.275	30.9336		13.7806	3.6721	0.0296		0.0097	0.1305			99.8311
Pl	735B_79R3_100	43 / 1 .	418.515	core	Ol-gabbro	51.4824	30.7121		13.1844	4.0226	0.0352		0.0319	0.0747			99.5433
Pl	735B_79R3_100	47 / 1 .	418.517	core	Ol-gabbro	52.5101	30.1022		12.6177	4.4346	0.05		0.0027	0.1272			99.8445
Pl	735B_79R3_100	48 / 1 .	418.517	core	Ol-gabbro	52.1374	30.415		13.297	4.1502	0.0716		0.0266	0.1098			100.208
Pl	735B_79R3_100	54 / 1 .	418.524	core	Ol-gabbro	49.3633	32.3044		15.3538	2.9336	0.0324		0.0379	0.115			100.14
Pl	735B_79R3_100	58 / 1 .	418.524	core	Ol-gabbro	51.6304	30.8537		13.828	3.841	0.027		0.0177	0.173			100.371
Pl	735B_79R3_100	59 / 1 .	418.522	core	Ol-gabbro	51.5337	30.7692		13.6508	3.9261	0.0459		0.0177	0.1739			100.117
Pl	735B_79R3_100	65 / 1 .	418.526	core	Ol-gabbro	51.6152	30.6189		13.4633	3.9762	0.0351		0.0504	0.102			99.8611
Pl	735B_79R3_100	74 / 1 .	418.532	core	Ol-gabbro	51.7469	30.3157		13.2442	4.0742	0.0121		0.03	0.161			99.5841
Pl	735B_79R3_100	76 / 1 .	418.532	core	Ol-gabbro	51.8745	30.9543		13.7565	4.0689	0.0458		0.0212	0.0781			100.799
Pl	735B_76R3_96	46 / 1 .	397.581	core	Ol-gabbro	52.7559	30.0302		12.7129	4.3478	0.0426		0.0355	0.1652			100.09
Pl	735B_76R3_96	50 / 1 .	397.581	core	Ol-gabbro	52.4986	30.0136		13.1464	4.2158	0.022		0.0009	0.1744			100.072
Pl	735B_76R3_96	58 / 1 .	397.583	core	Ol-gabbro	52.3534	29.9837		13.1012	4.028	0.0192		0.0311	0.2335			99.7501
Pl	735B_76R3_96	60 / 1 .	397.587	core	Ol-gabbro	52.945	29.7363		12.4779	4.4153	0.0427		0.0125	0.1686			99.7983
Pl	735B_76R3_96	62 / 1 .	397.587	core	Ol-gabbro	52.1754	30.0157		13.0891	4.2349	0.0399		0.0338	0.2227			99.8115
Pl	735B_76R3_96	71 / 1 .	397.587	core	Ol-gabbro	54.0697	29.0815		11.6968	4.8442	0.0648		0.0134	0.194			99.9644
Pl	735B_76R3_96	73 / 1 .	397.587	core	Ol-gabbro	52.2252	30.3067		13.2277	4.2181	0.0358		0.0077	0.2045			100.226
Pl	735B_76R3_96	79 / 1 .	397.585	core	Ol-gabbro	52.8915	29.7791		12.7039	4.3749	0.0508		0.0249	0.2516			100.077
Pl	735B_76R3_96	80 / 1 .	397.585	core	Ol-gabbro	52.8492	29.4479		12.1815	4.6748	0.0371		0.0205	0.1988			99.4098
Pl	735B_76R3_96	82 / 1 .	397.585	core	Ol-gabbro	52.8689	29.7255		12.5632	4.4685	0.04		0.0027	0.1578			99.8266
Pl	735B_76R3_96	88 / 1 .	397.576	core	Ol-gabbro	52.4917	29.8345		12.6415	4.281	0.0289		0.016	0.1405			99.4341
Pl	735B_76R3_96	91 / 1 .	397.576	core	Ol-gabbro	52.4326	29.7969		12.7468	4.1568	0.0266		0	0.129			99.2887
Pl	735B_76R3_96	100 / 1 .	397.577	core	Ol-gabbro	52.9519	29.6925		12.2749	4.7963	0.0701		0.0071	0.1466			99.9394
Pl	735B_76R3_96	101 / 1 .	397.577	core	Ol-gabbro	53.4634	29.6675		12.5737	4.6	0.0481		0.0426	0.1443			100.54
Pl	735B_76R3_96	103 / 1 .	397.577	core	Ol-gabbro	52.8188	30.0159		12.6395	4.43	0.0302		0.0169	0.1553			100.107
Pl	735B_76R3_96	109 / 1 .	397.575	core	Ol-gabbro	52.6548	29.8426		12.6469	4.398	0.0424		0.0489	0.2063			99.8399
Pl	735B_76R3_96	111 / 1 .	397.572	core	Ol-gabbro	52.363	29.8401		12.5555	4.363	0.0386		0	0.2031			99.3633
Pl	735B_76R3_96	112 / 1 .	397.572	core	Ol-gabbro	53.081	29.8813		12.6084	4.4307	0.0481		0.0009	0.1488			100.199
Pl	735B_76R3_96	114 / 1 .	397.572	core	Ol-gabbro	52.1033	29.949		13.0677	4.189	0.0452		0.0198	0.1294			99.5034
Pl	735B_76R3_96	122 / 1 .	397.562	core	Ol-gabbro	53.0191	30.0514		12.8809	4.2445	0.0495		0.0133	0.0945			100.353
Pl	735B_79R4_20	107 / 1 .	419.152	core	Ol-gabbro	51.1845	31.2666		14.0579	3.5332	0.0439		0.0088	0.0487			100.144
Pl	735B_79R4_20	109 / 1 .	419.152	core	Ol-gabbro	51.4349	31.6756		13.957	3.7301	0.0357		0	0.058			100.891
Pl	735B_79R4_20	111 / 1 .	419.152	core	Ol-gabbro	50.9446	31.5879		14.2036	3.2292	0.0144		0.0296	0.0665			100.076
Pl	735B_79R4_20	117 / 1 .	419.157	core	Ol-gabbro	51.3351	31.2102		14.1648	3.5577	0.0342		0	0.0425			100.344
Pl	735B_79R4_20	119 / 1 .	419.157	core	Ol-gabbro	50.9337	31.3625		14.271	3.6632	0		0.0178	0.1011			100.349
Pl	735B_79R4_20	120 / 1 .	419.157	core	Ol-gabbro	50.7046	31.2331		13.9861	3.6347	0		0.0347	0.0928			99.686
Pl	735B_79R4_20	1 / 1 .	419.159	core	Ol-gabbro	51.2656	31.0064		13.7482	3.4859	0.0132		0.0349	0.0806			99.6348
Pl	735B_79R4_20	5 / 1 .	419.159	core	Ol-gabbro	51.9918	30.8322		13.3364	3.8966	0.0233		0	0.0487			100.129
Pl	735B_79R4_20	26 / 1 .	419.159	core	Ol-gabbro	50.8077	31.5284		14.1438	3.4548	0.059		0.0186	0.0637			100.076
Pl	735B_79R4_20	31 / 1 .	419.159	core	Ol-gabbro	51.3196	31.0038		13.8109	3.6045	0.0027		0.0035	0.0803			99.8253
Pl	735B_79R4_20	32 / 1 .	419.159	core	Ol-gabbro	50.3261	31.5818		14.657	3.1538	0		0	0.0729			99.7916
Pl	735B_79R4_20	44 / 1 .	419.163	core	Ol-gabbro	51.3298	31.2278		13.9183	3.5997	0.0219		0.0318	0.0807			100.21
Pl	735B_79R4_20	46 / 1 .	419.163	core	Ol-gabbro	51.6463	30.7271		13.2853	4.0078	0.004		0	0.0449			99.7154
Pl	735B_79R4_20	48 / 1 .	419.163	core	Ol-gabbro	51.9007	30.9718		13.549	3.748	0.0302		0.0009	0.0795			100.28
Pl	735B_79R4_20	56 / 1 .	419.168	core	Ol-gabbro	50.9547	31.4273		14.038	3.3981	0.0123		0.0026	0.0451			99.8781
Pl	735B_79R4_20	58 / 1 .	419.168	core	Ol-gabbro	51.5653	31.0548		13.9361	3.6812	0.0165		0.0035	0.0811			100.339
Pl	735B_79R4_20	60 / 1 .	419.168	core	Ol-gabbro	51.5048	30.8978		13.7784	3.5903	0.0291		0.0111	0.0745			99.886
Pl	735B_79R4_20	75 / 1 .	419.172	core	Ol-gabbro	51.4042	31.4963		14.0577	3.4563	0.0145		0.0144	0.0585			100.502
Pl	735B_79R4_20	76 / 1 .	419.172	core	Ol-gabbro	50.5276	31.7495		14.0078	3.3683	0.0041		0	0.068			99.7253
Pl	735B_79R4_20	78 / 1 .	419.172	core	Ol-gabbro	51.1719	31.2165		13.7969	3.6288	0.0178		0.0195	0.053			99.9044
Pl	735B_79R4_20	83 / 1 .	419.174	core	Ol-gabbro	51.498	31.1726		13.7727	3.7919	0.0013		0.0076	0.0706			100.315
Pl	735B_79R4_20	85 / 1 .	419.174	core	Ol-gabbro	50.6953	31.848		14.4538	3.4647	0.0265		0.0054	0.0495			100.543
Pl	735B_79R4_20	93 / 1 .	419.179	core	Ol-gabbro	52.0225	30.3371		13.4538	4.0139	0.0192		0	0.101			99.9475
Pl	735B_83R7_43B	8 / 1 .	461.682	core	Ol-gabbro	51.0854	31.2314		14.1788	3.6181	0.015		0.0387	0.1933			100.361
Pl	735B_83R7_43B	11 / 1 .	461.682	core	Ol-gabbro	51.5531	31.0382		13.7478	3.7724	0.0386		0.0249	0.1171			100.292
Pl	735B_83R7_43B	13 / 1 .	461.684	core	Ol-gabbro	51.7929	30.625		13.6285	3.8308	0.0495		0	0.0516			99.9783
Pl	735B_83R7_43B	22 / 1 .	461.697	core	Ol-gabbro	51.5322	30.5491		13.1155	4.0897	0.1127		0	0.0924			99.4916
Pl	735B_83R7_43B	23 / 1 .	461.697	core	Ol-gabbro	50.9884	31.7394		14.7657	3.4081	0.0457		0.0179	0.0898			101.055
Pl	735B_83R7_43B	24 / 1 .	461.697	core	Ol-gabbro	48.8152	33.2019		16.0969	2.4541	0		0.0132	0.1112			100.692
Pl	735B_83R7_43B	26 / 1 .	461.697	core	Ol-gabbro	52.9155	30.1219		12.47	4.4018	0.0543		0	0.0803			100.044
Pl	735B_83R7_43B	36 / 1 .	461.701	core	Ol-gabbro	51.3073	31.5748		14.5458	3.4745	0.0412		0.0346	0.1134			101.092
Pl	735B_83R7_43B	38 / 1 .	461.701	core	Ol-gabbro	50.2748	31.9451		14.866	3.1127	0.0219		0.0132	0.0587			100.292
Pl	735B_83R7_43B	41 / 1 .	461.701	core	Ol-gabbro	48.3452	33.2263		16.2862	2.197	0.0312		0.026	0.1003			100.212
Pl	735B_83R7_43B	48 / 1 .	461.7	core	Ol-gabbro	48.0501	33.358		16.6879	2.0516	0.0078		0.0143	0.1783			100.348
Pl	735B_83R7_43B	57 / 1 .	461.702	core	Ol-gabbro	52.3029	30.6334		13.387	4.2206	0.0445		0.0178	0.0894			100.696
Pl	735B_83R7_43B	59 / 1 .	461.702	core	Ol-gabbro	50.1615	31.9498		14.9161	3.2265	0.0261		0.0337	0.0971			100.411
Pl	735B_83R7_43B	68 / 1 .	461.692	core	Ol-gabbro	49.2718	32.6581		15.4539	2.8063	0.0511		0	0.0781			100.319
Pl	735B_83R7_43B	70 / 1 .	461.69	core	Ol-gabbro	49.6732	32.5378		15.2626	2.9212	0		0	0.2584			100.653
Pl	735B_83R7_43B	72 / 1 .	461.69	core	Ol-gabbro	51.1974	31.449		14.2207	3.4513	0.0246		0.0106	0.0628			100.416
Pl	735B_83R7_43B	80 / 1 .	461.688	core	Ol-gabbro	51.1062	31.0029		14.0478	3.6628	0.0316		0.0195	0.0889			99.9597
Pl	735B_83R7_43B	82 / 1 .	461.688	core	Ol-gabbro	47.8475	33.2526		16.6227	2.0973	0.0014		0	0.118			99.9395
Pl	735B_83R7_43B	86 / 1 .	461.684	core	Ol-gabbro	52.4948	30.2229		12.782	4.1644	0.099		0.0657	0.1111			99.9399
Pl	735B_83R7_43B	87 / 1 .	461.684	core	Ol-gabbro	57.7922	27.0917		9.0963	6.3812	0.1392		0.0045	0.0487			100.554
Pl	735B_83R7_43B	90 / 1 .	461.684	core	Ol-gabbro	50.5648	31.4999		14.5159	3.3073	0.0314		0.0035	0.1356			100.058
Pl	735B_83R7_43B	99 / 1 .	461.69	core	Ol-gabbro	50.8112	31.4445		14.413	3.4564	0.0137		0.0186	0.0903			100.248
Pl	735B_83R7_43B	108 / 1 .	461.689	core	Ol-gabbro	50.1111	31.8704		14.83	3.1318	0.0164		0.0317	0.0906			100.082
Pl	735B_83R7_43B	109 / 1 .	461.689	core	Ol-gabbro	51.4671	31.1373		13.9231	3.7051	0.0105		0	0.1321			100.375
Pl	735B_80R2_51	9 / 1 .	425.987	core	Ol-gabbro	49.0566	32.6513		15.7421	2.6594	0.0164		0.0027	0.1118			100.24
Pl	735B_80R2_51	13 / 1 .	425.987	core	Ol-gabbro	49.9465	31.8111		15.0857	3.0477	0.0462		0.0171	0.0794			100.034
Pl	735B_80R2_51	14 / 1 .	425.987	core	Ol-gabbro	50.2919	31.6825		14.6361	3.274	0.0462		0.0394	0.0856			100.056
Pl	735B_80R2_51	24 / 1 .	425.992	core	Ol-gabbro	51.0293	30.7802		14.0828	3.6359	0.0247		0	0.0766			99.6295
Pl	735B_80R2_51	26 / 1 .	425.992	core	Ol-gabbro	51.2568	31.202		14.1405	3.6062	0.0026		0.0429	0.0966			100.348
Pl	735B_80R2_51	29 / 1 .	425.992	core	Ol-gabbro	51.2474	31.3875		14.0458	3.5464	0.0053		0.0051	0.0579			100.295
Pl	735B_80R2_51	42 / 1 .	425.999	core	Ol-gabbro	51.3352	30.6692		13.4896	3.7209	0.0421		0.0538	0.1578			99.4686
Pl	735B_80R2_51	44 / 1 .	425.999	core	Ol-gabbro	51.8602	30.5078		13.1885	3.9193	0.0039		0.0298	0.0862			99.5957
Pl	735B_80R2_51	45 / 1 .	425.999	core	Ol-gabbro	49.4538	32.2727		15.3547	2.8566	0.039		0.0144	0.048			100.039
Pl	735B_80R2_51	47 / 1 .	425.999	core	Ol-gabbro	51.3482	30.9098		13.4737	3.781	0.0418		0.0235	0.0799			99.6579
Pl	735B_80R2_51	61 / 1 .	425.994	core	Ol-gabbro	50.6741	31.1084		14.4258	3.5399	0.0278		0.0379	0.0951			99.909
Pl	735B_80R2_51	62 / 1 .	425.994	core	Ol-gabbro	51.741	30.5301		13.5222	3.9285	0.0195		0	0.0989			99.8402
Pl	735B_80R2_51	63 / 1 .	425.994	core	Ol-gabbro	51.7405	30.9577		13.3862	3.9578	0.0698		0.0299	0.0967			100.239
Pl	735B_80R2_51	65 / 1 .	425.994	core	Ol-gabbro	50.1039	31.329		14.5047	3.2939	0.0109		0.0266	0.1251			99.3941
Pl	735B_80R2_51	66 / 1 .	425.996	core	Ol-gabbro	51.352	30.9842		13.854	3.7076	0.0181		0.0317	0.1274			100.075
Pl	735B_80R2_51	68 / 1 .	425.996	core	Ol-gabbro	50.5133	31.6342		14.4306	3.2669	0.017		0.0221	0.0677			99.9518
Pl	735B_80R2_51	71 / 1 .	425.996	core	Ol-gabbro	49.4492	32.3854		15.386	2.8294	0.0274		0.022	0.0894			100.189
Pl	735B_80R2_51	72 / 1 .	425.996	core	Ol-gabbro	51.7493	30.9066		13.3406	3.6999	0.0405		0.028	0.04			99.8049
Pl	735B_80R2_51	87 / 1 .	426.002	core	Ol-gabbro	51.6372	30.5413		13.7417	4.0413	0.033		0.0241	0.1527			100.171
Pl	735B_80R2_51	88 / 1 .	426.002	core	Ol-gabbro	45.9833	34.5736		17.9378	1.3645	0.0298		0.0334	0.107			100.029
Pl	735B_80R2_51	90 / 1 .	426.002	core	Ol-gabbro	51.8987	30.7373		13.2012	3.9233	0.0307		0.0298	0.0487			99.8697
Pl	735B_90R2_18	8	509.49	core	Ol-gabbro	49.8732	31.1209		14.9276	3.8543	0.0291		0.022	0.2028			100.074
Pl	735B_90R2_18	14	509.49	core	Ol-gabbro	49.907	30.8919		14.6744	3.9935	0.0392		0.0272	0.2069			99.8044
Pl	735B_90R2_18	25	509.49	core	Ol-gabbro	49.6362	31.1257		14.9204	3.8179	0.0274		0.117	0.2694			99.946
Pl	735B_90R2_18	32	509.49	core	Ol-gabbro	50.1443	31.1115		14.7001	3.8623	0.0384		0.0419	0.1362			100.109
Pl	735B_90R2_18	40	509.49	core	Ol-gabbro	48.1949	32.5223		16.3198	3.1588	0.0258		0.0015	0.1525			100.453
Pl	735B_90R2_18	41	509.49	core	Ol-gabbro	50.1435	31.2412		14.7323	4.1223	0.0423		0.0475	0.1293			100.495
Pl	735B_90R2_18	48	509.49	core	Ol-gabbro	50.3912	31.2543		14.6624	3.9325	0.0212		0.0237	0.1432			100.488
Pl	735B_90R2_18	52	509.49	core	Ol-gabbro	50.6532	31.1818		14.7741	3.782	0.0397		0.0199	0.1783			100.695
Pl	735B_90R2_18	63	509.49	core	Ol-gabbro	50.6783	31.0541		14.5784	4.1218	0.0283		0.0158	0.0994			100.628
Pl	735B_90R2_18	64	509.49	core	Ol-gabbro	49.4334	32.0101		15.6236	3.4733	0.0328		0.0027	0.163			100.779
Pl	735B_90R2_82	78	510.1	core	Ol-gabbro	47.2915	33.102		17.4196	2.396	0.0209		0.013	0.2273			100.517
Pl	735B_90R2_82	79	510.1	core	Ol-gabbro	47.3763	33.2279		17.4023	2.4641	0.023		0.0202	0.2567			100.825
Pl	735B_90R2_82	87	510.1	core	Ol-gabbro	50.1953	31.1734		14.9625	4.009	0.047		0.027	0.2728			100.729
Pl	735B_90R2_82	89	510.1	core	Ol-gabbro	49.8259	31.463		15.2372	3.5538	0.0288		0.0196	0.1338			100.321
Pl	735B_90R2_82	97	510.1	core	Ol-gabbro	48.3164	32.5182		16.4297	3.0665	0.0226		0.0019	0.0823			100.439
Pl	735B_90R2_82	103	510.1	core	Ol-gabbro	50.5085	31.1051		14.673	4.0555	0.0421		0	0.1709			100.634
Pl	735B_90R2_82	108	510.1	core	Ol-gabbro	50.5579	30.89		14.6201	3.9046	0.154		0	0.1513			100.395
Pl	735B_90R2_82	118	510.1	core	Ol-gabbro	48.8051	32.3169		16.1855	3.1893	0.0326		0.0185	0.1192			100.726
Pl	735B_90R2_82	120	510.1	core	Ol-gabbro	49.9286	31.5316		15.1732	3.8877	0.0377		0.0038	0.1738			100.788
Pl	735B_90R2_82	127	510.1	core	Ol-gabbro	48.5945	32.6021		16.2948	3.0573	0.0371		0.0231	0.1605			100.823
Pl	735B_90R2_82	136	510.1	core	Ol-gabbro	48.4073	32.6462		16.3618	3.0183	0.0253		0.0156	0.1814			100.705
Pl	735B_90R2_84	140	510.17	core	Ol-gabbro	50.581	31.3231		14.8336	3.762	0.043		0.0784	0.2686			100.947
Pl	735B_90R2_84	147	510.17	core	Ol-gabbro	48.3401	32.8265		16.6597	2.8209	0.016		0.0219	0.1899			100.928
Pl	735B_90R2_84	148	510.17	core	Ol-gabbro	49.7682	31.7129		15.3383	3.7601	0.0409		0.019	0.1718			100.865
Pl	735B_90R2_84	149	510.17	core	Ol-gabbro	49.9435	31.614		15.0809	3.6104	0.0429		0.0765	0.3058			100.778
Pl	735B_90R2_84	202	510.17	core	Ol-gabbro	48.4183	32.3064		16.4416	3.2126	0.0205		0.0266	0.1836			100.668
Pl	735B_90R2_84	217	510.17	core	Ol-gabbro	49.369	31.6916		15.4671	3.4107	0.032		0.0119	0.1657			100.174
Pl	735B_90R2_94B	2	510.27	core	Ol-gabbro	50.7031	30.9557		13.6386	3.9095	0.0287		0.0055	0.13			99.4049
Pl	735B_90R2_94B	11	510.27	core	Ol-gabbro	50.3372	31.395		14.0511	3.8662	0.0281		0.0184	0.1906			99.9336
Pl	735B_90R2_94B	15	510.27	core	Ol-gabbro	49.125	32.1637		15.2571	3.4306	0.025		0.0042	0.1335			100.186
Pl	735B_90R2_94B	17	510.27	core	Ol-gabbro	48.8976	32.4441		15.2983	3.3405	0.0277		0.032	0.1092			100.218
Pl	735B_90R2_94B	19	510.27	core	Ol-gabbro	48.8733	32.7231		15.5636	3.0986	0.0217		0.0004	0.1227			100.461
Pl	735B_90R2_94B	22	510.27	core	Ol-gabbro	48.813	32.277		15.2785	3.323	0.0205		0.0029	0.1069			99.8929
Pl	735B_90R2_94B	31	510.27	core	Ol-gabbro	50.2839	31.0449		13.9669	4.1886	0.0202		0.045	0.2385			99.8731
Pl	735B_90R2_94B	37	510.27	core	Ol-gabbro	50.3668	30.987		13.863	4.0256	0.0306		0.0331	0.2432			99.6098
Pl	735B_90R2_94B	38	510.27	core	Ol-gabbro	48.976	31.8597		15.3271	3.196	0.015		0.0177	0.156			99.567
Pl	735B_90R2_94B	44	510.27	core	Ol-gabbro	47.7012	32.7902		16.0733	2.7499	0.0304		0.0802	0.3619			99.843
Pl	735B_90R2_94B	58	510.27	core	Ol-gabbro	45.9922	34.4033		17.66	1.7139	0.0067		0.0342	0.2195			100.048
Pl	735B_90R2_94B	63	510.27	core	Ol-gabbro	49.676	31.6135		14.5522	3.5543	0.0257		0.0208	0.1204			99.6218
Pl	735B_90R2_94B	65	510.27	core	Ol-gabbro	48.7207	32.214		15.4712	3.1191	0.0149		0.0134	0.1302			99.6987
Pl	735B_90R2_94B	67	510.27	core	Ol-gabbro	50.3314	31.29		14.2415	3.7975	0.0391		0.0425	0.1529			99.9247
Pl	735B_90R2_94B	7	510.27	core	Ol-gabbro	50.1616	31.5603		14.3379	3.7044	0.0243		0.0563	0.1256			100.032
Pl	735B_90R2_94B	9	510.27	core	Ol-gabbro	50.5065	31.1038		13.9515	4.0009	0.0355		0.0304	0.1281			99.8106
Pl	735B_90R2_123	77	510.56	core	Ol-gabbro	49.1812	32.0702		15.1435	3.2618	0.0246		0.0211	0.1122			99.8793
Pl	735B_90R2_123	87	510.56	core	Ol-gabbro	48.059	32.847		16.0309	2.74	0.0186		0.0409	0.1186			99.929
Pl	735B_90R2_123	92	510.56	core	Ol-gabbro	49.3163	32.3887		15.1754	3.2597	0.0418		0.0276	0.1284			100.398
Pl	735B_90R2_123	107	510.56	core	Ol-gabbro	48.9255	32.3228		15.2869	3.0933	0.0301		0.018	0.0911			99.814
Pl	735B_90R2_123	109	510.56	core	Ol-gabbro	48.3272	32.6846		15.9759	2.7976	0.0179		0.0172	0.1297			100.004
Pl	735B_90R2_123	110	510.56	core	Ol-gabbro	46.6643	33.8247		17.1274	2.2052	0.0127		0.0126	0.105			99.9818
Pl	735B_90R2_123	129	510.56	core	Ol-gabbro	48.6703	32.2656		15.3912	3.1728	0.0263		0.0085	0.1251			99.714
Pl	735B_90R2_123	135	510.56	core	Ol-gabbro	50.6582	31.2679		14.1085	3.9291	0.0353		0.0247	0.1612			100.213
Pl	735B_90R2_123	143	510.67	core	Ol-gabbro	49.2094	32.2262		15.2135	3.2344	0.0303		0.1516	0.2017			100.317
Pl	735B_90R2_123	178	510.67	core	Ol-gabbro	50.1114	31.4571		14.3836	3.7289	0.0319		0.1192	0.4018			100.276
Pl	735B_90R2_123	179	510.67	core	Ol-gabbro	50.1912	31.2574		14.3157	3.8936	0.0456		0.0424	0.2746			100.071
Pl	735B_90R2_123	209	510.67	core	Ol-gabbro	49.4839	31.7179		15.1008	3.147	0.0238		0.0337	0.2265			99.7767
Pl	735B_90R3_6	14	510.84	core	Ol-gabbro	48.7904	32.4057		15.3496	3.1596	0.0246		0.0399	0.1172			99.9631
Pl	735B_90R3_6	16	510.84	core	Ol-gabbro	49.6103	31.7363		14.645	3.5344	0.0263		0.0248	0.1322			99.7466
Pl	735B_90R3_6	18	510.84	core	Ol-gabbro	50.5032	31.4407		14.2558	3.6649	0.0393		0.0239	0.1891			100.161
Pl	735B_90R3_6	24	510.84	core	Ol-gabbro	50.5098	31.1643		14.06	3.8204	0.0644		0.2016	0.2077			100.102
Pl	735B_90R3_6	28	510.84	core	Ol-gabbro	49.9647	31.5883		14.6126	3.746	0.0308		0.04	0.1191			100.127
Pl	735B_90R3_6	32	510.84	core	Ol-gabbro	49.4581	31.7805		14.9365	3.2128	0.0253		0.0084	0.1351			99.6016
Pl	735B_90R3_6	37	510.84	core	Ol-gabbro	50.1072	31.502		14.4796	3.7361	0.0256		0.0409	0.1298			100.092
Pl	735B_90R3_6	44	510.84	core	Ol-gabbro	47.7327	31.9396		15.9008	2.9142	0.0264		0.0904	0.1294			98.8032
Pl	735B_90R3_6	50	510.84	core	Ol-gabbro	47.6765	32.9381		16.233	2.6783	0.0132		0.0107	0.1551			99.7457
Pl	735B_90R3_6	51	510.84	core	Ol-gabbro	47.8818	32.8634		16.0757	2.8286	0.0188		0.0284	0.1483			99.8912
Pl	735B_90R3_6	58	510.84	core	Ol-gabbro	48.1701	32.6362		15.8415	2.8443	0.0196		0.0295	0.1374			99.7053
Pl	735B_90R3_6	62	510.84	core	Ol-gabbro	49.3021	32.0662		15.0611	3.3978	0.008		0	0.0631			99.9111
Pl	735B_90R3_6	65	510.84	core	Ol-gabbro	49.8803	31.5013		14.482	3.7725	0.0286		0.0235	0.1825			99.9375
Pl	735B_90R3_6	70	510.84	core	Ol-gabbro	49.2442	32.0663		14.9243	3.3829	0.019		0.0134	0.1619			99.8901
Pl	735B_80R1_136	91 / 1 .	425.363	rim	Ol-gabbro	59.4383	25.5359		7.3932	7.3196	0.12		0.0036	0.144			99.9546
Pl	735B_80R1_136	103 / 1 .	425.37	rim	Ol-gabbro	58.8184	26.0242		8.0013	7.2564	0.0752		0.0036	0.2502			100.429
Pl	735B_80R1_136	114 / 1 .	425.372	rim	Ol-gabbro	58.7016	26.3393		7.9794	7.0828	0.0671		0.0054	0.1892			100.365
Pl	735B_80R1_136	117 / 1 .	425.372	rim	Ol-gabbro	56.0603	27.7787		9.9219	5.9505	0.0436		0	0.2086			99.9636
Pl	735B_80R1_136	120 / 1 .	425.374	rim	Ol-gabbro	50.9366	30.4229		13.6689	3.9685	0.0268		0.014	0.1474			99.1851
Pl	735B_80R1_136	123 / 1 .	425.374	rim	Ol-gabbro	50.2058	31.4255		14.5477	3.3047	0.0485		0.0079	0.1499			99.69
Pl	735B_80R1_136	131 / 1 .	425.38	rim	Ol-gabbro	50.9307	31.4091		13.7997	3.8085	0.0351		0.023	0.0803			100.086
Pl	735B_80R1_136	134 / 1 .	425.38	rim	Ol-gabbro	50.5992	31.095		14.1187	3.577	0.0364		0.0009	0.0401			99.4673
Pl	735B_80R1_136	135 / 1 .	425.38	rim	Ol-gabbro	49.5232	32.1891		14.9622	3.0938	0.0324		0	0.1948			99.9955
Pl	735B_80R1_136	141 / 1 .	425.382	rim	Ol-gabbro	50.0302	31.7796		15.0129	3.2763	0.0374		0.0149	0.1077			100.259
Pl	735B_80R1_136	147 / 1 .	425.384	rim	Ol-gabbro	50.4289	31.401		14.1841	3.5131	0.0944		0.0697	0.1366			99.8278
Pl	735B_80R1_136	148 / 1 .	425.384	rim	Ol-gabbro	50.5617	31.1281		14.2277	3.4631	0.035		0	0.1253			99.5409
Pl	735B_80R1_136	157 / 1 .	425.39	rim	Ol-gabbro	49.0855	32.3264		15.1501	2.9409	0.0175		0	0.0605			99.6189
Pl	735B_80R1_136	160 / 1 .	425.389	rim	Ol-gabbro	47.9231	33.091		16.6291	2.2224	0.0054		0.0035	0.1034			99.9779
Pl	735B_80R1_136	161 / 1 .	425.389	rim	Ol-gabbro	51.2149	30.933		13.7801	3.7702	0.0337		0	0.0915			99.8234
Pl	735B_80R1_136	162 / 1 .	425.389	rim	Ol-gabbro	51.1698	30.8988		13.786	3.6594	0.0482		0.0289	0.1306			99.7217
Pl	735B_80R1_136	164 / 1 .	425.389	rim	Ol-gabbro	48.6781	32.4594		15.5584	2.6258	0.0322		0.0114	0.0753			99.4406
Pl	735B_80R1_136	170 / 1 .	425.387	rim	Ol-gabbro	49.8909	32.0665		15.089	3.2033	0.0175		0.0106	0.112			100.39
Pl	735B_81R5_7	9 / 1 .	439.245	rim	Ol-gabbro	49.8821	32.1884		14.6775	3.2308	0		0.0009	0.0689			100.049
Pl	735B_81R5_7	13 / 1 .	439.246	rim	Ol-gabbro	52.3896	30.0634		12.8077	4.1629	0.0502		0	0.0981			99.5719
Pl	735B_81R5_7	31 / 1 .	439.247	rim	Ol-gabbro	50.0026	31.9118		14.7403	3.2137	0.0283		0.044	0.126			100.067
Pl	735B_81R5_7	32 / 1 .	439.247	rim	Ol-gabbro	49.7	32.0345		14.954	3.1136	0.0108		0.007	0.126			99.9459
Pl	735B_81R5_7	33 / 1 .	439.247	rim	Ol-gabbro	49.9953	31.9127		14.7598	3.1202	0.0363		0.0185	0.0957			99.9385
Pl	735B_81R5_7	46 / 1 .	439.252	rim	Ol-gabbro	52.4115	29.9623		12.9001	4.1996	0.027		0.0257	0.133			99.6592
Pl	735B_81R5_7	48 / 1 .	439.253	rim	Ol-gabbro	52.8072	30.171		12.5567	4.3215	0.0149		0.0256	0.1125			100.009
Pl	735B_81R5_7	49 / 1 .	439.253	rim	Ol-gabbro	52.484	29.9812		12.621	4.4676	0.0486		0.0133	0.097			99.7127
Pl	735B_81R5_7	59 / 1 .	439.257	rim	Ol-gabbro	52.3289	30.0096		13.0629	4.1741	0.042		0.0115	0.0819			99.7109
Pl	735B_81R5_7	62 / 1 .	439.257	rim	Ol-gabbro	53.0646	29.3482		12.2353	4.4571	0.042		0.0177	0.1796			99.3445
Pl	735B_81R5_7	73 / 1 .	439.264	rim	Ol-gabbro	52.9572	30.0144		12.5637	4.6254	0.0391		0.0203	0.0981			100.318
Pl	735B_81R5_7	74 / 1 .	439.264	rim	Ol-gabbro	52.7945	30.3005		12.8174	4.3537	0.0311		0.0266	0.1345			100.458
Pl	735B_81R5_7	84 / 1 .	439.262	rim	Ol-gabbro	53.1368	29.5118		12.0754	4.5266	0.0406		0.0293	0.1317			99.4522
Pl	735B_79R3_100	6 / 1 .	418.507	rim	Ol-gabbro	51.3628	30.6751		13.8216	3.7613	0.0283		0.0344	0.0816			99.7651
Pl	735B_79R3_100	8 / 1 .	418.507	rim	Ol-gabbro	49.823	32.0812		15.115	3.2322	0.0175		0.0317	0.1054			100.406
Pl	735B_79R3_100	26 / 1 .	418.503	rim	Ol-gabbro	50.5931	31.4089		14.2418	3.4025	0.0323		0.0739	0.3348			100.087
Pl	735B_79R3_100	27 / 1 .	418.503	rim	Ol-gabbro	51.9795	30.6765		13.373	4.1513	0.0431		0.0247	0.0667			100.315
Pl	735B_79R3_100	29 / 1 .	418.503	rim	Ol-gabbro	51.3459	30.6976		13.9491	3.7539	0.0268		0.0009	0.0967			99.8709
Pl	735B_79R3_100	41 / 1 .	418.515	rim	Ol-gabbro	51.4169	30.5587		13.5232	3.9851	0.0498		0.0291	0.1046			99.6674
Pl	735B_79R3_100	44 / 1 .	418.515	rim	Ol-gabbro	51.5429	30.8658		13.7884	4.0037	0.0283		0.0432	0.1586			100.431
Pl	735B_79R3_100	55 / 1 .	418.524	rim	Ol-gabbro	49.4026	32.3816		15.2174	2.9315	0.0485		0	0.1261			100.108
Pl	735B_79R3_100	56 / 1 .	418.524	rim	Ol-gabbro	52.5992	30.1767		13.1549	4.1672	0.0202		0.0425	0.1857			100.346
Pl	735B_79R3_100	57 / 1 .	418.524	rim	Ol-gabbro	52.2147	30.3736		12.9255	4.2926	0.0271		0.016	0.1374			99.9869
Pl	735B_79R3_100	64 / 1 .	418.526	rim	Ol-gabbro	51.0147	30.8304		13.7659	3.6796	0.0216		0.0442	0.1725			99.5289
Pl	735B_79R3_100	66 / 1 .	418.526	rim	Ol-gabbro	51.0528	31.2919		14.1117	3.4142	0.0297		0.0398	0.0988			100.039
Pl	735B_79R3_100	73 / 1 .	418.532	rim	Ol-gabbro	51.6618	30.8789		13.8892	3.9485	0.0135		0.0292	0.0769			100.498
Pl	735B_79R3_100	75 / 1 .	418.532	rim	Ol-gabbro	51.3714	30.4881		13.6008	3.9861	0.0161		0.059	0.1701			99.6916
Pl	735B_76R3_96	47 / 1 .	397.581	rim	Ol-gabbro	52.7353	30.024		12.7895	4.4966	0.0674		0.0329	0.156			100.302
Pl	735B_76R3_96	48 / 1 .	397.581	rim	Ol-gabbro	53.9348	29.7226		12.1659	4.5895	0.0385		0.0169	0.1079			100.576
Pl	735B_76R3_96	49 / 1 .	397.581	rim	Ol-gabbro	53.0752	29.7308		12.8624	4.4006	0.0509		0.0383	0.2121			100.37
Pl	735B_76R3_96	57 / 1 .	397.583	rim	Ol-gabbro	53.0333	29.8809		12.4302	4.4329	0.0373		0.0258	0.1426			99.983
Pl	735B_76R3_96	59 / 1 .	397.587	rim	Ol-gabbro	50.594	31.0895		14.0852	3.4453	0.0238		0	0.2259			99.4637
Pl	735B_76R3_96	61 / 1 .	397.587	rim	Ol-gabbro	53.5005	29.1764		12.2124	4.7617	0.0248		0.0062	0.1735			99.8555
Pl	735B_76R3_96	70 / 1 .	397.587	rim	Ol-gabbro	53.0576	30.4207		12.7531	4.3726	0.0399		0.036	0.1742			100.854
Pl	735B_76R3_96	72 / 1 .	397.587	rim	Ol-gabbro	53.0164	29.5036		12.4006	4.4115	0.0173		0.0335	0.1762			99.5591
Pl	735B_76R3_96	81 / 1 .	397.585	rim	Ol-gabbro	53.162	29.3225		11.9537	4.5563	0.0378		0.0652	0.2781			99.3756
Pl	735B_76R3_96	89 / 1 .	397.576	rim	Ol-gabbro	52.939	29.9534		12.5888	4.4562	0.0206		0.0115	0.1395			100.109
Pl	735B_76R3_96	90 / 1 .	397.576	rim	Ol-gabbro	53.0921	29.5851		12.2273	4.444	0.055		0.0231	0.2517			99.6783
Pl	735B_76R3_96	102 / 1 .	397.577	rim	Ol-gabbro	52.804	29.8342		12.3835	4.418	0.0441		0.0445	0.2396			99.7679
Pl	735B_76R3_96	108 / 1 .	397.575	rim	Ol-gabbro	52.7404	29.5496		12.5443	4.5384	0.0551		0.0116	0.1705			99.6099
Pl	735B_76R3_96	113 / 1 .	397.572	rim	Ol-gabbro	53.0799	29.972		12.7139	4.2753	0.033		0.0275	0.2134			100.315
Pl	735B_76R3_96	121 / 1 .	397.562	rim	Ol-gabbro	53.1623	29.8166		12.3555	4.3568	0.0503		0.0197	0.1702			99.9314
Pl	735B_79R4_20	108 / 1 .	419.152	rim	Ol-gabbro	50.6973	31.996		14.2046	3.4078	0.0263		0.0034	0.0624			100.398
Pl	735B_79R4_20	110 / 1 .	419.152	rim	Ol-gabbro	51.1151	31.3665		14.5262	3.3951	0.0028		0	0.0719			100.478
Pl	735B_79R4_20	116 / 1 .	419.157	rim	Ol-gabbro	51.8715	31.0782		13.8882	3.9062	0.0221		0	0.0965			100.863
Pl	735B_79R4_20	118 / 1 .	419.157	rim	Ol-gabbro	51.4934	31.2504		13.9938	3.4312	0.0302		0	0.0562			100.255
Pl	735B_79R4_20	2 / 1 .	419.159	rim	Ol-gabbro	50.9637	31.3664		14.0502	3.484	0.0185		0.0043	0.0911			99.9782
Pl	735B_79R4_20	4 / 1 .	419.159	rim	Ol-gabbro	51.7319	31.1382		13.518	3.677	0		0.0124	0.033			100.111
Pl	735B_79R4_20	27 / 1 .	419.159	rim	Ol-gabbro	49.8092	31.9575		15.3048	2.8789	0.0144		0.0152	0.1446			100.125
Pl	735B_79R4_20	29 / 1 .	419.159	rim	Ol-gabbro	52.1547	30.6956		13.3292	4.1507	0.0439		0.0053	0.0487			100.428
Pl	735B_79R4_20	30 / 1 .	419.159	rim	Ol-gabbro	51.9563	30.6617		13.344	3.9865	0.0137		0.0089	0.0974			100.068
Pl	735B_79R4_20	45 / 1 .	419.163	rim	Ol-gabbro	51.1245	31.1135		14.0144	3.5327	0.0014		0.0247	0.0871			99.8983
Pl	735B_79R4_20	47 / 1 .	419.163	rim	Ol-gabbro	49.473	32.412		15.2826	2.778	0.0178		0.0044	0.0343			100.002
Pl	735B_79R4_20	49 / 1 .	419.163	rim	Ol-gabbro	51.9025	30.2875		13.4958	3.7918	0.0119		0	0.076			99.5655
Pl	735B_79R4_20	57 / 1 .	419.168	rim	Ol-gabbro	50.844	31.5441		14.3102	3.8036	0.0412		0.0257	0.0925			100.661
Pl	735B_79R4_20	59 / 1 .	419.168	rim	Ol-gabbro	51.5949	30.9583		13.5965	3.8261	0.0198		0.017	0.0351			100.048
Pl	735B_79R4_20	73 / 1 .	419.172	rim	Ol-gabbro	51.3447	31.319		13.5731	3.6993	0.0171		0	0.1006			100.054
Pl	735B_79R4_20	74 / 1 .	419.172	rim	Ol-gabbro	51.8308	30.6961		13.3207	3.9866	0.0193		0.0106	0.0086			99.8727
Pl	735B_79R4_20	77 / 1 .	419.172	rim	Ol-gabbro	51.1346	31.3528		14.0163	3.6318	0.0335		0.0153	0.0335			100.218
Pl	735B_79R4_20	84 / 1 .	419.174	rim	Ol-gabbro	51.5132	30.7486		13.2319	4.06	0.0316		0.0257	0.038			99.649
Pl	735B_83R7_43B	7 / 1 .	461.682	rim	Ol-gabbro	51.6919	30.9445		13.9159	3.8339	0.0111		0.0036	0.1024			100.503
Pl	735B_83R7_43B	9 / 1 .	461.682	rim	Ol-gabbro	50.0862	32.1538		15.1778	3.0384	0.0287		0.0076	0.0656			100.558
Pl	735B_83R7_43B	10 / 1 .	461.682	rim	Ol-gabbro	49.1273	32.7372		15.7631	2.6772	0.0326		0	0.0833			100.421
Pl	735B_83R7_43B	12 / 1 .	461.682	rim	Ol-gabbro	50.9183	31.8701		14.1633	3.2789	0		0.0168	0.1344			100.382
Pl	735B_83R7_43B	14 / 1 .	461.684	rim	Ol-gabbro	50.9581	31.8442		14.2765	3.5006	0.0248		0.016	0.124			100.744
Pl	735B_83R7_43B	20 / 1 .	461.697	rim	Ol-gabbro	50.2804	32.2867		14.9368	3.0421	0		0.008	0.0381			100.592
Pl	735B_83R7_43B	21 / 1 .	461.697	rim	Ol-gabbro	51.9148	31.034		13.5748	3.9989	0.0041		0.0071	0.0846			100.618
Pl	735B_83R7_43B	25 / 1 .	461.697	rim	Ol-gabbro	49.8834	32.1806		14.9431	3.0504	0.0347		0.0375	0.0507			100.18
Pl	735B_83R7_43B	37 / 1 .	461.701	rim	Ol-gabbro	49.8588	32.377		15.2513	2.9667	0.0591		0.047	0.0992			100.659
Pl	735B_83R7_43B	39 / 1 .	461.701	rim	Ol-gabbro	50.3724	32.2891		14.974	3.0267	0.0354		0.0457	0.1427			100.886
Pl	735B_83R7_43B	40 / 1 .	461.701	rim	Ol-gabbro	50.8038	31.8017		14.5283	3.4062	0		0	0.1416			100.682
Pl	735B_83R7_43B	47 / 1 .	461.7	rim	Ol-gabbro	52.2521	30.4913		13.2614	4.0615	0.0259		0.0176	0.0753			100.185
Pl	735B_83R7_43B	58 / 1 .	461.702	rim	Ol-gabbro	49.8302	32.4581		15.1358	2.9907	0.0262		0	0.1			100.541
Pl	735B_83R7_43B	67 / 1 .	461.692	rim	Ol-gabbro	51.7816	31.1678		13.5751	3.9666	0.0302		0.0093	0.1279			100.658
Pl	735B_83R7_43B	71 / 1 .	461.69	rim	Ol-gabbro	50.148	31.9425		14.9868	3.1538	0.0419		0.0059	0.0588			100.338
Pl	735B_83R7_43B	79 / 1 .	461.688	rim	Ol-gabbro	52.2023	30.7299		13.3883	4.0665	0.0471		0.0194	0.0743			100.528
Pl	735B_83R7_43B	81 / 1 .	461.688	rim	Ol-gabbro	51.1933	31.2042		14.2231	3.5841	0.0275		0.0051	0.1463			100.384
Pl	735B_83R7_43B	85 / 1 .	461.684	rim	Ol-gabbro	50.9418	31.4107		14.3602	3.5466	0.0493		0.015	0.08			100.404
Pl	735B_83R7_43B	88 / 1 .	461.684	rim	Ol-gabbro	51.7623	30.7693		13.4129	3.808	0.0275		0.0018	0.1103			99.8921
Pl	735B_83R7_43B	89 / 1 .	461.684	rim	Ol-gabbro	52.3024	30.4361		12.6487	4.3395	0.0605		0.0098	0.0522			99.8492
Pl	735B_83R7_43B	98 / 1 .	461.69	rim	Ol-gabbro	50.8929	31.4058		14.2102	3.4181	0.0274		0	0.0774			100.032
Pl	735B_83R7_43B	107 / 1 .	461.689	rim	Ol-gabbro	50.6684	31.6928		14.6336	3.3257	0.0082		0.0168	0.1493			100.495
Pl	735B_80R2_51	10 / 1 .	425.987	rim	Ol-gabbro	50.524	30.8843		14.1801	3.5635	0.0186		0.0509	0.086			99.3074
Pl	735B_80R2_51	11 / 1 .	425.987	rim	Ol-gabbro	50.3322	31.6365		14.609	3.2335	0.0328		0.0366	0.1688			100.049
Pl	735B_80R2_51	12 / 1 .	425.987	rim	Ol-gabbro	50.1113	31.7117		14.7669	3.2058	0.0466		0.0222	0.0724			99.9369
Pl	735B_80R2_51	25 / 1 .	425.992	rim	Ol-gabbro	51.4847	30.845		13.7445	3.6493	0.0198		0.024	0.0689			99.8362
Pl	735B_80R2_51	27 / 1 .	425.992	rim	Ol-gabbro	50.8992	30.9534		13.9138	3.6375	0.0422		0	0.1081			99.5542
Pl	735B_80R2_51	28 / 1 .	425.992	rim	Ol-gabbro	51.6651	31.1664		13.8267	3.9418	0.0315		0.0154	0.0809			100.728
Pl	735B_80R2_51	43 / 1 .	425.999	rim	Ol-gabbro	51.3026	30.7637		13.7764	3.6924	0.0538		0.0196	0.2232			99.8317
Pl	735B_80R2_51	46 / 1 .	425.999	rim	Ol-gabbro	51.8176	30.5785		13.6323	3.8763	0.0655		0.0374	0.0984			100.106
Pl	735B_80R2_51	64 / 1 .	425.994	rim	Ol-gabbro	51.4077	30.8929		13.4231	3.8524	0.0223		0.0281	0.1702			99.7967
Pl	735B_80R2_51	67 / 1 .	425.996	rim	Ol-gabbro	52.1131	30.2956		13.3334	3.9486	0.0389		0.0298	0.084			99.8434
Pl	735B_80R2_51	69 / 1 .	425.996	rim	Ol-gabbro	50.573	31.617		14.2103	3.4457	0.046		0.01	0.3125			100.215
Pl	735B_80R2_51	70 / 1 .	425.996	rim	Ol-gabbro	51.5268	30.8886		13.7333	3.7573	0.0393		0.0247	0.0876			100.058
Pl	735B_80R2_51	89 / 1 .	426.002	rim	Ol-gabbro	51.4911	30.9391		13.7196	3.7663	0.0165		0.0125	0.1024			100.047
Pl	735B_90R2_18	7	509.49	rim	Ol-gabbro	47.7982	32.6812		16.3697	2.8942	0.0201		0.013	0.1488			99.9939
Pl	735B_90R2_18	9	509.49	rim	Ol-gabbro	48.7399	32.1647		15.8156	3.4104	0.0176		0	0.1461			100.314
Pl	735B_90R2_18	13	509.49	rim	Ol-gabbro	50.0644	31.274		14.679	3.8261	0.0428		0.0251	0.1812			100.142
Pl	735B_90R2_18	17	509.49	rim	Ol-gabbro	49.4417	31.9436		15.5399	3.5486	0.0326		0.014	0.1435			100.724
Pl	735B_90R2_18	24	509.49	rim	Ol-gabbro	50.0182	31.1641		14.9712	3.9418	0.0308		0.0173	0.1778			100.373
Pl	735B_90R2_18	26	509.49	rim	Ol-gabbro	49.2664	31.6793		15.3332	3.6582	0.0311		0.0442	0.1932			100.267
Pl	735B_90R2_18	31	509.49	rim	Ol-gabbro	49.9968	31.3045		14.8269	3.9449	0.0241		0.0289	0.1639			100.373
Pl	735B_90R2_18	33	509.49	rim	Ol-gabbro	49.2792	31.934		15.5687	3.4624	0.0291		0.0073	0.1536			100.446
Pl	735B_90R2_18	39	509.49	rim	Ol-gabbro	48.7645	32.1476		16.0088	3.3429	0.0341		0.0123	0.166			100.504
Pl	735B_90R2_18	42	509.49	rim	Ol-gabbro	49.9235	31.3756		15.142	3.777	0.036		0.0374	0.2635			100.585
Pl	735B_90R2_18	47	509.49	rim	Ol-gabbro	50.4392	30.9663		14.4676	3.9835	0.0335		0.0301	0.1828			100.146
Pl	735B_90R2_18	49	509.49	rim	Ol-gabbro	50.7375	30.8181		14.4263	3.9881	0.0159		0.0038	0.1432			100.227
Pl	735B_90R2_18	51	509.49	rim	Ol-gabbro	48.718	32.4476		16.0609	3.1395	0.0082		0.0021	0.0843			100.477
Pl	735B_90R2_18	59	509.49	rim	Ol-gabbro	49.0153	31.6617		15.414	3.5052	0.0203		0.0467	0.1891			99.923
Pl	735B_90R2_18	62	509.49	rim	Ol-gabbro	48.711	32.2728		16.0118	3.2934	0.0343		0.0238	0.1232			100.551
Pl	735B_90R2_18	65	509.49	rim	Ol-gabbro	48.5406	32.2044		16.0593	3.2525	0.031		0.0158	0.2156			100.328
Pl	735B_90R2_82	66	510.1	rim	Ol-gabbro	50.0806	29.4529		13.1151	3.4759	0.0395		2.5523	0.4365			99.2289
Pl	735B_90R2_82	88	510.1	rim	Ol-gabbro	48.4969	32.3008		16.2701	3.0568	0.0303		0.0019	0.1606			100.351
Pl	735B_90R2_82	96	510.1	rim	Ol-gabbro	46.2399	33.8617		18.0483	2.1349	0.0149		0.0099	0.2021			100.533
Pl	735B_90R2_82	102	510.1	rim	Ol-gabbro	48.0683	32.7995		16.6623	2.8659	0.0282		0.0023	0.1143			100.569
Pl	735B_90R2_82	107	510.1	rim	Ol-gabbro	48.9711	32.2698		16.071	3.2366	0.0213		0.01	0.1339			100.782
Pl	735B_90R2_82	119	510.1	rim	Ol-gabbro	47.3534	32.7633		17.0527	2.5899	0.0158		0.0454	0.1383			99.9869
Pl	735B_90R2_82	121	510.1	rim	Ol-gabbro	50.299	31.4422		14.85	3.8898	0.039		0	0.1576			100.72
Pl	735B_90R2_82	135	510.1	rim	Ol-gabbro	49.4931	31.7714		15.4535	3.6659	0.0419		0.0216	0.1331			100.642
Pl	735B_90R2_84	139	510.17	rim	Ol-gabbro	48.8664	32.0017		15.8943	3.2918	0.0182		0.0249	0.1386			100.276
Pl	735B_90R2_84	141	510.17	rim	Ol-gabbro	48.7679	32.409		16.0569	3.1695	0.0315		0.0249	0.1767			100.686
Pl	735B_90R2_84	155	510.17	rim	Ol-gabbro	48.5524	32.4031		16.2927	3.0585	0.0129		0	0.1525			100.515
Pl	735B_90R2_84	196	510.17	rim	Ol-gabbro	49.0783	32.3063		16.0187	3.1507	0.0131		0.035	0.141			100.8
Pl	735B_90R2_84	210	510.17	rim	Ol-gabbro	49.2371	31.8711		15.6939	3.4485	0.019		0.0069	0.1213			100.438
Pl	735B_90R2_84	216	510.17	rim	Ol-gabbro	49.3333	31.9597		15.5781	3.5073	0.0265		0.027	0.189			100.647
Pl	735B_90R2_94B	1	510.27	rim	Ol-gabbro	47.3617	33.3631		16.3707	2.5652	0.0082		0	0.1722			99.8851
Pl	735B_90R2_94B	10	510.27	rim	Ol-gabbro	49.0936	32.5462		15.3076	3.2163	0.0283		0.0004	0.1413			100.348
Pl	735B_90R2_94B	14	510.27	rim	Ol-gabbro	48.4451	32.7506		15.7314	3.0435	0.0182		0.0017	0.1402			100.156
Pl	735B_90R2_94B	16	510.27	rim	Ol-gabbro	49.2485	32.3101		15.0399	3.3631	0.0195		0	0.1075			100.131
Pl	735B_90R2_94B	18	510.27	rim	Ol-gabbro	49.184	32.3799		15.2518	3.3092	0.0265		0	0.1573			100.361
Pl	735B_90R2_94B	23	510.27	rim	Ol-gabbro	49.0204	32.4127		15.3552	3.2136	0.0126		0.0181	0.1165			100.18
Pl	735B_90R2_94B	29	510.27	rim	Ol-gabbro	47.5324	33.0459		16.2571	2.7611	0.0113		0.0269	0.1867			99.8581
Pl	735B_90R2_94B	30	510.27	rim	Ol-gabbro	48.4854	32.4622		15.4855	3.1899	0.0212		0.0156	0.1171			99.8088
Pl	735B_90R2_94B	36	510.27	rim	Ol-gabbro	46.189	34.1979		17.3469	2.071	0.0026		0	0.1413			99.9708
Pl	735B_90R2_94B	43	510.27	rim	Ol-gabbro	49.2091	32.0067		15.1746	3.3061	0.0108		0.0286	0.1606			99.991
Pl	735B_90R2_94B	62	510.27	rim	Ol-gabbro	47.9305	32.9097		16.1337	2.665	0.0154		0.0107	0.1044			99.7694
Pl	735B_90R2_94B	64	510.27	rim	Ol-gabbro	47.0577	33.5421		16.8371	2.3443	0.0161		0	0.1245			99.9304
Pl	735B_90R2_94B	66	510.27	rim	Ol-gabbro	48.0322	32.6408		15.8089	2.8389	0.0166		0.0203	0.1824			99.5486
Pl	735B_90R2_94B	6	510.27	rim	Ol-gabbro	49.4579	31.8754		14.9442	3.5284	0.0186		0.0324	0.169			100.041
Pl	735B_90R2_94B	8	510.27	rim	Ol-gabbro	48.8754	31.9392		14.924	3.4989	0.0201		0.0385	0.1431			99.4586
Pl	735B_90R2_123	76	510.56	rim	Ol-gabbro	49.5746	31.9731		14.8881	3.6499	0.0197		0.01	0.092			100.23
Pl	735B_90R2_123	86	510.56	rim	Ol-gabbro	48.125	32.8967		16.0211	2.8349	0.0199		0.0249	0.1263			100.098
Pl	735B_90R2_123	93	510.56	rim	Ol-gabbro	48.8449	32.6972		15.7162	3.0007	0.0212		0.0437	0.2141			100.573
Pl	735B_90R2_123	106	510.56	rim	Ol-gabbro	47.5345	33.1799		16.4655	2.4357	0.018		0.0168	0.1359			99.8431
Pl	735B_90R2_123	108	510.56	rim	Ol-gabbro	46.4049	33.7829		17.2312	2.0398	0.021		0.0202	0.1976			99.7299
Pl	735B_90R2_123	111	510.56	rim	Ol-gabbro	46.4909	33.8915		17.4715	1.9187	0.012		0.005	0.1314			99.9222
Pl	735B_90R2_123	117	510.56	rim	Ol-gabbro	50.0109	32.0551		14.7278	3.6089	0.0189		0.0169	0.1054			100.611
Pl	735B_90R2_123	128	510.56	rim	Ol-gabbro	46.6841	33.4072		16.9745	2.0708	0.0191		0	0.0903			99.2727
Pl	735B_90R2_123	134	510.56	rim	Ol-gabbro	47.3625	33.3381		16.5613	2.47	0.0107		0.0107	0.1344			99.9254
Pl	735B_90R2_123	142	510.67	rim	Ol-gabbro	50.4767	31.589		14.2278	3.8048	0.0318		0.0108	0.1532			100.354
Pl	735B_90R2_123	194	510.67	rim	Ol-gabbro	51.4369	30.642		13.5212	4.2601	0.027		0.0437	0.1404			100.15
Pl	735B_90R2_123	222	510.67	rim	Ol-gabbro	47.132	31.536		14.846	2.8391	0.0321		2.3664	0.4466			99.2097
Pl	735B_90R3_6	13	510.84	rim	Ol-gabbro	47.3839	33.1687		16.1922	2.5495	0.0174		0.025	0.1448			99.5158
Pl	735B_90R3_6	15	510.84	rim	Ol-gabbro	49.8997	31.8408		14.7159	3.6494	0.0321		0.0291	0.148			100.37
Pl	735B_90R3_6	17	510.84	rim	Ol-gabbro	49.3152	31.8092		14.8006	3.4795	0.0307		0.0797	0.1204			99.7063
Pl	735B_90R3_6	25	510.84	rim	Ol-gabbro	47.8669	33.1167		16.1129	2.7526	0.0139		0.0019	0.1686			100.061
Pl	735B_90R3_6	43	510.84	rim	Ol-gabbro	49.9206	31.558		14.5628	3.671	0.0154		0.0246	0.113			99.909
Pl	735B_90R3_6	49	510.84	rim	Ol-gabbro	48.6836	32.3251		15.4096	3.1283	0.0149		0.0081	0.0874			99.657
Pl	735B_90R3_6	52	510.84	rim	Ol-gabbro	48.6474	32.4925		15.6683	2.9477	0.0135		0	0.1049			99.9376
Pl	735B_90R3_6	57	510.84	rim	Ol-gabbro	48.4461	32.4316		15.6988	2.9423	0.0222		0.0219	0.1355			99.7002
Pl	735B_90R3_6	61	510.84	rim	Ol-gabbro	48.6531	32.4297		15.7077	3.029	0.0248		0.0219	0.1236			100.015
Pl	735B_90R3_6	66	510.84	rim	Ol-gabbro	48.7558	32.4845		15.6335	3.0238	0.0266		0.0344	0.1309			100.097
Pl	735B_90R3_6	71	510.84	rim	Ol-gabbro	49.1403	32.1656		15.4301	3.3225	0.0179		0.0188	0.1511			100.289
Pl	735B_83R7_130A	95 / 1 .	462.554	core	Ol-rich gabbro	51.5862	31.0099		13.6891	3.8167	0.0243		0	0.0747			100.201
Pl	735B_83R7_130A	97 / 1 .	462.554	core	Ol-rich gabbro	51.5953	31.0237		13.7535	3.5798	0		0.0397	0.0739			100.066
Pl	735B_83R7_130A	108 / 1 .	462.569	core	Ol-rich gabbro	49.8912	32.022		14.8855	3.0401	0.0482		0	0.0217			99.9087
Pl	735B_83R7_130A	109 / 1 .	462.569	core	Ol-rich gabbro	49.2983	32.3142		15.4884	2.8172	0.0148		0.0114	0.031			99.9753
Pl	735B_83R7_130A	115 / 1 .	462.568	core	Ol-rich gabbro	50.6282	31.2969		14.3246	3.4862	0.0429		0.0132	0.1723			99.9643
Pl	735B_83R7_130A	126 / 1 .	462.56	core	Ol-rich gabbro	51.2679	30.9845		13.8065	3.7404	0.0593		0.0203	0.0612			99.9401
Pl	735B_83R7_130A	128 / 1 .	462.56	core	Ol-rich gabbro	48.8531	32.665		15.7599	2.5759	0.0267		0.0201	0.0581			99.9588
Pl	735B_83R7_130A	142 / 1 .	462.56	core	Ol-rich gabbro	51.5249	30.973		13.5205	3.9212	0.0068		0.0283	0.0592			100.034
Pl	735B_83R7_130A	143 / 1 .	462.56	core	Ol-rich gabbro	49.9532	32.1517		15.0809	2.9499	0.0107		0	0.0238			100.17
Pl	735B_83R7_130A	145 / 1 .	462.553	core	Ol-rich gabbro	51.3553	31.009		13.8696	3.6472	0.0217		0.0044	0.1018			100.009
Pl	735B_83R7_130A	147 / 1 .	462.553	core	Ol-rich gabbro	51.8066	30.6833		13.6792	3.8864	0.0511		0.0062	0.0554			100.168
Pl	735B_83R7_130A	160 / 1 .	462.566	core	Ol-rich gabbro	49.513	31.9885		15.1025	2.9147	0.0523		0.0517	0.0603			99.683
Pl	735B_83R7_0	6 / 1 .	461.554	core	Ol-rich gabbro	52.5521	29.8719		13.0966	4.4178	0.0608		0.0018	0.0894			100.09
Pl	735B_83R7_0	8 / 1 .	461.554	core	Ol-rich gabbro	48.2133	32.4487		16.3881	2.574	0.0174		0.0044	0.0941			99.74
Pl	735B_83R7_0	21 / 1 .	461.568	core	Ol-rich gabbro	48.9991	32.3646		15.5095	2.9936	0.0202		0.0211	0.1197			100.028
Pl	735B_83R7_0	23 / 1 .	461.568	core	Ol-rich gabbro	51.0567	31.0586		13.9511	3.6146	0.0135		0.0079	0.0992			99.8016
Pl	735B_83R7_0	30 / 1 .	461.569	core	Ol-rich gabbro	51.6758	30.3643		13.4684	4.0422	0.0364		0.0238	0.0646			99.6755
Pl	735B_83R7_0	45 / 1 .	461.563	core	Ol-rich gabbro	51.693	30.9603		13.8413	3.8655	0.0593		0.0062	0.0809			100.507
Pl	735B_83R7_0	47 / 1 .	461.565	core	Ol-rich gabbro	49.4805	32.2472		15.1534	2.8971	0.031		0.0088	0.1035			99.9215
Pl	735B_83R7_0	60 / 1 .	461.563	core	Ol-rich gabbro	52.4775	29.7525		12.6753	4.6038	0.0457		0	0.0434			99.5982
Pl	735B_83R7_0	62 / 1 .	461.563	core	Ol-rich gabbro	49.4186	31.938		15.2103	3.0201	0.0027		0.0423	0.0704			99.7024
Pl	735B_83R7_0	64 / 1 .	461.563	core	Ol-rich gabbro	52.1244	30.4083		13.1684	4.2008	0.0486		0.0398	0.0894			100.08
Pl	735B_83R7_0	74 / 1 .	461.574	core	Ol-rich gabbro	52.1311	30.3102		12.8396	4.2545	0.0269		0.0202	0.0972			99.6797
Pl	735B_83R7_0	75 / 1 .	461.574	core	Ol-rich gabbro	52.7479	29.7946		12.7197	4.5692	0.0284		0.0151	0.0612			99.9361
Pl	735B_83R7_113A	13 / 1 .	462.4	core	Ol-rich gabbro	50.6075	31.9643		14.6338	3.116	0.0123		0	0.0272			100.361
Pl	735B_83R7_113A	15 / 1 .	462.4	core	Ol-rich gabbro	50.1686	32.4964		14.971	3.0067	0.0131		0.0008	0.0566			100.713
Pl	735B_83R7_113A	23 / 1 .	462.389	core	Ol-rich gabbro	50.0929	31.7831		14.6481	3.3337	0.0385		0.0027	0.1474			100.046
Pl	735B_83R7_113A	35 / 1 .	462.383	core	Ol-rich gabbro	50.9309	31.4517		14.4682	3.5173	0.0261		0.008	0.0496			100.452
Pl	735B_83R7_113A	37 / 1 .	462.383	core	Ol-rich gabbro	50.9441	31.2429		14.1339	3.5289	0.0137		0.0142	0.0466			99.9243
Pl	735B_83R7_113A	43 / 1 .	462.385	core	Ol-rich gabbro	50.492	32.206		14.4916	3.0239	0.0206		0.0284	0.0759			100.338
Pl	735B_83R7_113A	51 / 1 .	462.394	core	Ol-rich gabbro	51.6857	31.084		14.0446	3.8158	0.0329		0.0214	0.0523			100.737
Pl	735B_83R7_113A	52 / 1 .	462.394	core	Ol-rich gabbro	49.1051	32.5911		15.5139	2.6607	0.0055		0.0142	0.082			99.9725
Pl	735B_83R7_113A	55 / 1 .	462.399	core	Ol-rich gabbro	48.5456	33.1346		15.7749	2.4824	0		0.0179	0.0595			100.015
Pl	735B_83R7_113A	57 / 1 .	462.399	core	Ol-rich gabbro	49.1913	32.7852		15.3585	2.7015	0.0014		0.0035	0.0373			100.079
Pl	735B_83R7_113A	64 / 1 .	462.392	core	Ol-rich gabbro	51.6843	30.9657		13.8192	3.7342	0.0419		0	0.0574			100.303
Pl	735B_83R7_113A	75 / 1 .	462.395	core	Ol-rich gabbro	50.8639	31.9331		14.5022	3.3426	0		0.0483	0.0874			100.778
Pl	735B_83R7_113A	77 / 1 .	462.395	core	Ol-rich gabbro	51.1707	31.5248		14.0696	3.4602	0.021		0.0025	0.0903			100.339
Pl	735B_83R7_113A	84 / 1 .	462.394	core	Ol-rich gabbro	48.3721	33.0739		16.4289	2.3989	0		0.0042	0.0606			100.339
Pl	735B_83R7_113A	92 / 1 .	462.393	core	Ol-rich gabbro	50.4892	31.981		14.2243	3.2279	0.0362		0.0189	0.0181			99.9956
Pl	735B_83R7_113A	94 / 1 .	462.393	core	Ol-rich gabbro	49.523	32.58		15.2865	2.7608	0.0091		0.0034	0.0552			100.218
Pl	735B_91R1_93A	61 / 1 .	518.357	core	Ol-rich gabbro	49.1464	32.7582		15.627	2.7067	0.0274		0.0169	0.0909			100.374
Pl	735B_91R1_93A	62 / 1 .	518.357	core	Ol-rich gabbro	48.4047	33.0556		16.3987	2.4673	0.0191		0.0363	0.0895			100.471
Pl	735B_91R1_93A	73 / 1 .	518.357	core	Ol-rich gabbro	48.6168	32.5283		15.3363	2.5736	0.0165		0.0401	0.0799			99.1915
Pl	735B_91R1_93A	79 / 1 .	518.357	core	Ol-rich gabbro	48.8723	32.6688		15.9771	2.6228	0.018		0.0117	0.0436			100.214
Pl	735B_91R1_93A	1 / 1 .	518.35	core	Ol-rich gabbro	48.4452	32.8381		15.9268	2.4914	0.0352		0.1641	0.0812			99.982
Pl	735B_91R1_93A	2 / 1 .	518.35	core	Ol-rich gabbro	48.7212	32.4765		15.6705	2.4613	0.0232		0.0787	0.031			99.4624
Pl	735B_91R1_93A	9 / 1 .	518.345	core	Ol-rich gabbro	49.8511	32.1503		14.9699	2.8352	0.0445		0.0216	0.1563			100.029
Pl	735B_91R1_93A	10 / 1 .	518.345	core	Ol-rich gabbro	49.131	32.3854		15.5418	2.7738	0.0246		0.0116	0.3046			100.173
Pl	735B_91R1_93A	12 / 1 .	518.345	core	Ol-rich gabbro	48.555	32.2213		15.3755	2.6853	0.0083		0.0287	0.1219			98.996
Pl	735B_91R1_93A	14 / 1 .	518.345	core	Ol-rich gabbro	48.8749	32.6738		15.6994	2.5761	0.0123		0.0115	0.1047			99.9527
Pl	735B_91R1_93A	17 / 1 .	518.345	core	Ol-rich gabbro	49.2371	32.2076		15.224	2.7802	0.0091		0	0.0874			99.5454
Pl	735B_91R1_93A	31 / 1 .	518.343	core	Ol-rich gabbro	48.5887	33.0888		15.7466	2.4792	0.0478		0.0053	0.0973			100.054
Pl	735B_91R1_93A	32 / 1 .	518.343	core	Ol-rich gabbro	48.4899	32.7033		15.7702	2.7771	0.0123		0.0044	0.0943			99.8515
Pl	735B_91R1_93A	34 / 1 .	518.343	core	Ol-rich gabbro	49.3024	32.3526		15.4099	2.8452	0.0327		0.0161	0.1087			100.068
Pl	735B_91R1_93A	45 / 1 .	518.351	core	Ol-rich gabbro	48.3717	32.7671		15.9704	2.3488	0.0435		0.0018	0.0699			99.5732
Pl	735B_91R1_93A	57 / 1 .	518.336	core	Ol-rich gabbro	49.1485	31.9972		15.094	2.8937	0.0205		0	0.0736			99.2275
Pl	735B_91R1_93A	58 / 1 .	518.336	core	Ol-rich gabbro	49.6108	32.391		15.5042	2.7844	0		0.031	0.1464			100.468
Pl	735B_91R1_93A	74 / 1 .	518.334	core	Ol-rich gabbro	48.3943	32.7071		15.9769	2.4146	0		0.0354	0.0837			99.612
Pl	735B_91R1_93A	76 / 1 .	518.334	core	Ol-rich gabbro	49.5775	32.2368		15.3475	2.9237	0.0205		0.0585	0.1015			100.266
Pl	735B_91R1_93A	79 / 1 .	518.334	core	Ol-rich gabbro	49.3456	32.4811		15.1987	2.6374	0.026		0	0.081			99.7698
Pl	735B_91R1_93A	80 / 1 .	518.334	core	Ol-rich gabbro	49.8748	32.1876		15.1723	2.9764	0.0205		0.0336	0.0829			100.348
Pl	735B_91R1_93A	81 / 1 .	518.334	core	Ol-rich gabbro	49.2027	32.4463		15.5813	2.7243	0		0.0115	0.1066			100.073
Pl	735B_91R1_74	6 / 1 .	518.164	core	Ol-rich gabbro	48.5321	32.9337		16.0656	2.4695	0.0764		0.018	0.091			100.186
Pl	735B_91R1_74	10 / 1 .	518.164	core	Ol-rich gabbro	49.9099	31.7756		14.6048	3.1462	0.0301		0.0257	0.0365			99.5288
Pl	735B_91R1_74	11 / 1 .	518.164	core	Ol-rich gabbro	48.3779	32.0576		15.5238	2.7214	0.045		0	0.0543			98.78
Pl	735B_91R1_74	17 / 1 .	518.164	core	Ol-rich gabbro	49.1277	32.3166		15.5944	2.7775	0.0342		0.0062	0.1046			99.9612
Pl	735B_91R1_74	24 / 1 .	518.162	core	Ol-rich gabbro	49.1321	32.2423		15.3322	2.8586	0.0027		0.0009	0.091			99.6598
Pl	735B_91R1_74	26 / 1 .	518.162	core	Ol-rich gabbro	48.0044	33.0989		16.4344	2.2651	0		0.0185	0.1336			99.9549
Pl	735B_91R1_74	34 / 1 .	518.154	core	Ol-rich gabbro	49.8593	31.9647		14.8083	3.0684	0		0.0252	0.0436			99.7695
Pl	735B_91R1_74	36 / 1 .	518.154	core	Ol-rich gabbro	49.0872	32.3374		15.3304	2.8103	0.0164		0.0195	0.0985			99.6997
Pl	735B_91R1_74	41 / 1 .	518.152	core	Ol-rich gabbro	49.3748	32.5941		15.2377	2.7679	0.0109		0	0.0914			100.077
Pl	735B_91R1_74	44 / 1 .	518.152	core	Ol-rich gabbro	48.9965	32.3225		15.3238	2.7793	0.0274		0.0426	0.1512			99.6433
Pl	735B_91R1_74	53 / 1 .	518.145	core	Ol-rich gabbro	47.7661	33.0184		16.3556	2.1538	0.042		0.0238	0.0427			99.4024
Pl	735B_91R1_74	57 / 1 .	518.153	core	Ol-rich gabbro	47.7358	33.3304		16.5094	2.0929	0		0.0229	0.0658			99.7572
Pl	735B_91R1_74	58 / 1 .	518.153	core	Ol-rich gabbro	49.0968	32.4995		15.6024	2.8252	0.0492		0.0345	0.0579			100.165
Pl	735B_91R1_74	71 / 1 .	518.15	core	Ol-rich gabbro	49.3526	32.2479		15.0921	2.8235	0.0315		0.0195	0.0552			99.6223
Pl	735B_91R1_74	74 / 1 .	518.15	core	Ol-rich gabbro	48.3161	32.6367		16.1402	2.3031	0.0164		0.0195	0.0924			99.5244
Pl	735B_83R7_130A	96 / 1 .	462.554	rim	Ol-rich gabbro	49.7522	32.1614		15.2666	2.9749	0.0175		0.0114	0.0612			100.245
Pl	735B_83R7_130A	98 / 1 .	462.554	rim	Ol-rich gabbro	50.5075	31.719		14.3072	3.534	0.0189		0	0.0747			100.161
Pl	735B_83R7_130A	116 / 1 .	462.568	rim	Ol-rich gabbro	50.7457	31.774		14.5565	3.4105	0.0282		0	0.0843			100.599
Pl	735B_83R7_130A	118 / 1 .	462.568	rim	Ol-rich gabbro	49.1173	32.4409		15.6741	2.7174	0.0336		0.0035	0.0739			100.061
Pl	735B_83R7_130A	127 / 1 .	462.56	rim	Ol-rich gabbro	51.311	30.9978		13.8519	3.8235	0.0281		0.0272	0.058			100.097
Pl	735B_83R7_130A	129 / 1 .	462.56	rim	Ol-rich gabbro	50.1074	31.9653		14.8482	3.1641	0.0576		0.0271	0.0301			100.2
Pl	735B_83R7_130A	144 / 1 .	462.56	rim	Ol-rich gabbro	51.5138	31.0157		13.6355	3.8404	0.0215		0.0097	0.0884			100.125
Pl	735B_83R7_130A	146 / 1 .	462.553	rim	Ol-rich gabbro	51.0376	30.6085		13.7786	3.8135	0.0416		0.029	0.0315			99.3403
Pl	735B_83R7_130A	159 / 1 .	462.566	rim	Ol-rich gabbro	50.5657	31.5474		14.3925	3.1921	0.0337		0.0088	0.0598			99.8
Pl	735B_83R7_130A	161 / 1 .	462.566	rim	Ol-rich gabbro	50.6398	31.5235		14.646	3.2788	0.0228		0.0185	0.0948			100.224
Pl	735B_83R7_0	7 / 1 .	461.554	rim	Ol-rich gabbro	52.3838	30.2763		12.9884	4.233	0.0539		0.0221	0.1636			100.121
Pl	735B_83R7_0	9 / 1 .	461.554	rim	Ol-rich gabbro	50.8178	31.0337		14.2939	3.5042	0.0376		0.022	0.0813			99.7905
Pl	735B_83R7_0	22 / 1 .	461.568	rim	Ol-rich gabbro	49.5194	31.8982		15.2489	3.0396	0.004		0	0.1446			99.8547
Pl	735B_83R7_0	29 / 1 .	461.569	rim	Ol-rich gabbro	52.2569	30.5288		13.6443	4.022	0.0134		0.0106	0.122			100.598
Pl	735B_83R7_0	44 / 1 .	461.563	rim	Ol-rich gabbro	52.9441	30.0312		12.5948	4.5143	0.0794		0.0335	0.0841			100.281
Pl	735B_83R7_0	46 / 1 .	461.563	rim	Ol-rich gabbro	51.7962	30.3506		13.4169	4.1215	0.0108		0.0521	0.1179			99.866
Pl	735B_83R7_0	48 / 1 .	461.565	rim	Ol-rich gabbro	52.2594	30.4011		13.131	4.2677	0.0554		0.0257	0.0641			100.204
Pl	735B_83R7_0	49 / 1 .	461.565	rim	Ol-rich gabbro	52.5711	30.1583		12.7505	4.4327	0.0324		0.0115	0.0878			100.044
Pl	735B_83R7_0	61 / 1 .	461.563	rim	Ol-rich gabbro	49.6141	32.0999		15.2389	3.0934	0		0.0202	0.1519			100.218
Pl	735B_83R7_0	63 / 1 .	461.563	rim	Ol-rich gabbro	52.6329	29.8557		12.6955	4.4205	0.0647		0.0247	0.0596			99.7536
Pl	735B_83R7_0	76 / 1 .	461.574	rim	Ol-rich gabbro	52.3752	29.8236		12.8349	4.3574	0.0434		0.0044	0.0628			99.5017
Pl	735B_83R7_113A	14 / 1 .	462.4	rim	Ol-rich gabbro	50.7806	31.7419		14.3233	3.3011	0.0209		0.0568	0.1318			100.356
Pl	735B_83R7_113A	16 / 1 .	462.4	rim	Ol-rich gabbro	50.9703	31.4124		14.0412	3.3349	0.0151		0	0.0846			99.8585
Pl	735B_83R7_113A	54 / 1 .	462.399	rim	Ol-rich gabbro	51.1538	31.4726		13.9745	3.4416	0.0234		0.0285	0.0704			100.165
Pl	735B_83R7_113A	56 / 1 .	462.399	rim	Ol-rich gabbro	49.3951	32.4404		15.7434	2.6782	0.0118		0.0017	0.0814			100.352
Pl	735B_83R7_113A	65 / 1 .	462.392	rim	Ol-rich gabbro	51.8116	30.9153		13.6847	3.6356	0.0446		0.0361	0.0755			100.203
Pl	735B_83R7_113A	78 / 1 .	462.395	rim	Ol-rich gabbro	50.6731	31.8691		14.8445	3.2288	0.0403		0	0.0865			100.742
Pl	735B_83R7_113A	83 / 1 .	462.394	rim	Ol-rich gabbro	51.6132	31.4531		14.0487	3.5513	0.0236		0.0306	0.0596			100.78
Pl	735B_83R7_113A	93 / 1 .	462.393	rim	Ol-rich gabbro	51.8014	30.8966		13.4618	3.7692	0.0236		0.0017	0.1325			100.087
Pl	735B_83R7_113A	95 / 1 .	462.393	rim	Ol-rich gabbro	51.1393	31.7077		14.1746	3.3659	0.0493		0	0.1143			100.551
Pl	735B_91R1_93A	60 / 1 .	518.357	rim	Ol-rich gabbro	49.1752	32.4621		15.6397	2.668	0.0095		0.0168	0.1471			100.118
Pl	735B_91R1_93A	63 / 1 .	518.357	rim	Ol-rich gabbro	49.2998	32.7687		15.7803	2.5884	0.0292		0.0639	0.1294			100.66
Pl	735B_91R1_93A	72 / 1 .	518.357	rim	Ol-rich gabbro	49.5779	32.4497		15.2463	2.8365	0.0302		0.0089	0.0423			100.192
Pl	735B_91R1_93A	80 / 1 .	518.357	rim	Ol-rich gabbro	49.4483	32.6139		15.2695	2.9201	0.0138		0.0196	0.0791			100.364
Pl	735B_91R1_93A	3 / 1 .	518.35	rim	Ol-rich gabbro	49.2026	32.5687		15.7947	2.4228	0.0027		0.208	0			100.2
Pl	735B_91R1_93A	4 / 1 .	518.35	rim	Ol-rich gabbro	50.4277	31.449		14.575	3.0591	0.0604		0.193	0			99.7642
Pl	735B_91R1_93A	11 / 1 .	518.345	rim	Ol-rich gabbro	48.7387	32.5635		15.8717	2.4968	0.0052		0.0254	0.1301			99.8314
Pl	735B_91R1_93A	13 / 1 .	518.345	rim	Ol-rich gabbro	48.9182	32.6695		15.5369	2.603	0.0039		0.0034	0.1347			99.8696
Pl	735B_91R1_93A	30 / 1 .	518.343	rim	Ol-rich gabbro	48.0193	33.4751		16.3941	2.1408	0.0123		0.015	0.1553			100.212
Pl	735B_91R1_93A	33 / 1 .	518.343	rim	Ol-rich gabbro	49.275	32.6541		15.5085	2.6482	0.0137		0.0159	0.078			100.193
Pl	735B_91R1_93A	46 / 1 .	518.351	rim	Ol-rich gabbro	49.3869	32.0028		15.3704	2.8349	0.0355		0.0337	0.0901			99.7543
Pl	735B_91R1_93A	73 / 1 .	518.334	rim	Ol-rich gabbro	48.754	32.5521		15.5074	2.8535	0.0218		0	0.0985			99.7873
Pl	735B_91R1_93A	75 / 1 .	518.334	rim	Ol-rich gabbro	49.7133	32.0876		14.8612	2.9502	0.0027		0.0044	0.1135			99.7329
Pl	735B_91R1_93A	78 / 1 .	518.334	rim	Ol-rich gabbro	48.5617	32.9001		15.9144	2.4025	0.0245		0.0371	0.1285			99.9688
Pl	735B_91R1_74	7 / 1 .	518.164	rim	Ol-rich gabbro	50.1152	32.2614		14.8933	3.0474	0.0027		0.1171	0.2288			100.666
Pl	735B_91R1_74	8 / 1 .	518.164	rim	Ol-rich gabbro	48.3646	33.0933		16.2533	2.3637	0.0178		0.0283	0.0924			100.213
Pl	735B_91R1_74	9 / 1 .	518.164	rim	Ol-rich gabbro	49.5181	32.131		15.249	3.0691	0.0547		0.0319	0.0794			100.133
Pl	735B_91R1_74	16 / 1 .	518.164	rim	Ol-rich gabbro	49.1507	32.107		15.3113	2.8835	0.0068		0.0097	0.0894			99.5584
Pl	735B_91R1_74	25 / 1 .	518.162	rim	Ol-rich gabbro	49.3444	32.48		15.4034	2.7889	0.0153		0.0261	0.1578			100.216
Pl	735B_91R1_74	35 / 1 .	518.154	rim	Ol-rich gabbro	49.1727	32.5842		15.4509	2.7812	0.0014		0	0.1315			100.122
Pl	735B_91R1_74	37 / 1 .	518.154	rim	Ol-rich gabbro	49.4331	32.235		15.2475	2.7716	0.0068		0.008	0.0758			99.7778
Pl	735B_91R1_74	42 / 1 .	518.152	rim	Ol-rich gabbro	49.2251	32.4069		15.3084	2.7702	0.0096		0.0302	0.1325			99.8829
Pl	735B_91R1_74	52 / 1 .	518.145	rim	Ol-rich gabbro	49.1765	32.4122		15.2487	2.7245	0.0382		0.0051	0.095			99.7002
Pl	735B_91R1_74	59 / 1 .	518.153	rim	Ol-rich gabbro	49.0058	32.4989		15.595	2.8622	0.0196		0.0289	0.1144			100.125
Pl	735B_91R1_74	72 / 1 .	518.15	rim	Ol-rich gabbro	49.32	32.4159		15.349	2.9773	0.0026		0.0213	0.1051			100.191
Pl	735B_91R1_74	73 / 1 .	518.15	rim	Ol-rich gabbro	48.0968	32.8492		16.2324	2.5563	0.0068		0.023	0.0444			99.8089
Pl	735B_87R7_49	2 / 1 .	499.632	core	Troctolite	51.1219	30.9298		14.006	3.7425	0		0	0.1188			99.919
Pl	735B_87R7_49	5 / 1 .	499.632	core	Troctolite	50.3963	31.6308		14.2735	3.4439	0.0216		0.0176	0.0979			99.8816
Pl	735B_87R7_49	20 / 1 .	499.635	core	Troctolite	51.5353	30.8859		13.6395	3.6634	0.0255		0.0202	0.1372			99.907
Pl	735B_87R7_49	24 / 1 .	499.635	core	Troctolite	51.7319	30.7631		13.464	4.1027	0.039		0.0379	0.1458			100.284
Pl	735B_87R7_49	25 / 1 .	499.635	core	Troctolite	52.244	30.5953		13.2115	4.0627	0.0429		0.0193	0.1265			100.302
Pl	735B_87R7_49	33 / 1 .	499.639	core	Troctolite	51.4999	31.2036		13.8519	3.7977	0.0135		0.053	0.1141			100.534
Pl	735B_87R7_49	45 / 1 .	499.644	core	Troctolite	51.9794	30.8133		13.536	4.0856	0		0.031	0.1324			100.578
Pl	735B_87R7_49	52 / 1 .	499.651	core	Troctolite	50.9388	31.1291		14.1169	3.5137	0.0243		0.0221	0.1494			99.8943
Pl	735B_87R7_49	55 / 1 .	499.652	core	Troctolite	51.9118	30.7016		13.1932	3.9619	0.0349		0.0378	0.1225			99.9637
Pl	735B_87R7_49	58 / 1 .	499.652	core	Troctolite	52.1332	30.3847		12.9663	4.1249	0.0121		0.0246	0.1631			99.8089
Pl	735B_87R7_49	65 / 1 .	499.657	core	Troctolite	50.9772	31.0687		14.1485	3.6933	0.0523		0.0493	0.1345			100.124
Pl	735B_87R7_49	67 / 1 .	499.657	core	Troctolite	50.4421	31.2846		14.3706	3.354	0.0094		0.0308	0.1277			99.6192
Pl	735B_80R2_7.5A	8 / 1 .	425.562	core	Troctolite	49.6228	31.515		15.1324	3.0848	0.0078		0.0025	0.082			99.4473
Pl	735B_80R2_7.5A	11 / 1 .	425.562	core	Troctolite	51.6721	30.7937		13.3857	3.947	0.0144		0	0.0876			99.9005
Pl	735B_80R2_7.5A	14 / 1 .	425.562	core	Troctolite	50.9911	31.4715		14.1566	3.5654	0.0445		0.0473	0.0676			100.344
Pl	735B_80R2_7.5A	18 / 1 .	425.561	core	Troctolite	51.302	30.8512		13.6315	3.8306	0.0523		0.0347	0.0862			99.7885
Pl	735B_80R2_7.5A	19 / 1 .	425.561	core	Troctolite	50.7235	31.0808		14.1716	3.4099	0.0262		0.0223	0.1066			99.5409
Pl	735B_80R2_7.5A	27 / 1 .	425.562	core	Troctolite	51.0001	31.1072		14.2324	3.5352	0		0	0.0929			99.9678
Pl	735B_80R2_7.5A	28 / 1 .	425.562	core	Troctolite	51.5175	31.2542		13.9184	3.8588	0.0684		0.0256	0.0771			100.72
Pl	735B_80R2_7.5A	30 / 1 .	425.562	core	Troctolite	51.7547	30.7628		13.3536	3.8833	0.0179		0.0115	0.0745			99.8583
Pl	735B_80R2_7.5A	36 / 1 .	425.56	core	Troctolite	49.3402	32.4326		15.6167	2.9335	0.0341		0.0088	0.1262			100.492
Pl	735B_80R2_7.5A	39 / 1 .	425.56	core	Troctolite	48.6214	32.4278		15.9758	2.6555	0.0095		0.0317	0.0942			99.8159
Pl	735B_80R2_7.5A	40 / 1 .	425.56	core	Troctolite	50.4179	31.2929		14.0903	3.6276	0.0465		0.0283	0.1192			99.6227
Pl	735B_80R2_7.5A	43 / 1 .	425.554	core	Troctolite	50.9317	31.2849		14.0485	3.5941	0.0342		0	0.0679			99.9613
Pl	735B_80R2_7.5A	47 / 1 .	425.554	core	Troctolite	50.6292	31.1562		14.1185	3.5781	0.0055		0.023	0.1274			99.6379
Pl	735B_80R2_7.5A	55 / 1 .	425.557	core	Troctolite	51.4232	30.8723		13.5331	3.8437	0.0192		0.0106	0.0614			99.7635
Pl	735B_80R2_7.5A	56 / 1 .	425.557	core	Troctolite	48.0605	33.3913		16.4781	2.1596	0		0.014	0.1558			100.259
Pl	735B_80R2_7.5A	58 / 1 .	425.557	core	Troctolite	50.9926	31.0631		14.267	3.4271	0.0164		0	0.0985			99.8647
Pl	735B_80R2_7.5A	60 / 1 .	425.557	core	Troctolite	50.5903	31.1521		14.3227	3.5463	0.0123		0.0106	0.0945			99.7288
Pl	735B_80R2_7.5A	64 / 1 .	425.557	core	Troctolite	50.5236	31.3538		14.4657	3.3122	0.0301		0.0026	0.1221			99.8101
Pl	735B_80R2_7.5A	66 / 1 .	425.557	core	Troctolite	51.085	31.2459		13.8283	3.6558	0		0	0.0707			99.8857
Pl	735B_80R2_7.5A	67 / 1 .	425.548	core	Troctolite	49.8744	32.0204		14.9422	3.129	0.0096		0.0539	0.1003			100.13
Pl	735B_80R2_7.5A	70 / 1 .	425.548	core	Troctolite	50.362	31.5203		14.4494	3.3107	0.0616		0.0521	0.1023			99.8584
Pl	735B_80R2_7.5A	82 / 1 .	425.551	core	Troctolite	49.1758	32.1499		15.3528	2.8188	0.0082		0.0327	0.0983			99.6365
Pl	735B_89R1_47	7 / 1 .	505.273	core	Troctolite	51.3655	30.8298		13.8041	3.8336	0.0052		0.0051	0.092			99.9353
Pl	735B_89R1_47	9 / 1 .	505.273	core	Troctolite	51.9828	30.3907		13.0135	4.1634	0.0137		0.0196	0.0236			99.6073
Pl	735B_89R1_47	17 / 1 .	505.275	core	Troctolite	49.1567	32.2524		15.5355	2.7987	0		0.0068	0.0845			99.8346
Pl	735B_89R1_47	20 / 1 .	505.275	core	Troctolite	50.9041	31.4474		14.4567	3.6716	0.0424		0.0062	0.1557			100.684
Pl	735B_89R1_47	21 / 1 .	505.277	core	Troctolite	50.5663	31.181		14.3023	3.4868	0.0233		0	0.1216			99.6813
Pl	735B_89R1_47	27 / 1 .	505.281	core	Troctolite	48.553	32.1348		15.8038	2.7962	0.0424		0.0417	0.1783			99.5502
Pl	735B_89R1_47	29 / 1 .	505.281	core	Troctolite	51.7477	30.5876		13.5987	3.8448	0.0699		0.0543	0.1401			100.043
Pl	735B_89R1_47	32 / 1 .	505.283	core	Troctolite	50.9877	30.8014		13.5692	3.6711	0.0398		0.0223	0.0938			99.1853
Pl	735B_89R1_47	37 / 1 .	505.283	core	Troctolite	50.5298	31.2577		14.2533	3.5524	0.0384		0.048	0.0773			99.7569
Pl	735B_89R1_47	40 / 1 .	505.291	core	Troctolite	50.7086	31.2259		14.2996	3.5751	0.0411		0.0302	0.1052			99.9857
Pl	735B_89R1_47	41 / 1 .	505.291	core	Troctolite	48.7954	32.2765		15.3631	2.8312	0		0.0009	0.1577			99.4248
Pl	735B_89R1_47	50 / 1 .	505.298	core	Troctolite	50.6871	31.2293		14.098	3.5309	0		0.0235	0.1039			99.6727
Pl	735B_89R1_47	52 / 1 .	505.3	core	Troctolite	51.0341	30.9107		13.9194	3.6932	0		0.0358	0.2352			99.8284
Pl	735B_90R2_68	4	510.015	core	Troctolite	50.5832	31.1236		14.5136	3.9445	0.0461		0.019	0.1495			100.429
Pl	735B_90R2_68	10	510.015	core	Troctolite	50.5236	31.0455		14.404	4.1261	0.0419		0.0085	0.1271			100.351
Pl	735B_90R2_68	14	510.015	core	Troctolite	50.3396	31.2172		14.3432	4.1561	0.0478		0.0225	0.12			100.329
Pl	735B_90R2_68	16	510.015	core	Troctolite	49.0071	31.6964		15.6025	3.2897	0.0256		0.0277	0.2036			99.9409
Pl	735B_90R2_68	24	510.015	core	Troctolite	49.3877	31.834		15.4664	3.5341	0.0352		0.0251	0.1376			100.474
Pl	735B_90R2_68	27	510.015	core	Troctolite	50.4684	31.0107		14.4721	3.9805	0.0451		0.0135	0.1098			100.18
Pl	735B_90R2_68	34	510.015	core	Troctolite	49.8091	31.2537		14.9145	3.7355	0.1301		0.1733	0.2482			100.356
Pl	735B_90R2_68	38	510.015	core	Troctolite	49.0938	31.8453		15.5149	3.4625	0.0246		0.0096	0.1882			100.194
Pl	735B_90R2_68	42	510.015	core	Troctolite	49.4552	32.0271		15.6021	3.5159	0.0333		0.0143	0.1537			100.859
Pl	735B_90R2_68	44	510.015	core	Troctolite	50.2825	31.2293		14.8149	3.9648	0.0368		0.0101	0.1366			100.531
Pl	735B_90R2_68	45	510.015	core	Troctolite	51.1792	30.5485		13.8761	4.2519	0.0466		0.0059	0.1039			100.097
Pl	735B_90R2_68	46	510.015	core	Troctolite	50.4481	31.2602		14.7136	4.0657	0.0329		0.0228	0.1603			100.793
Pl	735B_87R7_49	1 / 1 .	499.632	rim	Troctolite	51.4042	31.3988		14.139	3.709	0.0229		0.0071	0.1866			100.868
Pl	735B_87R7_49	3 / 1 .	499.632	rim	Troctolite	49.301	32.3845		15.1236	2.8098	0.0027		0.0114	0.1366			99.7696
Pl	735B_87R7_49	4 / 1 .	499.632	rim	Troctolite	51.6921	31.0562		13.5667	3.9175	0.0243		0	0.1654			100.422
Pl	735B_87R7_49	19 / 1 .	499.635	rim	Troctolite	51.7743	31.022		13.5699	3.8743	0.0375		0	0.0664			100.344
Pl	735B_87R7_49	23 / 1 .	499.635	rim	Troctolite	51.429	31.1089		13.5868	3.9921	0.0201		0	0.1546			100.291
Pl	735B_87R7_49	32 / 1 .	499.639	rim	Troctolite	51.5238	31.035		13.8085	3.8673	0.0432		0.0239	0.2543			100.556
Pl	735B_87R7_49	46 / 1 .	499.644	rim	Troctolite	48.28	33.028		16.1061	2.3736	0.0027		0.0078	0.2535			100.052
Pl	735B_87R7_49	51 / 1 .	499.651	rim	Troctolite	50.7872	31.1139		14.2799	3.5619	0.0566		0.0062	0.1944			100
Pl	735B_87R7_49	56 / 1 .	499.652	rim	Troctolite	49.1643	32.107		15.1435	2.8491	0.016		0.0017	0.1742			99.4558
Pl	735B_87R7_49	57 / 1 .	499.652	rim	Troctolite	51.9504	30.5489		13.5447	4.0599	0.0148		0.0519	0.1589			100.33
Pl	735B_87R7_49	64 / 1 .	499.657	rim	Troctolite	50.4007	31.5836		14.2269	3.5412	0.0241		0.0131	0.093			99.8826
Pl	735B_87R7_49	66 / 1 .	499.657	rim	Troctolite	51.8377	30.4954		13.2711	3.917	0.0189		0	0.099			99.6391
Pl	735B_80R2_7.5A	9 / 1 .	425.562	rim	Troctolite	50.5462	31.4888		14.3356	3.4097	0		0.0093	0.1383			99.9279
Pl	735B_80R2_7.5A	10 / 1 .	425.562	rim	Troctolite	51.1837	30.9497		13.3536	3.6905	0.0165		0	0.0859			99.2799
Pl	735B_80R2_7.5A	12 / 1 .	425.562	rim	Troctolite	48.8414	32.8592		16.1928	2.6038	0.0233		0	0.0984			100.619
Pl	735B_80R2_7.5A	13 / 1 .	425.562	rim	Troctolite	52.417	30.4646		13.0437	4.0086	0.0549		0.0292	0.0743			100.092
Pl	735B_80R2_7.5A	17 / 1 .	425.561	rim	Troctolite	50.1375	31.7972		14.5924	3.2786	0		0.0238	0.1198			99.9493
Pl	735B_80R2_7.5A	26 / 1 .	425.562	rim	Troctolite	51.9805	30.3743		13.1416	4.1506	0.0276		0.0254	0.1347			99.8347
Pl	735B_80R2_7.5A	29 / 1 .	425.562	rim	Troctolite	48.6592	32.7159		15.5511	2.6398	0.0027		0	0.1298			99.6985
Pl	735B_80R2_7.5A	31 / 1 .	425.562	rim	Troctolite	51.3697	31.1328		13.4612	3.6231	0.0406		0.032	0.0655			99.7249
Pl	735B_80R2_7.5A	37 / 1 .	425.56	rim	Troctolite	51.6789	30.6638		13.5752	3.975	0.0237		0.0261	0.1104			100.053
Pl	735B_80R2_7.5A	38 / 1 .	425.56	rim	Troctolite	51.2138	31.1646		14.1532	3.7952	0.0205		0.054	0.1699			100.571
Pl	735B_80R2_7.5A	44 / 1 .	425.554	rim	Troctolite	51.4416	30.911		13.6335	3.7958	0.0232		0.0124	0.0421			99.8596
Pl	735B_80R2_7.5A	45 / 1 .	425.554	rim	Troctolite	51.5021	30.7201		13.3203	3.949	0.0562		0.0415	0.0742			99.6634
Pl	735B_80R2_7.5A	46 / 1 .	425.554	rim	Troctolite	50.4219	31.4426		14.2648	3.2969	0.0369		0	0.1015			99.5646
Pl	735B_80R2_7.5A	54 / 1 .	425.557	rim	Troctolite	51.0767	30.8598		13.9553	3.5839	0.0398		0.0018	0.1289			99.6462
Pl	735B_80R2_7.5A	57 / 1 .	425.557	rim	Troctolite	50.3204	31.573		14.8387	3.1938	0.0096		0.0132	0.1123			100.061
Pl	735B_80R2_7.5A	59 / 1 .	425.557	rim	Troctolite	50.2014	31.8982		14.5531	3.2063	0.0027		0	0.0908			99.9525
Pl	735B_80R2_7.5A	65 / 1 .	425.557	rim	Troctolite	50.321	31.577		14.2577	3.3139	0.0123		0	0.1322			99.6141
Pl	735B_80R2_7.5A	68 / 1 .	425.548	rim	Troctolite	50.3973	31.5812		14.7623	3.1993	0.0137		0.0309	0.1407			100.125
Pl	735B_80R2_7.5A	69 / 1 .	425.548	rim	Troctolite	50.9129	31.3041		14.079	3.4541	0		0.0212	0.1545			99.9258
Pl	735B_80R2_7.5A	71 / 1 .	425.548	rim	Troctolite	51.043	30.9278		13.6464	3.7529	0.0275		0.0053	0.111			99.5139
Pl	735B_80R2_7.5A	81 / 1 .	425.551	rim	Troctolite	50.2931	31.86		14.7922	3.199	0.0273		0.0035	0.0414			100.216
Pl	735B_89R1_47	8 / 1 .	505.273	rim	Troctolite	51.2507	30.8497		13.5357	3.8672	0.0288		0.0365	0.1104			99.679
Pl	735B_89R1_47	18 / 1 .	505.275	rim	Troctolite	49.4082	32.5274		15.298	2.7856	0.0143		0.0194	0.079			100.132
Pl	735B_89R1_47	19 / 1 .	505.275	rim	Troctolite	51.3782	30.9237		13.7562	3.9635	0.0412		0.05	0.1367			100.249
Pl	735B_89R1_47	26 / 1 .	505.281	rim	Troctolite	51.2207	30.5555		13.8279	3.6605	0.0644		0	0.1115			99.4405
Pl	735B_89R1_47	28 / 1 .	505.281	rim	Troctolite	49.7384	31.9632		15.1788	3.1358	0.0056		0	0.0981			100.12
Pl	735B_89R1_47	33 / 1 .	505.283	rim	Troctolite	51.3093	31.0067		13.9419	3.5222	0.0289		0.0027	0.0941			99.9058
Pl	735B_89R1_47	36 / 1 .	505.283	rim	Troctolite	51.0117	31.2369		13.9202	3.7054	0.0287		0.0364	0.1421			100.081
Pl	735B_89R1_47	39 / 1 .	505.291	rim	Troctolite	50.5307	31.2484		13.9924	3.2499	0.0384		0.0764	0.1898			99.326
Pl	735B_89R1_47	49 / 1 .	505.298	rim	Troctolite	51.0759	31.0638		13.8389	3.5037	0.0166		0.0233	0.1655			99.6877
Pl	735B_89R1_47	51 / 1 .	505.298	rim	Troctolite	51.0612	30.7738		13.8545	3.7362	0.0083		0.0134	0.0913			99.5387
Pl	735B_90R2_68	3	510.015	rim	Troctolite	50.217	31.2748		14.6653	3.8525	0.0361		0.0282	0.152			100.309
Pl	735B_90R2_68	5	510.015	rim	Troctolite	51.0777	30.8326		14.1557	4.1853	0.0292		0.0225	0.1277			100.519
Pl	735B_90R2_68	9	510.015	rim	Troctolite	48.3679	32.4518		16.0241	2.9987	0.0281		0.0119	0.1277			100.022
Pl	735B_90R2_68	13	510.015	rim	Troctolite	50.7884	30.918		14.2064	4.0413	0.0461		0.0132	0.1681			100.243
Pl	735B_90R2_68	15	510.015	rim	Troctolite	50.8663	31.0696		14.3985	4.1124	0.0417		0.0039	0.1123			100.656
Pl	735B_90R2_68	23	510.015	rim	Troctolite	50.4162	31.2352		14.4829	4.0316	0.0426		0.0101	0.1754			100.432
Pl	735B_90R2_68	28	510.015	rim	Troctolite	47.3834	33.1414		16.9784	2.5646	0.0133		0.0065	0.0981			100.229
Pl	735B_90R2_68	33	510.015	rim	Troctolite	50.4635	30.9288		14.4857	4.1049	0.036		0.0151	0.1707			100.292
Pl	735B_90R2_68	37	510.015	rim	Troctolite	50.9521	31.0124		14.4876	4.1436	0.0367		0.0093	0.1594			100.854
Pl	735B_90R2_68	41	510.015	rim	Troctolite	49.6254	31.2921		15.0343	3.6614	0.0425		0.0097	0.1474			99.8699
Pl	735B_90R2_68	47	510.015	rim	Troctolite	50.6065	31.1173		14.535	4.0693	0.0319		0.0203	0.1446			100.627
Mineral	Sample	Point	Depth (mbsf)	Grain area	Lithology	SiO2	Al2O3	TiO2	CaO	Na2O	K2O	MnO	MgO	FeO	Cr2O3	NiO	Total
Pl	Counting time (s) - per element					10	10		10	10	10		10	20
Pl	735B_57R3_66	117	278.61	core	Ol-bearing gabbro	52.9741	30.228		12.5159	4.25443	0.047842		0.050911	0.273105			100.344
Pl	735B_57R3_66	130	278.61	core	Ol-bearing gabbro	52.8777	30.0336		12.5556	4.45475	0.041873		0.032449	0.210336			100.206
Pl	735B_58R2_6	143	282.02	core	Ol-bearing gabbro	51.4669	30.6215		12.73	4.08726	0.034134		0.067064	0.34969			99.3565
Pl	735B_58R2_26	165	282.02	core	Ol-bearing gabbro	52.0138	30.8551		12.183	4.24836	0.031109		0.041904	0.376893			99.7502
Pl	735B_58R3_46	179	283.73	core	Ol-bearing gabbro	53.3391	29.3043		11.9459	4.69575	0.047999		0.010783	0.154066			99.4979
Pl	735B_58R3_46	191	283.73	core	Ol-bearing gabbro	52.6338	29.4262		12.4613	4.61733	0.004844		0	0.258292			99.4018
Pl	735B_59R3_43	203	288.43	core	Ol-bearing gabbro	52.4743	30.0825		12.7828	4.04156	0.095342		0.072848	0.281986			99.8313
Pl	735B_59R3_43	216	288.43	core	Ol-bearing gabbro	51.3694	29.7886		13.0111	3.94918	0.03507		0.028494	0.401353			98.5832
Pl	735B_61R3_100	291	299.445	core	Ol-bearing gabbro	52.3127	30.1928		12.755	4.19342	0.056011		0.039981	0.30906			99.859
Pl	735B_61R3_100	303	299.445	core	Ol-bearing gabbro	51.8632	29.8909		12.2981	4.32504	0.035485		0.031	0.228885			98.6726
Pl	735B_67R2_0	468	331.42	core	Ol-bearing gabbro	51.8014	30.1875		13.3683	4.0978	0.054583		0.042588	0.293371			99.8455
Pl	735B_67R2_0	487	331.42	core	Ol-bearing gabbro	51.5143	30.3074		13.2383	4.16355	0.051196		0.074123	0.305145			99.654
Pl	735B_57R3_66	124	278.61	rim	Ol-bearing gabbro	54.4451	29.4192		11.3671	5.10683	0.01412		0	0.264689			100.617
Pl	735B_57R3_66	137	278.61	rim	Ol-bearing gabbro	53.3714	29.7606		12.0446	4.66516	0.048939		0.035012	0.273784			100.199
Pl	735B_58R2_26	159	282.02	rim	Ol-bearing gabbro	52.9598	30.2438		11.6546	4.75207	0.010323		0.011758	0.306363			99.9387
Pl	735B_58R2_26	173	282.02	rim	Ol-bearing gabbro	54.6009	29.771		10.4737	5.4151	0.017903		0.027393	0.274275			100.58
Pl	735B_58R3_46	185	283.73	rim	Ol-bearing gabbro	54.5173	28.778		11.7529	4.83383	0.065231		0.014732	0.250221			100.212
Pl	735B_58R3_46	197	283.73	rim	Ol-bearing gabbro	54.913	28.4913		11.4478	5.10025	0.037215		0.018579	0.296036			100.304
Pl	735B_59R3_43	210	288.43	rim	Ol-bearing gabbro	49.1943	32.4381		15.401	2.7554	0.035586		0.03172	0.243759			100.1
Pl	735B_59R3_43	223	288.43	rim	Ol-bearing gabbro	54.6042	28.3503		11.3606	5.16518	0.076685		0.038055	0.209031			99.8041
Pl	735B_61R3_100	297	299.445	rim	Ol-bearing gabbro	55.5778	28.3164		10.323	5.46235	0.088063		0.033769	0.249755			100.051
Pl	735B_61R3_100	310	299.445	rim	Ol-bearing gabbro	52.4766	29.9076		12.1592	4.57723	0.003179		0.027026	0.162483			99.3133
Pl	735B_67R2_0	481	331.42	rim	Ol-bearing gabbro	51.5305	30.3572		12.9186	4.03792	0.047046		0.040326	0.221008			99.1526
Pl	735B_67R2_0	500	331.42	rim	Ol-bearing gabbro	53.5295	29.4256		11.7679	4.74717	0.0205		0.016989	0.301835			99.8095
Pl	735B_63R1_87	342	306.39	core	Gabbro	51.6182	30.2794		13.1362	4.13671	0.044017		0.030531	0.271687			99.5167
Pl	735B_63R1_87	355	306.39	core	Gabbro	50.9907	30.3733		13.2715	4.06713	0.054451		0.052536	0.262147			99.0718
Pl	735B_63R1_87	369	306.39	core	Gabbro	51.5362	30.1929		13.3982	3.88086	0.039943		0.018713	0.282934			99.3498
Pl	735B_63R1_87	381	306.39	core	Gabbro	51.2668	30.4887		13.2987	4.07162	0.047974		0.022418	0.282407			99.4786
Pl	735B_63R1_87	393	306.39	core	Gabbro	51.8308	30.7629		13.291	3.99221	0.089033		0.053521	0.19981			100.219
Pl	735B_63R1_87	349	306.39	rim	Gabbro	54.0432	29.6956		11.9303	4.94143	0.029961		0.001451	0.223524			100.865
Pl	735B_63R1_87	363	306.39	rim	Gabbro	54.8997	28.9857		10.8523	5.54629	0.033015		0.004652	0.177756			100.499
Pl	735B_63R1_87	375	306.39	rim	Gabbro	54.6325	28.7031		10.6752	5.30921	0.024166		0	0.297764			99.6419
Pl	735B_63R1_87	387	306.39	rim	Gabbro	53.7703	28.2521		10.9315	5.28988	0.040539		0	0.235586			98.5199
Pl	735B_63R1_87	400	306.39	rim	Gabbro	54.8681	28.6902		10.8468	5.42883	0.007811		0.001111	0.233824			100.077
Pl	735B_60R3_27	229	293.19	core	Ol-gabbro	51.3993	29.7766		13.1106	4.06476	0.05774		0.042443	0.258407			98.7099
Pl	735B_60R3_27	242	293.19	core	Ol-gabbro	52.5435	30.1674		12.9799	4.13032	0.034151		0.061933	0.361661			100.279
Pl	735B_60R3_27	254	293.19	core	Ol-gabbro	51.7235	29.9689		12.6387	4.15182	0.053143		0.066746	0.328534			98.9313
Pl	735B_61R3_66	266	299.11	core	Ol-gabbro	52.962	29.7241		11.7735	4.66562	0.060011		0.04947	0.185272			99.42
Pl	735B_61R3_66	278	299.11	core	Ol-gabbro	52.1917	30.2998		12.6738	4.22478	0.059429		0.057691	0.474538			99.9817
Pl	735B_63R1_20	316	305.715	core	Ol-gabbro	52.3262	30.3167		13.1158	3.96001	0.072394		0.060683	0.34318			100.195
Pl	735B_63R1_20	329	305.715	core	Ol-gabbro	51.7481	29.8689		13.3974	3.98902	0.056443		0.070938	0.33858			99.4694
Pl	735B_63R4_32	406	309.95	core	Ol-gabbro	51.419	29.9757		12.7696	4.17887	0.032663		0.009797	0.175113			98.5607
Pl	735B_63R4_32	419	309.95	core	Ol-gabbro	52.2087	29.2136		11.8485	4.58147	0.099086		0.033533	1.06996			99.0548
Pl	735B_63R4_32	431	309.95	core	Ol-gabbro	52.2822	30.0025		12.6236	4.22157	0.047084		0.017043	0.191528			99.3855
Pl	735B_66R1_57	443	325.59	core	Ol-gabbro	51.5824	30.5428		12.7154	4.11528	0.005587		0.039155	0.251058			99.2517
Pl	735B_66R1_57	456	325.59	core	Ol-gabbro	51.7586	30.6037		12.6287	3.96537	0.036904		0.042877	0.295979			99.3321
Pl	735B_69R2_110	506	343.4	core	Ol-gabbro	51.6003	30.104		12.7948	4.21086	0.011355		0.021099	0.190307			98.9327
Pl	735B_69R2_110	517	343.4	core	Ol-gabbro	52.1081	30.4869		12.9533	4.22105	0.032965		0.046863	0.273481			100.123
Pl	735B_69R2_110	530	343.4	core	Ol-gabbro	52.2618	29.8314		12.5718	4.27643	0.057631		0.035293	0.149164			99.1835
Pl	735B_69R2_110	542	343.4	core	Ol-gabbro	51.5132	30.3814		13.324	3.97329	0.046815		0.024744	0.250603			99.5141
Pl	735B_69R2_110	554	343.4	core	Ol-gabbro	51.539	30.1674		12.95	4.14814	0.020718		0.147611	0.358387			99.3313
Pl	735B_71R2_34	572	352.71	core	Ol-gabbro	51.8721	30.1701		13.1716	4.02599	0.066666		0.059525	0.240277			99.6063
Pl	735B_71R2_34	584	352.71	core	Ol-gabbro	52.3447	30.0262		12.7608	4.20697	0.045518		0.061182	0.248361			99.6937
Pl	735B_72R3_87	599	356.885	core	Ol-gabbro	51.2132	30.0006		12.8917	4.09788	0.066823		0.045644	0.25862			98.5745
Pl	735B_72R3_87	610	356.885	core	Ol-gabbro	52.1591	30.4882		12.8331	4.1793	0.050664		0.0241	0.314655			100.049
Pl	735B_72R3_87	621	356.885	core	Ol-gabbro	52.1182	30.3465		12.8319	4.09998	0.048057		0.022933	0.26988			99.7374
Pl	735B_72R7_25	632	364.525	core	Ol-gabbro	51.9537	29.8012		12.805	4.28799	0.042532		0.001869	0.173537			99.0658
Pl	735B_73R7_60	678	374.395	core	Ol-gabbro	50.501	31.0704		13.5241	3.83015	0.05314		0.032117	0.247865			99.2588
Pl	735B_73R7_60	691	374.395	core	Ol-gabbro	51.3811	31.313		13.5649	3.78983	0.031374		0.02274	0.292273			100.395
Pl	735B_74R4_98	703	380.455	core	Ol-gabbro	50.8953	31.1599		12.718	4.03793	0.053214		0.056031	0.237804			99.1582
Pl	735B_74R5_41	719	381.305	core	Ol-gabbro	51.794	30.5896		12.725	4.10312	0.088702		0.045157	0.279664			99.6252
Pl	735B_74R5_41	732	381.305	core	Ol-gabbro	52.4245	30.2167		12.4831	4.45368	0.02445		0.063361	0.241878			99.9077
Pl	735B_75R1_104	785	385.555	core	Ol-gabbro	50.3155	32.1004		13.4732	3.77304	0.02945		0.028748	0.374847			100.095
Pl	735B_75R1_104	799	385.555	core	Ol-gabbro	51.3791	30.483		13.4217	3.73633	0.018068		0.043092	0.366552			99.4478
Pl	735B_75R3_44	813	387.7	core	Ol-gabbro	52.4322	31.1046		13.3527	3.82592	0.012784		0.027328	0.258895			101.014
Pl	735B_75R7_31	827	392.94	core	Ol-gabbro	51.9806	29.8245		12.9561	4.35059	0.016519		0.035898	0.183353			99.3476
Pl	735B_75R7_31	841	392.94	core	Ol-gabbro	52.2244	30.423		13.0188	4.42267	0.00615		0	0.228019			100.323
Pl	735B_75R7_31	853	392.94	core	Ol-gabbro	52.3282	30.8214		12.833	4.41932	0.028966		0.032596	0.157982			100.621
Pl	735B_75R7_31	865	392.94	core	Ol-gabbro	53.8898	29.8893		11.706	5.14184	0.055973		0.028138	0.280281			100.991
Pl	735B_75R7_31	873	392.94	core	Ol-gabbro	52.532	30.8056		12.448	4.46195	0.033963		0.061032	0.205543			100.548
Pl	735B_60R3_27	236	293.19	rim	Ol-gabbro	54.3664	28.7725		10.804	5.29772	0.024399		0.034597	0.193587			99.4932
Pl	735B_60R3_27	248	293.19	rim	Ol-gabbro	53.804	29.619		12.1584	4.66373	0.024903		0.025863	0.199783			100.496
Pl	735B_60R3_27	260	293.19	rim	Ol-gabbro	53.9419	29.0468		11.0759	5.0165	0.082928		0.018894	0.348233			99.5312
Pl	735B_61R3_66	272	299.11	rim	Ol-gabbro	53.8686	28.6905		11.2045	4.88033	0.019475		0.014764	0.227472			98.9056
Pl	735B_61R3_66	285	299.11	rim	Ol-gabbro	53.697	28.714		11.1147	4.97473	0.070781		0.03793	0.184807			98.7939
Pl	735B_63R1_20	323	305.715	rim	Ol-gabbro	55.615	28.351		10.6828	5.30869	0.09455		0.032984	0.36363			100.449
Pl	735B_63R1_20	336	305.715	rim	Ol-gabbro	54.6337	28.791		11.3719	5.18078	0.044823		0.022166	0.298297			100.343
Pl	735B_63R4_32	413	309.95	rim	Ol-gabbro	52.8183	30.1454		12.723	4.25728	0.011963		0.011309	0.118367			100.086
Pl	735B_63R4_32	425	309.95	rim	Ol-gabbro	53.2746	29.1265		11.5286	4.90101	0		0	0.209961			99.0407
Pl	735B_63R4_32	437	309.95	rim	Ol-gabbro	53.9981	29.1264		11.4267	4.77502	0.024008		0	0.162371			99.5126
Pl	735B_66R1_57	450	325.59	rim	Ol-gabbro	52.7379	30.3973		12.7311	4.18451	0.037088		0.023989	0.281801			100.394
Pl	735B_66R1_57	462	325.59	rim	Ol-gabbro	52.6141	30.1276		12.5534	4.2207	0.037683		0.018118	0.197849			99.7695
Pl	735B_69R2_110	511	343.4	rim	Ol-gabbro	51.3863	30.9748		13.5061	3.93591	0.040249		0.019363	0.177667			100.04
Pl	735B_69R2_110	524	343.4	rim	Ol-gabbro	52.3016	29.5088		12.506	4.44621	0.052699		0.040763	0.26878			99.1249
Pl	735B_69R2_110	536	343.4	rim	Ol-gabbro	50.3055	31.2464		14.3078	3.37779	0.014108		0.020069	0.144554			99.4162
Pl	735B_69R2_110	548	343.4	rim	Ol-gabbro	52.891	29.2518		11.7242	4.69537	0.054617		0.020533	0.143343			98.7809
Pl	735B_69R2_110	565	343.4	rim	Ol-gabbro	52.8453	29.4203		11.7547	4.52698	0.067387		0.028988	0.283733			98.9274
Pl	735B_71R2_34	578	352.71	rim	Ol-gabbro	52.6336	30.1749		12.5313	4.48307	0.060274		0.017677	0.206281			100.107
Pl	735B_71R2_34	593	352.71	rim	Ol-gabbro	52.7534	29.6647		12.3607	4.44249	0.047276		0.06206	0.244738			99.5754
Pl	735B_72R3_87	604	356.885	rim	Ol-gabbro	54.0263	29.3902		11.7873	4.76201	0.061512		0.019605	0.219012			100.266
Pl	735B_72R3_87	615	356.885	rim	Ol-gabbro	54.2419	29.2962		11.4816	5.01835	0.073166		0.026084	0.228065			100.365
Pl	735B_72R3_87	626	356.885	rim	Ol-gabbro	53.4968	29.5422		11.6211	4.88301	0.077442		0.032145	0.184836			99.8375
Pl	735B_72R7_25	644	364.525	rim	Ol-gabbro	52.3053	29.8917		12.0544	4.51458	0.086086		0.045368	0.253955			99.1514
Pl	735B_73R7_60	683	374.395	rim	Ol-gabbro	51.5178	31.3872		13.4846	4.08075	0.036907		0.030358	0.237474			100.775
Pl	735B_73R7_60	697	374.395	rim	Ol-gabbro	52.2421	31.3138		12.8165	4.26958	0.047791		0.138503	0.278235			101.107
Pl	735B_74R4_98	713	380.455	rim	Ol-gabbro	49.6503	33.0285		14.7919	2.86976	0.049039		0.028364	0.229672			100.648
Pl	735B_74R5_41	726	381.305	rim	Ol-gabbro	52.4855	29.8898		12.3031	4.52538	0.043607		0.011192	0.172756			99.4313
Pl	735B_74R5_41	737	381.305	rim	Ol-gabbro	52.3425	30.2504		12.3688	4.41441	0.051		0.03006	0.255107			99.7123
Pl	735B_75R1_104	793	385.555	rim	Ol-gabbro	50.8334	30.9994		12.5376	4.29176	0.080943		0.03506	0.288271			99.0664
Pl	735B_75R1_104	807	385.555	rim	Ol-gabbro	52.8865	29.1044		12.1494	4.50608	0.053031		0.01497	0.315759			99.0301
Pl	735B_75R3_44	821	387.7	rim	Ol-gabbro	49.825	31.7619		14.5491	3.19419	0.028705		0	0.166855			99.5258
Pl	735B_75R7_31	835	392.94	rim	Ol-gabbro	47.878	32.5575		16.0809	2.65936	0.031142		0	0.179268			99.3862
Pl	735B_75R7_31	847	392.94	rim	Ol-gabbro	52.4613	30.3107		12.6022	4.56387	0.01147		0.02285	0.106571			100.079
Pl	735B_75R7_31	859	392.94	rim	Ol-gabbro	52.9931	30.3256		12.6607	4.54559	0.044164		0.018213	0.232029			100.819
Pl	735B_75R7_31	867	392.94	rim	Ol-gabbro	53.0907	30.2197		12.0749	4.67325	0.021485		0.00748	0.2638			100.351
Pl	735B_75R7_31	878	392.94	rim	Ol-gabbro	52.7077	30.2467		12.3489	4.49426	0		0.036114	0.310876			100.145
Pl	735B_86R6_33	1830	488.7	core	Ol-bearing gabbro	51.0799	30.9254		13.5075	4.03088	0.041904		0.038264	0.180237			99.8041
Pl	735B_86R6_33	1843	488.7	core	Ol-bearing gabbro	49.4982	31.753		14.811	3.23448	0.029163		0.011865	0.086405			99.4241
Pl	735B_86R6_33	1854	488.7	core	Ol-bearing gabbro	51.5383	29.9573		12.137	4.44992	0.093422		0.11327	0.215269			98.5045
Pl	735B_86R6_33	1837	488.7	rim	Ol-bearing gabbro	49.4921	31.7257		14.365	3.45134	0.007129		0.024832	0.17725			99.2434
Pl	735B_86R6_33	1847	488.7	rim	Ol-bearing gabbro	51.1264	31.0977		13.4485	4.10999	0.054836		0.026399	0.070396			99.9342
Pl	735B_86R6_33	1859	488.7	rim	Ol-bearing gabbro	51.509	31.3985		13.4787	3.85752	0.043481		0.028865	0.119627			100.436
Pl	735B_76R2_8	884	395.43	core	Ol-gabbro	51.6023	29.9409		12.7868	4.1908	0.081126		0.023525	0.125443			98.7509
Pl	735B_76R2_8	895	395.43	core	Ol-gabbro	52.3354	30.8504		12.7125	4.1788	0.022197		0.018371	0.195262			100.313
Pl	735B_76R5_49	950	399.93	core	Ol-gabbro	52.0781	30.3665		12.8398	4.05964	0.017534		0.017262	0.199753			99.5786
Pl	735B_76R5_49	963	399.93	core	Ol-gabbro	52.8197	30.0623		12.2764	4.37636	0.033126		0.020488	0.205843			99.7942
Pl	735B_76R5_104	976	400.48	core	Ol-gabbro	51.793	30.2872		13.0294	4.03071	0.061322		0.025541	0.255772			99.4829
Pl	735B_76R5_104	989	400.48	core	Ol-gabbro	51.8672	30.3993		12.9077	4.084	0.068391		0.007912	0.252282			99.5868
Pl	735B_78R4_29	1056	414.08	core	Ol-gabbro	50.9907	30.481		13.6131	3.91859	0.032705		0.005519	0.117216			99.1588
Pl	735B_78R4_29	1067	414.08	core	Ol-gabbro	50.865	30.6062		13.351	3.95583	0.011557		0.006174	0.120476			98.9162
Pl	735B_78R4_29	1080	414.08	core	Ol-gabbro	50.7798	30.8494		13.705	3.63336	0.006777		0.010003	0.059647			99.044
Pl	735B_79R7_104	1093	424.34	core	Ol-gabbro	50.8772	31.1819		13.9214	4.06335	0.037136		0.014647	0.126164			100.222
Pl	735B_79R7_104	1102	424.34	core	Ol-gabbro	50.7936	31.2169		13.6159	3.88132	0.040344		0.038795	0.138917			99.7258
Pl	735B_79R7_104	1110	424.34	core	Ol-gabbro	51.0322	31.207		13.6837	3.99633	0.037893		0.033161	0.115216			100.106
Pl	735B_79R7_104	1119	424.34	core	Ol-gabbro	50.6311	31.3672		13.8954	3.82249	0.034644		0.005912	0.114863			99.8716
Pl	735B_79R7_104	1127	424.34	core	Ol-gabbro	49.1784	31.9655		14.6816	3.40873	0.03787		0.004186	0.073004			99.3493
Pl	735B_79R7_104	1137	424.34	core	Ol-gabbro	49.8415	31.3071		14.2925	3.68884	0.021399		0.025674	0.0318			99.2088
Pl	735B_79R7_104	1148	424.34	core	Ol-gabbro	49.6511	31.4768		14.0619	3.67636	0.024638		0.011138	0.09528			98.9972
Pl	735B_79R7_104	1158	424.34	core	Ol-gabbro	53.8394	28.8484		11.2551	5.37671	0.067818		0.032546	0.137221			99.5572
Pl	735B_79R7_104	1169	424.34	core	Ol-gabbro	52.6517	29.785		11.6772	5.15191	0.068806		0.030512	0.175212			99.5403
Pl	735B_80R2_89	1180	426.39	core	Ol-gabbro	49.9456	31.66		13.6967	3.86396	0.044371		0.028133	0.211274			99.45
Pl	735B_80R2_89	1194	426.39	core	Ol-gabbro	50.822	31.8112		13.6925	3.94331	0.030803		0.026806	0.170504			100.497
Pl	735B_80R2_89	1207	426.39	core	Ol-gabbro	50.5422	31.9802		13.8099	3.88609	0.063645		0.026814	0.070498			100.379
Pl	735B_80R4_98	1220	429.39	core	Ol-gabbro	49.93	31.0183		13.9332	3.54001	0.050619		0.011523	0.150381			98.634
Pl	735B_80R4_98	1232	429.39	core	Ol-gabbro	48.9885	31.8269		15.1961	2.96031	0.00802		0.031218	0.128513			99.1396
Pl	735B_80R4_98	1243	429.39	core	Ol-gabbro	49.5769	31.7233		13.8105	3.5667	0.138206		0.201999	0.239636			99.2572
Pl	735B_81R5_2	1391	439.21	core	Ol-gabbro	51.769	30.3395		12.9257	4.18239	0.045572		0.004246	0.073381			99.3398
Pl	735B_83R3_112	1505	456.65	core	Ol-gabbro	49.1469	32.8125		15.2128	2.89439	0.006346		0.028738	0.320469			100.422
Pl	735B_83R3_112	1513	456.65	core	Ol-gabbro	52.7601	30.1923		12.1156	4.56975	0.076243		0.036385	0.126759			99.8771
Pl	735B_83R3_112	1530	456.65	core	Ol-gabbro	52.6877	30.6408		12.2188	4.61575	0.050683		0.027021	0.18611			100.427
Pl	735B_83R3_112	1545	456.65	core	Ol-gabbro	52.8705	30.4108		11.8878	4.73324	0.068704		0.034639	0.186923			100.193
Pl	735B_83R3_112	1557	456.65	core	Ol-gabbro	52.3999	30.8535		12.2905	4.58818	0.052716		0.044066	0.219684			100.449
Pl	735B_84R1_120	1669	463.215	core	Ol-gabbro	53.9382	29.941		10.717	5.17241	0.056385		0.007573	0.124077			99.9566
Pl	735B_84R1_120	1680	463.215	core	Ol-gabbro	51.9108	31.1648		12.4415	4.67906	0.064962		0.008863	0.221838			100.492
Pl	735B_84R6_56	1695	469.29	core	Ol-gabbro	53.6132	30.6209		11.7856	4.59819	0.044982		0.019872	0.192396			100.875
Pl	735B_84R6_56	1709	469.29	core	Ol-gabbro	52.6754	29.5513		11.9259	4.51681	0.050453		0.026219	0.105097			98.8512
Pl	735B_85R7_22	1765	480.135	core	Ol-gabbro	49.2419	32.1284		14.7674	3.22921	0.025698		0.021449	0.143772			99.5578
Pl	735B_85R7_22	1775	480.135	core	Ol-gabbro	49.7762	32.2041		14.7716	3.11561	0.018616		0.02687	0.126816			100.04
Pl	735B_85R7_22	1785	480.135	core	Ol-gabbro	48.2395	33.0649		15.7588	2.73759	0.028083		0.066765	0.094116			99.9897
Pl	735B_85R7_22	1795	480.135	core	Ol-gabbro	50.4685	31.3313		13.7321	3.6405	0.047462		0.056982	0.069293			99.3462
Pl	735B_86R3_97	1807	484.99	core	Ol-gabbro	52.8785	30.269		12.4368	4.4451	0.057732		0.009824	0.102156			100.199
Pl	735B_86R3_97	1820	484.99	core	Ol-gabbro	52.4796	30.3226		12.3556	4.46281	0.073939		0.035044	0.189594			99.9192
Pl	735B_87R1_11	1865	490.62	core	Ol-gabbro	54.6893	28.6885		10.3794	5.50707	0.079344		0.028452	0.106792			99.4788
Pl	735B_87R1_11	1877	490.62	core	Ol-gabbro	54.7301	28.5991		10.8784	5.30278	0.063149		0.03404	0.158441			99.766
Pl	735B_87R1_11	1888	490.62	core	Ol-gabbro	55.7611	28.3187		10.6286	5.58183	0.085274		0.010561	0.144574			100.531
Pl	735B_88N1_33	2021	500.35	core	Ol-gabbro	50.0717	31.7356		14.1211	3.39228	0.013141		0.026684	0.158532			99.5191
Pl	735B_88N1_33	2033	500.35	core	Ol-gabbro	50.3891	31.7228		14.1278	3.3301	0.033482		0.03909	0.1623			99.8046
Pl	735B_88N1_33	2044	500.35	core	Ol-gabbro	50.1178	30.8392		13.5588	3.7658	0.010557		0.056832	0.225393			98.5743
Pl	735B_90R1_97	2087	508.795	core	Ol-gabbro	50.5293	31.3046		14.412	3.66584	0.022926		0.035429	0.278969			100.249
Pl	735B_90R1_97	2103	508.795	core	Ol-gabbro	47.7255	33.3386		16.0115	2.61144	0		0.044291	0.24115			99.9725
Pl	735B_90R1_97	2116	508.795	core	Ol-gabbro	50.0191	31.2632		14.1675	3.55613	0.020903		0.029939	0.25766			99.3144
Pl	735B_90R1_97	2140	508.795	core	Ol-gabbro	50.6483	30.9115		14.0226	3.88512	0.019527		0.055672	0.168558			99.7113
Pl	735B_90R6_126	2150	515.785	core	Ol-gabbro	48.7295	32.395		15.2763	2.81483	0.006948		0.052199	0.265805			99.5406
Pl	735B_90R6_126	2164	515.785	core	Ol-gabbro	50.7767	31.4354		14.1025	3.56829	0.037047		0.017819	0.24926			100.187
Pl	735B_90R6_126	2176	515.785	core	Ol-gabbro	48.7311	32.5446		15.5482	2.69145	0.049259		0.036282	0.281637			99.8825
Pl	735B_90R6_126	2188	515.785	core	Ol-gabbro	48.4231	32.8433		15.6842	2.853	0.032421		0.056233	0.162618			100.055
Pl	735B_91R3_133	2223	521.293	core	Ol-gabbro	48.6392	31.125		14.5742	2.83211	0.375111		0.657214	0.738109			98.941
Pl	735B_91R3_133	2236	521.293	core	Ol-gabbro	50.5838	31.9209		13.7644	3.70265	0.055542		0.023719	0.199555			100.251
Pl	735B_92R2_97.5	2249	529.368	core	Ol-gabbro	53.4654	29.0448		11.696	4.92184	0.055946		0.024805	0.496949			99.7058
Pl	735B_92R2_97.5	2260	529.368	core	Ol-gabbro	53.8848	29.0325		11.3274	5.11602	0.040279		0.013837	0.326691			99.7415
Pl	735B_76R2_8	889	395.43	rim	Ol-gabbro	49.0641	31.8958		14.9346	2.98135	0.03017		0.031528	0.154597			99.0921
Pl	735B_76R5_49	957	399.93	rim	Ol-gabbro	50.6726	31.4791		14.0501	3.60524	0.034191		0.037693	0.164306			100.043
Pl	735B_76R5_49	970	399.93	rim	Ol-gabbro	52.8762	29.7892		12.3476	4.4551	0.025175		0.03089	0.260659			99.7848
Pl	735B_76R5_104	983	400.48	rim	Ol-gabbro	50.5617	31.7397		14.4708	3.27018	0.045204		0.022086	0.194372			100.304
Pl	735B_76R5_104	995	400.48	rim	Ol-gabbro	54.304	29.2086		11.2967	4.87969	0.052628		0.017466	0.221853			99.9809
Pl	735B_78R4_29	1061	414.08	rim	Ol-gabbro	52.4587	29.8466		12.4343	4.38659	0.058105		0.04822	0.131173			99.3637
Pl	735B_78R4_29	1074	414.08	rim	Ol-gabbro	52.0437	30.235		12.8777	4.33003	0.053821		0.040943	0.247477			99.8287
Pl	735B_78R4_29	1087	414.08	rim	Ol-gabbro	51.8234	30.7242		13.3874	4.13935	0.012834		0.004115	0.10232			100.194
Pl	735B_79R7_104	1096	424.34	rim	Ol-gabbro	50.842	31.0897		13.8514	4.05886	0.013438		0.010464	0.085332			99.9512
Pl	735B_79R7_104	1104	424.34	rim	Ol-gabbro	50.8043	30.1377		12.8513	3.92876	0.185406		1.06237	0.64822			99.6181
Pl	735B_79R7_104	1113	424.34	rim	Ol-gabbro	51.2064	30.9993		13.216	4.40601	0.050233		0.022661	0.111835			100.012
Pl	735B_79R7_104	1121	424.34	rim	Ol-gabbro	51.8196	30.8276		13.0604	4.36544	0.013474		0.014413	0.312827			100.414
Pl	735B_79R7_104	1131	424.34	rim	Ol-gabbro	50.2854	31.1472		13.6326	3.94248	0.01979		0.021991	0.133507			99.183
Pl	735B_79R7_104	1141	424.34	rim	Ol-gabbro	50.7126	30.8577		13.6785	4.05519	0.024479		0.007707	0.0715			99.4077
Pl	735B_79R7_104	1152	424.34	rim	Ol-gabbro	50.7935	30.9959		13.3916	4.1908	0.057604		0.02391	0.260061			99.7134
Pl	735B_79R7_104	1163	424.34	rim	Ol-gabbro	53.9853	29.3871		11.5105	5.30199	0.029943		0.012191	0.311442			100.538
Pl	735B_79R7_104	1174	424.34	rim	Ol-gabbro	52.2064	31.0672		12.8666	4.41691	0.03932		0.016193	0.155932			100.769
Pl	735B_80R2_89	1187	426.39	rim	Ol-gabbro	50.9926	30.5377		12.8513	4.33656	0.069423		0.014746	0.132663			98.935
Pl	735B_80R2_89	1201	426.39	rim	Ol-gabbro	52.0328	31.3452		12.8303	4.28494	0.049339		0.052051	0.170288			100.765
Pl	735B_80R2_89	1214	426.39	rim	Ol-gabbro	52.2676	30.1525		11.9519	4.59925	0.040887		0.024423	0.154829			99.1914
Pl	735B_80R4_98	1226	429.39	rim	Ol-gabbro	50.8072	31.5702		14.1307	3.39208	0.013653		0.015805	0.103026			100.033
Pl	735B_80R4_98	1237	429.39	rim	Ol-gabbro	49.6223	32.0072		14.7237	3.16281	0.009274		0.00768	0.108733			99.6417
Pl	735B_80R4_98	1250	429.39	rim	Ol-gabbro	50.0133	31.1189		13.7139	3.67953	0.035339		0.026479	0.108619			98.6961
Pl	735B_81R5_2	1397	439.21	rim	Ol-gabbro	51.3226	30.9145		13.3835	4.07466	0.044255		0.032319	0.122503			99.8943
Pl	735B_83R3_112	1524	456.65	rim	Ol-gabbro	53.8574	30.2336		11.6912	4.87882	0.031718		0.014762	0.145678			100.853
Pl	735B_83R3_112	1538	456.65	rim	Ol-gabbro	55.321	29.1121		10.1877	5.62696	0.08894		0.036118	0.25091			100.624
Pl	735B_83R3_112	1551	456.65	rim	Ol-gabbro	53.4949	30.3309		11.76	4.87403	0.040565		0.005511	0.12499			100.631
Pl	735B_83R3_112	1568	456.65	rim	Ol-gabbro	53.744	30.1195		11.4675	4.83686	0.056632		0.055799	0.191039			100.471
Pl	735B_84R1_120	1673	463.215	rim	Ol-gabbro	52.7076	30.0024		11.033	5.10328	0.052429		0.007525	0.111592			99.0178
Pl	735B_84R1_120	1689	463.215	rim	Ol-gabbro	52.3941	30.4792		11.8043	5.14122	0.018201		0.025866	0.209881			100.073
Pl	735B_84R6_56	1703	469.29	rim	Ol-gabbro	54.0381	29.5023		11.339	5.13111	0.060145		0.010359	0.140827			100.222
Pl	735B_84R6_56	1713	469.29	rim	Ol-gabbro	53.5932	30.2549		12.2558	4.58552	0.055358		0.010377	0.135332			100.89
Pl	735B_85R7_22	1768	480.135	rim	Ol-gabbro	49.2066	33.2197		15.35	2.85383	0.011388		0.009265	0.193622			100.844
[truncated: 826 more rows]
